# Supplementary material for: Identification of C4BPA as a genetically informed drug target in NSCLC: An integrative single-cell and multi-omics study based on the druggable genes
Source: Research Square preprint supplement (doi:10.21203/rs.3.rs-6833129/v1), 2025-06-14
Supplement: Supplementary file 1 [file 6eec8016eb04131a08b043cb.xlsx]

## Sheet: Supplementary Table 1
Supplementary Table 1: DEGs in DC were identified by single-cell analysis.
Gene	p_val	avg_log2FC	p_val_adj
SRSF12	9.99409e-09	-1.2268	0.000279075
IKBKG	9.9899e-29	-1.1061	2.78958e-24
FAM84A	9.98876e-39	3.73671	2.78926e-34
RNF207	9.98787e-227	4.18649	2.78901e-222
RP11-617F23.1	9.97865e-07	-1.66134	0.0278644
FLT1	9.97859e-15	2.32469	2.78642e-10
SH3PXD2B	9.97792e-80	5.32102	2.78623e-75
DPH3	9.97513e-46	-1.00662	2.78546e-41
CLIP1-AS1	9.9744e-10	2.04285	2.78525e-05
RP11-252E2.1	9.9744e-10	2.50526	2.78525e-05
UNC5CL	9.97154e-51	1.62043	2.78445e-46
SYT8	9.97035e-57	1.76679	2.78412e-52
TBL3	9.96608e-230	1.11108	2.78293e-225
ZDHHC6	9.96252e-49	-1.05656	2.78193e-44
BRSK1	9.96117e-08	-1.0221	0.00278156
SIPA1L2	9.9599e-226	5.21615	2.7812e-221
APLN	9.95987e-17	2.77941	2.78119e-12
LINC00264	9.93198e-14	-5.21165	2.77341e-09
LONRF1	9.92989e-125	1.37807	2.77282e-120
PRICKLE2	9.92943e-93	1.68152	2.77269e-88
TRIM16	9.92498e-207	1.83163	2.77145e-202
ZBTB40	9.92436e-36	-1.07469	2.77128e-31
DUSP15	9.92246e-69	5.17829	2.77075e-64
XKR9	9.91295e-17	4.19701	2.76809e-12
RP3-467K16.4	9.91292e-29	-3.44247	2.76808e-24
PAICS	9.90376e-260	1.25141	2.76553e-255
LINC01021	9.90356e-105	7.77608	2.76547e-100
KIAA1324L	9.90031e-130	2.13317	2.76456e-125
ZNF649	9.89638e-17	-1.10916	2.76347e-12
ZNF662	9.88773e-28	2.09535	2.76105e-23
ADAMTS13	9.88568e-32	1.47599	2.76048e-27
SLC4A3	9.88567e-20	4.02125	2.76048e-15
SLC19A2	9.88102e-205	2.38624	2.75918e-200
CTC-260E6.6	9.87683e-50	1.35171	2.75801e-45
KIAA1551	9.87636e-70	-1.72964	2.75788e-65
FAM71E1	9.86653e-56	4.19733	2.75513e-51
MFSD7	9.85951e-160	2.89674	2.75317e-155
PRSS27	9.85723e-35	1.55523	2.75253e-30
TRIM16L	9.85621e-99	2.23771	2.75225e-94
RP11-10C24.1	9.85297e-11	1.24761	2.75134e-06
CEP70	9.84942e-303	1.9	2.75035e-298
LGALSL	9.8331e-224	4.77503	2.74579e-219
NUP210L	9.82411e-11	1.64133	2.74329e-06
ZBTB26	9.82e-08	-1.13554	0.00274214
JARID2	9.81969e-13	-1.53619	2.74205e-08
PHTF1	9.81863e-45	-1.00582	2.74175e-40
ATP10A	9.8186e-18	-1.35344	2.74175e-13
RP11-458F8.4	9.80547e-71	1.79874	2.73808e-66
ITGB1	9.80502e-55	-1.14214	2.73795e-50
NCKAP1L	9.80058e-147	-2.9399	2.73671e-142
DYNLT1	9.79913e-204	1.04732	2.73631e-199
SLC26A9	9.79632e-223	4.97565	2.73553e-218
MAOB	9.79457e-20	1.73262	2.73504e-15
ROR1	9.78924e-74	3.75133	2.73355e-69
IDNK	9.78742e-35	-1.13005	2.73304e-30
ANKRD29	9.78193e-107	3.51391	2.7315e-102
LRCH2	9.7811e-23	5.39086	2.73127e-18
RP11-211G23.2	9.7811e-23	5.44738	2.73127e-18
BLACAT1	9.7811e-23	5.52291	2.73127e-18
RP11-96H19.1	9.78094e-31	1.15479	2.73123e-26
HOTAIR	9.76933e-35	5.93292	2.72799e-30
GRHL1	9.76902e-148	2.96358	2.7279e-143
ZDHHC17	9.76667e-33	-1.12984	2.72724e-28
LGSN	9.76137e-217	8.48006	2.72576e-212
MST1R	9.76039e-203	4.80523	2.72549e-198
SRPK3	9.73692e-49	6.61554	2.71894e-44
ERP27	9.73401e-143	1.36214	2.71812e-138
PCED1B	9.73062e-17	-1.28911	2.71718e-12
ALPK3	9.72685e-68	2.65155	2.71613e-63
DGKK	9.72249e-34	-4.46742	2.71491e-29
SLC38A1	9.72116e-21	-1.86965	2.71454e-16
CD1D	9.71479e-14	2.08219	2.71276e-09
VPS13A	9.70433e-37	-1.02838	2.70984e-32
SSH1	9.70175e-26	-1.3154	2.70912e-21
CASP8AP2	9.6959e-17	-1.44719	2.70748e-12
ZBP1	9.69241e-85	-3.31329	2.70651e-80
EID2	9.68659e-15	-1.55513	2.70488e-10
MYLK4	9.68648e-09	1.84388	0.000270485
CTD-2516F10.2	9.68648e-09	1.94904	0.000270485
RP11-38M8.1	9.6832e-07	-1.22295	0.0270394
GPR157	9.6757e-147	2.92304	2.70184e-142
TRPV4	9.6618e-66	4.14202	2.69796e-61
CTD-3065J16.9	9.65826e-40	2.52945	2.69697e-35
AMIGO2	9.6482e-240	1.42235	2.69416e-235
FCER1G	9.64697e-76	-2.81535	2.69382e-71
TRPV1	9.64598e-38	1.23493	2.69354e-33
AMY1A	9.64503e-11	3.66531	2.69328e-06
RP4-555D20.2	9.64503e-11	4.59578	2.69328e-06
LINC01545	9.64503e-11	3.47216	2.69328e-06
RP11-470P21.2	9.64503e-11	3.69398	2.69328e-06
ADRA2A	9.64503e-11	4.40188	2.69328e-06
LINC01152	9.64503e-11	3.78158	2.69328e-06
RP11-547D23.1	9.64448e-07	-3.68281	0.0269312
CPA6	9.62884e-27	5.62566	2.68876e-22
GMPS	9.62656e-33	-1.26298	2.68812e-28
LINC01315	9.62598e-109	5.35953	2.68796e-104
MBD1	9.6253e-42	-1.13368	2.68777e-37
P3H2	9.62476e-249	4.28566	2.68762e-244
TIAM2	9.62404e-09	-1.20133	0.000268742
SCX	9.62005e-78	2.03177	2.6863e-73
WRN	9.61843e-21	-1.13637	2.68585e-16
FIP1L1	9.60867e-36	-1.06189	2.68313e-31
APITD1	9.60767e-168	2.16896	2.68285e-163
WDR24	9.60708e-142	1.15509	2.68268e-137
ZNF503-AS2	9.60579e-48	4.33696	2.68232e-43
ANKRD12	9.60043e-109	-1.32453	2.68082e-104
HEG1	9.59667e-37	-2.72512	2.67977e-32
PANX2	9.59545e-131	7.47277	2.67943e-126
ZSCAN18	9.59192e-262	1.87522	2.67845e-257
RP11-338N10.2	9.5871e-07	1.4895	0.026771
SCGB1A1	9.58376e-48	-2.19693	2.67617e-43
RP11-789C2.1	9.58342e-07	2.34678	0.0267607
SHANK2-AS1	9.57973e-07	2.63337	0.0267504
RBPMS-AS1	9.57587e-65	3.77604	2.67396e-60
KCNJ11	9.56887e-35	3.96068	2.67201e-30
CA12	9.56745e-108	4.79329	2.67162e-103
CEPT1	9.5615e-30	-1.32012	2.66995e-25
GPR141	9.56132e-70	-3.97406	2.6699e-65
VPS37C	9.55981e-184	1.88587	2.66948e-179
ZNF112	9.55425e-23	1.99093	2.66793e-18
B3GNT6	9.54806e-176	9.45212	2.6662e-171
BST1	9.54308e-35	1.20147	2.66481e-30
RP11-135L13.4	9.54081e-14	1.02054	2.66418e-09
FBXO2	9.53745e-198	1.18438	2.66324e-193
NETO2	9.53414e-158	3.95931	2.66231e-153
SULT1A3	9.53204e-14	-1.11857	2.66173e-09
RP11-334C17.5	9.52898e-165	1.4738	2.66087e-160
ACOT4	9.52357e-19	-1.2828	2.65936e-14
RP11-147L13.15	9.5191e-37	-2.95318	2.65811e-32
PRMT8	9.51822e-19	2.49675	2.65787e-14
RP5-906C1.1	9.51759e-24	-3.2906	2.65769e-19
SETDB2	9.51266e-22	-1.37039	2.65631e-17
RP11-214O1.3	9.50985e-10	-2.72526	2.65553e-05
ELF1	9.50695e-40	-1.65786	2.65472e-35
CXXC1	9.50683e-29	-1.19389	2.65469e-24
STON2	9.5059e-71	5.11833	2.65443e-66
DOCK11	9.50295e-37	-2.68696	2.6536e-32
VAT1	9.49657e-245	1.48782	2.65182e-240
SH2D1A	9.49078e-204	-3.19853	2.65021e-199
UQCRQ	9.48595e-301	1.21103	2.64886e-296
PIK3AP1	9.48182e-45	-2.94949	2.6477e-40
SOGA1	9.47654e-137	2.85725	2.64623e-132
ZYX	9.47508e-07	-1.45502	0.0264582
UBA2	9.47348e-33	-1.02352	2.64538e-28
LRRC24	9.46875e-78	2.1523	2.64405e-73
PCDHGA2	9.46798e-77	6.50755	2.64384e-72
SLC15A3	9.45892e-144	1.75419	2.64131e-139
CENPH	9.45601e-07	-1.78265	0.026405
PPM1K	9.45268e-20	-1.09171	2.63957e-15
TLCD1	9.45149e-264	4.83668	2.63924e-259
GLIS3	9.44362e-254	3.86333	2.63704e-249
RP11-763B22.4	9.43903e-10	-3.15607	2.63576e-05
LAMC2	9.43292e-198	4.51349	2.63405e-193
SEMA3C	9.43023e-255	4.17601	2.6333e-250
NDRG4	9.42632e-07	3.05273	0.026322
LTBP1	9.41461e-31	5.51798	2.62894e-26
RP11-178L8.7	9.40979e-10	1.04126	2.62759e-05
ASAH2	9.39982e-14	1.82541	2.62481e-09
RND3	9.397e-229	3.27034	2.62402e-224
DMRTA1	9.39232e-170	5.00355	2.62271e-165
RP11-81A22.5	9.38866e-17	2.33773	2.62169e-12
AIF1L	9.38796e-46	5.76703	2.62149e-41
PTPRO	9.38714e-10	1.16253	2.62126e-05
DHRS2	9.38594e-18	4.81869	2.62093e-13
FGD5-AS1	9.38185e-30	-1.02998	2.61979e-25
EHD3	9.37352e-10	-1.12704	2.61746e-05
LINC00205	9.36733e-44	5.14538	2.61573e-39
EIF4E3	9.36266e-08	-1.65389	0.00261443
LILRB2	9.36197e-07	-1.30567	0.0261424
PLCL2	9.36024e-72	-2.95019	2.61375e-67
ANO1	9.35811e-31	5.82297	2.61316e-26
USF2	9.35688e-28	-1.04391	2.61281e-23
NEMP2	9.35361e-13	-1.3744	2.6119e-08
SLC22A23	9.34928e-170	3.55334	2.61069e-165
KIN	9.34694e-36	-1.01249	2.61004e-31
SNHG19	9.34415e-277	3.563	2.60926e-272
PCAT7	9.34257e-58	6.53604	2.60882e-53
LAX1	9.3354e-172	-3.52502	2.60682e-167
LINC01569	9.33362e-115	2.01934	2.60632e-110
GLDN	9.33295e-209	4.97714	2.60613e-204
IL33	9.33037e-64	3.77594	2.60541e-59
RP11-488C13.5	9.32696e-79	1.4794	2.60446e-74
ATP11A-AS1	9.32674e-31	3.14657	2.6044e-26
LENG1	9.32662e-09	-1.64338	0.000260436
GOLGA6L9	9.31693e-94	1.93194	2.60166e-89
RP11-177J6.1	9.30815e-08	2.95753	0.00259921
PCDHA6	9.30815e-08	2.93742	0.00259921
PCDHB8	9.30815e-08	3.46115	0.00259921
AC007009.1	9.30815e-08	3.50556	0.00259921
RP11-3B12.5	9.30815e-08	2.7659	0.00259921
CA1	9.30815e-08	3.51042	0.00259921
NPFFR1	9.30815e-08	3.41808	0.00259921
DLEU7-AS1	9.30815e-08	3.56295	0.00259921
RP11-522B15.3	9.30815e-08	3.17893	0.00259921
CDRT1	9.30815e-08	3.64484	0.00259921
SYNGR4	9.30815e-08	3.44188	0.00259921
SIGIRR	9.30793e-20	-1.42669	2.59915e-15
CACNG4	9.30667e-25	5.3671	2.5988e-20
MCM7	9.3053e-53	-1.14585	2.59841e-48
PARP15	9.30365e-136	-3.32429	2.59795e-131
ETV7	9.30178e-110	1.96258	2.59743e-105
RP11-967K21.1	9.30127e-50	1.18386	2.59729e-45
LAG3	9.29733e-58	-3.10045	2.59619e-53
SGCE	9.28906e-159	2.77773	2.59388e-154
CDH16	9.28905e-11	2.27239	2.59387e-06
ASTE1	9.28665e-16	-1.45788	2.5932e-11
MRVI1	9.28544e-11	2.85304	2.59287e-06
CASP2	9.28448e-21	-1.41651	2.5926e-16
IFI16	9.2809e-88	-1.15035	2.5916e-83
MATN2	9.28057e-86	3.79829	2.59151e-81
DOCK8	9.27683e-89	-2.5146	2.59046e-84
RP11-346D14.1	9.26914e-15	4.72977	2.58831e-10
CD19	9.26914e-15	4.56463	2.58831e-10
TM4SF5	9.26914e-15	4.23064	2.58831e-10
KC6	9.26914e-15	4.56206	2.58831e-10
LINC00683	9.26914e-15	4.59434	2.58831e-10
SEPT3	9.26914e-15	4.16374	2.58831e-10
NRCAM	9.26787e-76	6.94037	2.58796e-71
NEURL2	9.2659e-27	2.04259	2.58741e-22
TMEM35	9.26571e-36	4.37968	2.58736e-31
PROSER2	9.25675e-134	4.40824	2.58485e-129
NR1D1	9.25672e-127	1.22672	2.58485e-122
APOBEC3C	9.25356e-26	-1.86571	2.58396e-21
ITGA2	9.25037e-250	5.16396	2.58307e-245
KIAA1211L	9.24888e-134	3.06718	2.58266e-129
NMNAT3	9.24786e-48	3.03533	2.58237e-43
STX17-AS1	9.24645e-69	1.58939	2.58198e-64
TIAM1	9.24566e-45	1.0603	2.58176e-40
WDR72	9.24053e-76	7.02546	2.58033e-71
ARHGAP12	9.23171e-291	1.05435	2.57786e-286
ZNF311	9.22654e-35	2.65894	2.57642e-30
ARHGEF6	9.2246e-25	-2.63664	2.57588e-20
MAST1	9.21821e-28	5.35893	2.57409e-23
RP11-89M20.2	9.21821e-28	5.26435	2.57409e-23
RP11-128A17.1	9.21821e-28	5.63898	2.57409e-23
C2orf72	9.21764e-30	5.38788	2.57393e-25
MND1	9.21425e-24	1.56363	2.57299e-19
SLC37A1	9.20545e-286	1.54096	2.57053e-281
SHC3	9.20399e-149	4.72928	2.57012e-144
GOLGA8O	9.1976e-15	-4.8556	2.56834e-10
SNAPC1	9.19359e-252	1.11962	2.56722e-247
RP11-190C22.9	9.19079e-07	1.10951	0.0256644
RP11-500G10.5	9.19079e-07	1.21395	0.0256644
ZNF700	9.1907e-11	-1.5231	2.56641e-06
CTD-2561B21.11	9.19012e-40	1.47751	2.56625e-35
FOLR3	9.19001e-42	1.19022	2.56622e-37
KCNMB3	9.18456e-115	2.77659	2.5647e-110
NOS3	9.18238e-94	4.18402	2.56409e-89
ZFYVE9	9.18043e-161	3.09739	2.56354e-156
GJA1	9.17408e-157	3.46545	2.56177e-152
TCEAL5	9.1691e-37	6.44418	2.56038e-32
CH17-189H20.1	9.158e-20	-1.7938	2.55728e-15
BCL10	9.15444e-38	-1.03179	2.55629e-33
TMC7	9.15195e-108	6.10195	2.55559e-103
PAK4	9.14902e-144	1.13847	2.55477e-139
BAAT	9.14226e-56	6.90541	2.55288e-51
PATL2	9.14101e-77	-3.2461	2.55254e-72
HSD17B14	9.12583e-210	5.26343	2.5483e-205
RASIP1	9.12233e-09	1.07541	0.000254732
HLA-DQB2	9.12034e-35	3.63663	2.54676e-30
LSAMP	9.11596e-09	1.09846	0.000254554
ITGAV	9.10915e-244	1.48645	2.54364e-239
C18orf8	9.10776e-30	-1.11255	2.54325e-25
NDUFV2-AS1	9.1053e-17	-1.08938	2.54256e-12
CCND3	9.10253e-150	-1.80131	2.54179e-145
RP11-535A19.2	9.09885e-10	1.6386	2.54076e-05
LINC01607	9.09836e-63	6.71268	2.54063e-58
HKDC1	9.09836e-193	7.98244	2.54063e-188
NAV1	9.09715e-100	2.46498	2.54029e-95
LL0XNC01-237H1.2	9.0958e-32	1.90654	2.53991e-27
BIRC7	9.09577e-20	3.63558	2.5399e-15
OSR2	9.09366e-65	2.62557	2.53931e-60
CLMN	9.08894e-96	3.34419	2.538e-91
RP11-61A14.4	9.08861e-10	1.53646	2.5379e-05
ARHGAP6	9.07817e-14	1.76667	2.53499e-09
TMEM191B	9.0743e-206	1.09855	2.53391e-201
C1orf127	9.05392e-14	2.34166	2.52822e-09
SNRNP40	9.05154e-18	-1.34932	2.52755e-13
ZBED5-AS1	9.05087e-181	2.19579	2.52737e-176
FAM46B	9.04882e-85	7.68058	2.52679e-80
CYB5D2	9.04554e-283	1.28904	2.52588e-278
SIRT3	9.04003e-200	1.90955	2.52434e-195
KRBOX1	9.03913e-41	2.00013	2.52409e-36
RP5-1065J22.8	9.03761e-15	-1.34093	2.52366e-10
RNASEK	9.03301e-17	-1.23654	2.52238e-12
GRB10	9.03029e-133	4.06503	2.52162e-128
PRKD1	9.00176e-131	5.44334	2.51365e-126
OVOL2	8.99622e-144	5.0377	2.51211e-139
RP11-347C12.11	8.99376e-15	1.0809	2.51142e-10
SLC6A8	8.98918e-98	2.53858	2.51014e-93
GPR3	8.98371e-21	3.91643	2.50861e-16
PTPN20	8.98371e-21	3.69835	2.50861e-16
TLE6	8.98234e-71	5.28312	2.50823e-66
HEATR9	8.97984e-13	-3.86383	2.50753e-08
RAB37	8.97378e-99	-3.1331	2.50584e-94
ZNF788	8.97198e-25	2.02043	2.50534e-20
STARD13	8.9693e-41	1.73563	2.50459e-36
GIMAP2	8.96772e-47	-2.83615	2.50415e-42
TKTL1	8.96567e-32	-3.1966	2.50357e-27
OSBPL1A	8.96099e-290	3.84731	2.50227e-285
LINC01132	8.95641e-12	4.3504	2.50099e-07
ATP13A5	8.95641e-12	4.16947	2.50099e-07
RP11-496D24.2	8.95641e-12	4.71725	2.50099e-07
TCN1	8.95641e-12	5.73291	2.50099e-07
DRGX	8.95641e-12	3.9212	2.50099e-07
RIMBP2	8.95641e-12	4.24374	2.50099e-07
RASL10B	8.95641e-12	4.25516	2.50099e-07
CTD-2527I21.7	8.95641e-12	4.09294	2.50099e-07
SCML2	8.95641e-12	4.37689	2.50099e-07
FBN3	8.95641e-12	4.55427	2.50099e-07
SET	8.95398e-211	-1.39249	2.50031e-206
ZNF85	8.95357e-10	-1.51276	2.50019e-05
TFAP4	8.94986e-174	2.10337	2.49916e-169
CD1E	8.94113e-21	4.59401	2.49672e-16
ENTPD5	8.93308e-175	1.35278	2.49447e-170
TXNRD3	8.92437e-78	4.06972	2.49204e-73
LINC01207	8.92004e-237	6.31153	2.49083e-232
P3H4	8.9164e-182	1.11274	2.48982e-177
AMOTL1	8.91396e-260	3.53199	2.48913e-255
RP11-449J21.5	8.91339e-56	5.37182	2.48898e-51
CCNH	8.90107e-27	-1.17987	2.48553e-22
DAPP1	8.89579e-210	2.01363	2.48406e-205
ZNF28	8.8853e-25	-1.24387	2.48113e-20
PUDP	8.87952e-189	2.28039	2.47952e-184
SALL2	8.87924e-160	4.6843	2.47944e-155
SGSM2	8.87133e-300	1.3517	2.47723e-295
PTPRCAP	8.87101e-09	-3.29535	0.000247714
BOK-AS1	8.86861e-12	1.01324	2.47647e-07
C8orf34-AS1	8.86577e-49	3.26874	2.47568e-44
BMS1P14	8.86392e-08	1.82124	0.00247516
RP5-1120P11.1	8.8605e-08	2.18751	0.0024742
RP11-119D9.1	8.8605e-08	2.46889	0.0024742
RP11-596D21.1	8.8605e-08	2.1606	0.0024742
C9orf84	8.85708e-08	2.0058	0.00247325
SLC13A3	8.85495e-26	2.59752	2.47266e-21
APOO	8.85295e-146	1.12543	2.4721e-141
LINC01503	8.85142e-26	3.88009	2.47167e-21
ADGRL2	8.84789e-26	3.78531	2.47069e-21
LAMP3	8.84735e-246	1.96097	2.47053e-241
PCBD2	8.84554e-224	1.40948	2.47003e-219
C22orf29	8.84318e-237	1.77667	2.46937e-232
SGCD	8.8416e-25	-4.96976	2.46893e-20
ZMIZ2	8.83981e-275	1.13755	2.46843e-270
PKN1	8.83674e-15	-2.0269	2.46757e-10
SEC16B	8.81973e-26	4.44811	2.46282e-21
CNPY3	8.81921e-12	-1.3331	2.46268e-07
IGHA2	8.81661e-126	4.9876	2.46195e-121
AKIRIN2	8.81614e-17	-1.42694	2.46182e-12
ZNF541	8.81155e-08	1.31826	0.00246054
BMP4	8.80669e-259	6.17935	2.45918e-254
ADD3	8.80621e-91	-1.93247	2.45905e-86
RP11-473I1.5	8.80524e-12	-1.32673	2.45877e-07
CYTH1	8.80427e-62	-1.93611	2.45851e-57
DHX58	8.80358e-157	1.09816	2.45831e-152
AGT	8.80063e-55	5.10288	2.45749e-50
FASTKD3	8.79987e-11	-1.77336	2.45728e-06
IFFO1	8.79589e-27	-3.37258	2.45617e-22
LRRC3	8.79314e-42	3.19759	2.4554e-37
PILRB	8.79178e-20	-1.05166	2.45502e-15
NFE2L3	8.7833e-231	2.70794	2.45265e-226
VAV2	8.78207e-110	3.39042	2.45231e-105
MAD2L1	8.77372e-11	-1.24987	2.44997e-06
PRMT2	8.77289e-123	-1.61118	2.44974e-118
MYO15A	8.7728e-35	2.23238	2.44972e-30
LY6D	8.77104e-31	2.08261	2.44923e-26
NR2C2AP	8.77056e-34	-1.16528	2.44909e-29
BLOC1S3	8.7679e-10	-1.64521	2.44835e-05
FLT4	8.76043e-29	2.59913	2.44626e-24
RRAGA	8.75886e-37	-1.08336	2.44582e-32
RP11-320N7.2	8.75566e-24	5.1241	2.44493e-19
CDKAL1	8.74953e-21	-1.43112	2.44322e-16
LNPEP	8.74436e-52	-1.84653	2.44178e-47
CNTN5	8.74415e-20	2.3754	2.44172e-15
TBXAS1	8.74059e-29	-1.15506	2.44072e-24
RAPGEF4	8.73944e-13	1.54858	2.4404e-08
CFP	8.73763e-18	1.22194	2.43989e-13
ZNF132	8.73603e-37	2.16578	2.43945e-32
SATB1	8.73376e-21	-2.44016	2.43882e-16
ATP6V0A4	8.7335e-34	5.83321	2.43874e-29
TMEM220	8.72964e-194	2.45119	2.43767e-189
SYTL4	8.72582e-59	4.77172	2.4366e-54
CDH5	8.70702e-13	2.59029	2.43135e-08
AC006369.2	8.70046e-16	-3.63083	2.42952e-11
RP11-290C10.1	8.69872e-19	-3.01513	2.42903e-14
CYP46A1	8.6929e-25	2.07401	2.42741e-20
LRRC16B	8.68207e-08	-2.85705	0.00242438
AC011298.2	8.68127e-64	5.72333	2.42416e-59
BCL2	8.6742e-15	-2.43452	2.42218e-10
ARHGAP20	8.67365e-125	5.7348	2.42203e-120
GCLC	8.67067e-36	-1.04353	2.4212e-31
EPHB2	8.66549e-35	5.54925	2.41975e-30
BANP	8.66451e-36	-1.17746	2.41948e-31
MYOM2	8.66341e-108	-4.82511	2.41917e-103
MRPL12	8.66009e-300	1.15561	2.41824e-295
LINC01420	8.6562e-265	1.47166	2.41716e-260
NANOS3	8.64702e-12	1.90834	2.4146e-07
H2AFY2	8.62621e-59	1.05087	2.40878e-54
FUT2	8.62469e-144	3.86456	2.40836e-139
LONRF3	8.61973e-122	1.12529	2.40697e-117
C20orf96	8.60764e-98	1.37717	2.4036e-93
RP11-134G8.5	8.60363e-68	1.11628	2.40248e-63
RP11-54O7.1	8.60249e-09	4.10627	0.000240216
RP4-758J18.10	8.60249e-09	3.72649	0.000240216
RP11-89K21.1	8.60249e-09	3.13181	0.000240216
ALPPL2	8.60249e-09	4.11478	0.000240216
RP11-109J4.1	8.60249e-09	3.55369	0.000240216
SMOC2	8.60249e-09	4.13186	0.000240216
AC002456.2	8.60249e-09	3.55904	0.000240216
PHYHIPL	8.60249e-09	3.75604	0.000240216
LINC00923	8.60249e-09	3.80149	0.000240216
AP001434.2	8.60249e-09	3.62195	0.000240216
TAGLN2	8.59908e-286	1.48056	2.40121e-281
CELSR2	8.59286e-78	1.28272	2.39947e-73
IL7	8.58752e-85	1.5109	2.39798e-80
IFNG	8.58132e-186	-2.79634	2.39625e-181
CCDC117	8.58128e-48	-1.00109	2.39624e-43
TRAF5	8.57775e-07	-1.26255	0.0239525
PFKFB4	8.57642e-24	1.1248	2.39488e-19
LPCAT4	8.56809e-26	-1.01982	2.39255e-21
SLC25A39	8.56377e-265	1.00358	2.39135e-260
PCDH7	8.56063e-191	6.75592	2.39047e-186
TSPAN32	8.55425e-131	-3.45103	2.38869e-126
RP11-102N12.3	8.55313e-58	3.68347	2.38837e-53
RAB3IL1	8.55299e-34	4.005	2.38834e-29
RFFL	8.55251e-19	-1.38208	2.3882e-14
SMIM10L2B	8.55075e-11	1.45379	2.38771e-06
RP13-870H17.3	8.54955e-34	4.09995	2.38738e-29
ACVR1	8.54821e-232	2.24583	2.387e-227
PCDHGB4	8.54753e-11	1.36795	2.38681e-06
CTD-2020K17.4	8.5459e-95	3.5119	2.38636e-90
WNT5A-AS1	8.54582e-16	4.73997	2.38633e-11
PCDHB4	8.54582e-16	4.87189	2.38633e-11
HOXC13-AS	8.54582e-16	4.45006	2.38633e-11
INHBB	8.54516e-73	3.50003	2.38615e-68
LHFP	8.54457e-228	4.7607	2.38599e-223
ANKRD9	8.53989e-255	1.57828	2.38468e-250
SERPINB9	8.53888e-129	-3.11127	2.3844e-124
NWD1	8.5341e-27	2.79776	2.38306e-22
NGEF	8.53121e-123	7.55645	2.38225e-118
TRGV3	8.52643e-10	-3.2084	2.38092e-05
DEPTOR	8.52608e-129	4.16482	2.38082e-124
PSPH	8.52313e-121	1.76033	2.38e-116
HMOX1	8.51759e-17	-1.48315	2.37845e-12
PRELID3A	8.51551e-23	2.6789	2.37787e-18
TMEM132A	8.50896e-244	8.10644	2.37604e-239
MARVELD1	8.50843e-140	3.40218	2.37589e-135
FBLN7	8.50776e-58	3.88313	2.37571e-53
RP11-350N15.5	8.506e-12	-1.12845	2.37522e-07
MIR155HG	8.50018e-12	-1.42931	2.37359e-07
LL22NC03-75H12.2	8.49925e-92	4.54179	2.37333e-87
MAGI2	8.49681e-118	1.9816	2.37265e-113
TAS2R4	8.49286e-15	1.15244	2.37155e-10
SEMA3E	8.49196e-92	5.25325	2.3713e-87
ZMYM3	8.48088e-274	1.94502	2.3682e-269
SMPX	8.47908e-21	5.0042	2.3677e-16
IL15RA	8.47903e-15	-1.28546	2.36769e-10
AC007405.4	8.47459e-85	3.76217	2.36645e-80
RP11-325F22.2	8.46731e-16	-2.62692	2.36441e-11
DKFZP434I0714	8.46198e-13	-1.12317	2.36292e-08
USF1	8.45986e-26	-1.10918	2.36233e-21
RNF150	8.45248e-07	1.1576	0.0236027
MB	8.45248e-07	1.32729	0.0236027
MILR1	8.44077e-49	4.51404	2.357e-44
ATP2C2	8.43878e-278	4.52592	2.35645e-273
CABP4	8.42757e-56	1.63938	2.35331e-51
CYB5RL	8.42246e-62	1.45868	2.35189e-57
BBS12	8.42032e-15	-1.08166	2.35129e-10
PRR7	8.41658e-07	-1.66571	0.0235024
LPAR2	8.41613e-28	-1.24672	2.35012e-23
NUAK1	8.40885e-12	-1.88671	2.34809e-07
SYNPO2	8.40795e-15	2.74751	2.34784e-10
RP11-588G21.2	8.40781e-72	3.33883	2.3478e-67
ADPRHL1	8.40749e-75	3.46171	2.34771e-70
IGKC	8.40417e-256	1.60853	2.34678e-251
RP11-2C24.9	8.40129e-82	1.87473	2.34598e-77
OAZ3	8.4003e-155	3.63129	2.3457e-150
ZNF276	8.39847e-35	-2.17854	2.34519e-30
CTBP1-AS2	8.39773e-53	-1.03336	2.34498e-48
ITGA6	8.39378e-203	1.66434	2.34388e-198
KRTAP3-1	8.39184e-15	3.36299	2.34334e-10
SYT7	8.39055e-134	4.1996	2.34298e-129
UCHL1	8.38981e-44	4.58533	2.34277e-39
CRIP1	8.38234e-60	-1.22946	2.34068e-55
ATP5SL	8.36856e-40	-1.03555	2.33684e-35
FBLN1	8.36774e-73	3.52955	2.33661e-68
STARD4	8.36167e-27	-1.28894	2.33491e-22
SF3B5	8.36069e-20	-1.22813	2.33464e-15
RSG1	8.36048e-35	1.84566	2.33458e-30
RP11-44N21.1	8.3597e-68	2.71529	2.33436e-63
TANGO6	8.3554e-16	-1.20512	2.33316e-11
TNFRSF10B	8.35154e-239	1.00208	2.33209e-234
RAVER2	8.34609e-63	3.83349	2.33056e-58
MFNG	8.34288e-67	-3.1619	2.32966e-62
FILIP1	8.32833e-161	2.66488	2.3256e-156
UBE2Q2	8.32772e-18	-1.20537	2.32543e-13
FOXD3-AS1	8.32556e-22	4.98048	2.32483e-17
RP1-90J4.1	8.32556e-22	4.80672	2.32483e-17
ANXA10	8.32556e-22	4.91771	2.32483e-17
SLC8A2	8.32556e-22	5.04745	2.32483e-17
RP11-596C23.2	8.32374e-12	-1.37577	2.32432e-07
FAS	8.32356e-27	-1.19188	2.32427e-22
NYNRIN	8.32125e-177	6.48806	2.32363e-172
AGER	8.31612e-115	1.54984	2.32219e-110
SERHL2	8.31462e-24	1.08203	2.32177e-19
ASB9	8.31322e-229	6.63073	2.32138e-224
FUT3	8.31131e-164	6.56301	2.32085e-159
GUCA2A	8.30964e-13	4.07622	2.32038e-08
RP11-27G14.4	8.30964e-13	4.20709	2.32038e-08
GLRA3	8.30964e-13	4.25005	2.32038e-08
FXYD4	8.30964e-13	3.8984	2.32038e-08
RP11-319E16.2	8.30964e-13	4.39441	2.32038e-08
CLIC4	8.3096e-217	2.8038	2.32037e-212
APBA2	8.30431e-37	-2.8713	2.3189e-32
HOXB8	8.30229e-16	2.35072	2.31833e-11
SYNE3	8.30144e-14	-3.27288	2.31809e-09
TRIM32	8.30016e-18	-1.12921	2.31774e-13
RP11-277P12.6	8.29241e-10	-3.74186	2.31557e-05
MNX1-AS1	8.27547e-46	6.0533	2.31084e-41
LRRC73	8.27458e-17	2.13405	2.31059e-12
CA10	8.2727e-42	6.17926	2.31007e-37
LINC00858	8.2727e-42	6.24736	2.31007e-37
ZNF540	8.27216e-11	-1.22087	2.30992e-06
NKAIN2	8.2695e-36	5.92107	2.30918e-31
FNDC5	8.26892e-50	5.12001	2.30901e-45
PSMG3-AS1	8.2674e-117	1.75611	2.30859e-112
ENPP2	8.26649e-16	3.83368	2.30834e-11
PVT1	8.26459e-113	1.80437	2.3078e-108
LINC01579	8.26232e-80	5.50982	2.30717e-75
ESRP2	8.25956e-224	5.53495	2.3064e-219
C12orf4	8.25948e-13	-1.3253	2.30638e-08
GLS2	8.25019e-151	3.86433	2.30378e-146
RP11-291B21.2	8.24827e-29	-3.08797	2.30325e-24
FXN	8.23903e-31	-1.14767	2.30067e-26
LRRC29	8.23647e-39	1.09973	2.29995e-34
SH3TC1	8.23538e-113	1.3795	2.29965e-108
CYP1B1-AS1	8.23204e-09	2.07503	0.000229871
RP11-59D5--B.2	8.22885e-09	2.1581	0.000229783
BDKRB1	8.22885e-09	2.46408	0.000229783
RP11-506H21.5	8.22885e-09	1.9242	0.000229783
ZNF335	8.22864e-46	-1.0309	2.29777e-41
CAMSAP3	8.22849e-197	4.98203	2.29772e-192
LARP6	8.22415e-104	4.77181	2.29651e-99
SSTR2	8.22248e-09	2.43395	0.000229605
FAM150A	8.22127e-111	7.60638	2.29571e-106
SPATA6L	8.21837e-101	2.60099	2.2949e-96
ZNF107	8.21836e-07	-1.60929	0.022949
MPRIP	8.2177e-295	1.08453	2.29471e-290
NLRP1	8.20497e-20	-1.22699	2.29116e-15
RP4-694B14.8	8.20316e-14	1.93979	2.29065e-09
B3GNT3	8.20294e-83	5.19494	2.29059e-78
RGMB	8.20214e-214	5.57429	2.29036e-209
AVIL	8.2005e-160	3.11904	2.28991e-155
MMP2	8.19354e-35	2.48954	2.28797e-30
FEM1A	8.19095e-33	-1.19548	2.28724e-28
ST6GALNAC6	8.18973e-15	-1.41538	2.2869e-10
RALY-AS1	8.18888e-103	2.25185	2.28666e-98
ZNF860	8.18386e-24	1.93955	2.28526e-19
TBC1D24	8.17291e-196	1.55347	2.2822e-191
COMMD2	8.165e-35	-1.06161	2.27999e-30
TPPP	8.16375e-154	3.79911	2.27965e-149
RP11-793H13.11	8.16197e-13	-1.35742	2.27915e-08
PVRIG	8.15999e-12	-3.64786	2.2786e-07
TBC1D15	8.15994e-284	1.32041	2.27858e-279
RGAG4	8.15738e-85	1.73097	2.27787e-80
MPHOSPH6	8.14981e-33	-1.11093	2.27575e-28
RNF19A	8.14285e-26	-1.32263	2.27381e-21
KLHDC9	8.13574e-226	4.55501	2.27182e-221
REEP6	8.13417e-81	1.42267	2.27139e-76
PLEKHO1	8.13416e-30	-1.02766	2.27138e-25
COL4A3	8.1332e-227	5.98769	2.27112e-222
UBQLN4	8.1312e-203	1.02758	2.27056e-198
ZBTB2	8.12886e-08	-1.91148	0.0022699
DENND1C	8.12677e-50	-2.96654	2.26932e-45
SNRNP27	8.12631e-36	-1.01932	2.26919e-31
MOCOS	8.12626e-22	1.74322	2.26918e-17
KLHDC7A	8.12161e-144	6.1786	2.26788e-139
ADGRA3	8.11281e-199	3.91513	2.26542e-194
RP11-169D4.2	8.10875e-12	-5.15577	2.26429e-07
CD99L2	8.10498e-199	1.39026	2.26323e-194
TFPT	8.10388e-29	-1.17579	2.26293e-24
GCNT3	8.10155e-256	8.33615	2.26228e-251
RP11-268J15.5	8.10132e-52	5.10807	2.26221e-47
LINC00865	8.10109e-36	4.27128	2.26215e-31
CCR7	8.10019e-37	3.89297	2.2619e-32
PDE3B	8.08857e-32	-1.18864	2.25865e-27
RNGTT	8.08757e-13	-1.50672	2.25837e-08
SIRT4	8.08457e-07	-1.28925	0.0225753
SORBS1	8.07205e-291	4.07389	2.25404e-286
FOXQ1	8.06792e-29	5.60516	2.25289e-24
TENM3	8.06792e-29	5.35435	2.25289e-24
CYP1B1	8.06521e-173	3.39836	2.25213e-168
ITGA5	8.06107e-11	-2.40582	2.25097e-06
PGF	8.06078e-47	1.85186	2.25089e-42
AK4	8.05379e-75	2.68489	2.24894e-70
URM1	8.04932e-33	-1.13804	2.24769e-28
RP13-444H2.1	8.04618e-24	4.95613	2.24681e-19
SYT13	8.04609e-09	3.58686	0.000224679
DCAF15	8.04504e-07	-1.72783	0.022465
DCTN3	8.04345e-12	-1.64987	2.24605e-07
ZNF253	8.04274e-26	-1.03831	2.24586e-21
IL10RB-AS1	8.04154e-14	-1.07158	2.24552e-09
UMODL1	8.03882e-13	2.30601	2.24476e-08
SH2D3C	8.03865e-51	-3.35009	2.24471e-46
RP1-286D6.5	8.03568e-13	1.57423	2.24388e-08
KB-1562D12.1	8.03568e-13	2.58944	2.24388e-08
KLF12	8.03445e-89	-3.37567	2.24354e-84
SPRY4-IT1	8.03064e-128	5.55438	2.24247e-123
ALDH4A1	8.03063e-75	1.30339	2.24247e-70
ITGAM	8.02431e-75	-2.88901	2.24071e-70
MBTPS2	8.02379e-167	1.19387	2.24056e-162
C15orf48	8.02021e-186	1.80807	2.23956e-181
ZNF385A	8.01922e-100	1.37152	2.23929e-95
SETX	8.01828e-12	-1.70692	2.23902e-07
ICA1L	8.01684e-25	-1.0885	2.23862e-20
EPHB3	8.01474e-123	5.25105	2.23804e-118
LAMA4	8.0126e-67	5.40878	2.23744e-62
RASGRP2	8.01258e-109	-3.07559	2.23743e-104
AFF3	8.00574e-144	4.04991	2.23552e-139
SLC22A15	8.00534e-52	1.08324	2.23541e-47
GPR84	8.00341e-12	1.27868	2.23487e-07
RP11-2H8.2	8.00341e-12	1.95823	2.23487e-07
RPH3AL	8.00331e-307	2.73293	2.23484e-302
PEMT	7.99759e-208	1.34608	2.23325e-203
SLAMF9	7.99734e-12	2.06979	2.23318e-07
RP11-142A22.4	7.99209e-31	5.72525	2.23171e-26
NOX5	7.99209e-31	5.88446	2.23171e-26
GAL3ST1	7.99209e-31	5.4637	2.23171e-26
ADAMTS1	7.99057e-252	1.56736	2.23129e-247
SASS6	7.99033e-07	-1.71335	0.0223122
MTRNR2L1	7.98973e-26	3.01362	2.23105e-21
IGLC7	7.98973e-26	2.7418	2.23105e-21
ARHGEF40	7.98389e-102	2.93614	2.22942e-97
FCRL2	7.97673e-10	4.75831	2.22742e-05
SRGAP3-AS4	7.97673e-10	3.66629	2.22742e-05
HGFAC	7.97673e-10	4.36096	2.22742e-05
SYNPO2L	7.97673e-10	3.93452	2.22742e-05
AQP6	7.97673e-10	3.96157	2.22742e-05
GALNT16	7.97673e-10	4.06835	2.22742e-05
C19orf45	7.97673e-10	3.99392	2.22742e-05
ING3	7.97254e-41	-1.04158	2.22625e-36
RP11-1143G9.5	7.9699e-26	1.72965	2.22551e-21
ANTXR1	7.96957e-127	6.34217	2.22542e-122
SLC12A7	7.96161e-307	1.89323	2.2232e-302
RNF4	7.96062e-21	-1.22569	2.22292e-16
RP11-196G18.3	7.95965e-26	1.4899	2.22265e-21
PARD3B	7.95466e-205	5.92996	2.22126e-200
BIN1	7.95455e-26	-2.13018	2.22123e-21
SP2	7.95239e-41	-1.16491	2.22062e-36
C12orf65	7.95166e-33	-1.12294	2.22042e-28
EGR1	7.95154e-257	1.846	2.22039e-252
SMAD3	7.95085e-281	1.0869	2.2202e-276
SDPR	7.95062e-245	4.70742	2.22013e-240
TMTC1	7.93952e-08	1.18889	0.00221703
KLRG1	7.93554e-136	-3.67399	2.21592e-131
PRDM5	7.93522e-83	4.35778	2.21583e-78
PAK3	7.93365e-08	1.11661	0.00221539
CCDC68	7.93069e-136	2.85779	2.21456e-131
LPGAT1	7.92579e-09	-1.26367	0.00022132
PLEKHG1	7.92539e-167	3.8595	2.21308e-162
CAMKK1	7.92207e-100	3.69665	2.21216e-95
SIM2	7.92192e-08	1.62571	0.00221212
MLLT6	7.91576e-21	-1.18241	2.2104e-16
ZNF219	7.90821e-179	1.51815	2.20829e-174
SLC37A4	7.89968e-222	1.56388	2.20591e-217
APCDD1	7.89765e-176	5.60356	2.20534e-171
CCDC148	7.89595e-29	2.67783	2.20487e-24
ADGRG6	7.89077e-143	4.4748	2.20342e-138
TMEM25	7.88755e-215	1.79297	2.20252e-210
ZNF813	7.88716e-11	-1.80287	2.20241e-06
PDLIM1	7.8778e-293	1.13029	2.1998e-288
MLC1	7.87751e-177	-4.38703	2.19972e-172
NEDD4	7.87745e-94	1.47853	2.1997e-89
CCPG1	7.87106e-287	1.27157	2.19791e-282
PXN	7.86949e-10	-1.94551	2.19748e-05
PTAFR	7.86592e-27	1.13142	2.19648e-22
NELL2	7.86161e-20	1.1316	2.19528e-15
CCBE1	7.85775e-23	1.93073	2.1942e-18
UCN3	7.85488e-17	5.04544	2.1934e-12
RP11-519G16.5	7.85488e-17	5.25403	2.1934e-12
RP11-81H3.2	7.85488e-17	5.04295	2.1934e-12
ARHGEF1	7.84827e-96	-1.97931	2.19155e-91
GALNS	7.8344e-42	-1.0066	2.18768e-37
PPP3CC	7.83261e-18	-2.48188	2.18718e-13
STRADA	7.82403e-10	-1.24773	2.18478e-05
TAP1	7.8213e-56	-1.93888	2.18402e-51
NCAPD2	7.82028e-11	-1.6321	2.18373e-06
RNF138	7.81669e-33	-1.14901	2.18273e-28
SLC12A4	7.8158e-113	1.17894	2.18248e-108
CREB3L2	7.81313e-294	1.02056	2.18174e-289
C19orf43	7.81304e-144	-1.30747	2.18171e-139
FZD7	7.8044e-69	1.7746	2.1793e-64
CTSG	7.80338e-24	2.17739	2.17902e-19
FGD3	7.80296e-46	-2.70261	2.1789e-41
SERPINF1	7.80285e-31	1.06296	2.17887e-26
ZC3HAV1L	7.80219e-25	5.23846	2.17868e-20
ZNF407	7.80117e-15	-1.33563	2.1784e-10
SMC1B	7.80018e-36	3.70756	2.17812e-31
GLE1	7.78844e-32	-1.24163	2.17484e-27
DOK6	7.7792e-14	-3.19152	2.17226e-09
RNF144B	7.77889e-167	2.52487	2.17218e-162
TFIP11	7.77798e-21	-1.33316	2.17192e-16
CMB9-22P13.1	7.77729e-181	1.78742	2.17173e-176
AC005307.1	7.77555e-33	6.03733	2.17124e-28
RP4-621F18.2	7.76994e-45	6.42303	2.16968e-40
GPX8	7.76656e-118	4.77634	2.16873e-113
SRGAP3	7.76654e-168	2.6872	2.16873e-163
EIF5A2	7.76636e-34	-3.6283	2.16868e-29
REPS2	7.76604e-196	5.33072	2.16859e-191
FGL2	7.76481e-18	-2.19257	2.16825e-13
GSTM4	7.76327e-28	-1.01868	2.16781e-23
FBLIM1	7.76122e-210	4.23811	2.16724e-205
NDUFC1	7.75263e-308	1.34776	2.16484e-303
PYGB	7.74283e-308	1.13643	2.16211e-303
MYO3B	7.74281e-60	1.28479	2.1621e-55
MMS22L	7.74074e-13	-1.29665	2.16152e-08
FANK1	7.73903e-69	1.93415	2.16105e-64
PNKP	7.73155e-20	-1.27192	2.15896e-15
ANLN	7.72913e-17	1.56004	2.15828e-12
ZCCHC2	7.72698e-35	-1.11373	2.15768e-30
RNASEH2A	7.72551e-26	-1.37411	2.15727e-21
FAM120B	7.72496e-31	-1.16416	2.15712e-26
AMN1	7.72253e-185	1.23809	2.15644e-180
SDHAF2	7.72156e-15	-1.36064	2.15617e-10
MTO1	7.71641e-32	-1.19345	2.15473e-27
VAMP2	7.71223e-55	-1.02987	2.15356e-50
TUT1	7.7097e-126	1.04456	2.15286e-121
TOX	7.70883e-14	-1.49902	2.15261e-09
PGR	7.69686e-14	4.50476	2.14927e-09
RP11-517A5.7	7.69686e-14	4.63605	2.14927e-09
RP5-1180E21.5	7.68429e-13	-3.01783	2.14576e-08
ST7-AS1	7.68411e-46	3.15274	2.14571e-41
DNAH3	7.68401e-66	3.73722	2.14568e-61
ZNF830	7.68342e-31	-1.08942	2.14552e-26
TOP1MT	7.6831e-226	2.4784	2.14543e-221
LENG9	7.68265e-19	-1.01651	2.1453e-14
ETV2	7.682e-12	-1.16354	2.14512e-07
ORM2	7.68123e-50	6.86666	2.14491e-45
CCDC80	7.67345e-48	2.91439	2.14273e-43
CHIC2	7.67246e-14	-1.45279	2.14246e-09
SAMD9	7.67086e-125	-2.71997	2.14201e-120
MMP12	7.66612e-22	5.07057	2.14069e-17
GBP3	7.66586e-16	-1.27134	2.14062e-11
C14orf132	7.6576e-39	3.05798	2.13831e-34
CTIF	7.65472e-74	1.16748	2.1375e-69
FGFR2	7.65447e-132	3.59846	2.13744e-127
CCDC40	7.64046e-60	2.03489	2.13352e-55
CXCL3	7.6365e-155	1.39742	2.13242e-150
EPB41	7.63204e-17	-1.02423	2.13117e-12
ZNF596	7.62936e-11	-1.00122	2.13042e-06
AUH	7.62641e-41	-1.19253	2.1296e-36
G6PC3	7.62638e-290	1.66784	2.12959e-285
GOLT1A	7.62317e-281	4.59649	2.12869e-276
TFPI	7.6174e-269	5.02097	2.12708e-264
RGS7	7.61662e-33	3.37746	2.12687e-28
SLC39A10	7.61491e-16	-1.33574	2.12639e-11
HHLA2	7.6149e-88	4.46127	2.12639e-83
CASKIN2	7.61384e-120	3.56482	2.12609e-115
PLEKHG7	7.6105e-33	4.04836	2.12516e-28
NSUN7	7.60555e-159	4.23647	2.12377e-154
CITED1	7.60409e-48	4.33565	2.12337e-43
PCDH9	7.59999e-143	4.07819	2.12222e-138
ABHD11-AS1	7.59968e-204	4.18623	2.12214e-199
MAPKAPK5	7.59904e-50	-1.03203	2.12196e-45
GNGT1	7.59777e-100	7.36706	2.1216e-95
GABPB1	7.5949e-07	-1.91129	0.021208
RP11-1391J7.1	7.5893e-45	2.40245	2.11924e-40
RP11-222K16.2	7.58895e-102	-3.67872	2.11914e-97
TMEM17	7.58529e-56	2.78655	2.11812e-51
MMP25-AS1	7.58347e-11	-1.52365	2.11761e-06
ZNF713	7.583e-57	1.92978	2.11748e-52
SALL4	7.57631e-29	2.63086	2.11561e-24
RP11-54O7.17	7.57202e-36	1.35474	2.11441e-31
CLUAP1	7.57163e-248	1.24286	2.1143e-243
RBM15	7.56673e-20	-1.38823	2.11293e-15
RASA1	7.56601e-253	1.13106	2.11273e-248
SMAP2	7.56007e-23	-1.08853	2.11107e-18
DYRK1B	7.55774e-13	-1.59656	2.11042e-08
FZD1	7.5564e-167	6.34392	2.11005e-162
FOSB	7.55195e-151	1.25103	2.10881e-146
ARHGEF10	7.55027e-109	1.73571	2.10834e-104
KCTD14	7.54956e-254	6.49387	2.10814e-249
LILRB1	7.54715e-127	-3.66386	2.10747e-122
ACP6	7.54713e-164	1.77872	2.10746e-159
PID1	7.54389e-173	3.50998	2.10656e-168
TMEM203	7.5382e-23	-1.40469	2.10497e-18
COL27A1	7.53701e-239	4.39939	2.10463e-234
GSDMB	7.53392e-237	1.3878	2.10377e-232
GPR39	7.53204e-120	5.0181	2.10325e-115
LINC00869	7.52955e-27	-2.43568	2.10255e-22
TMEM88	7.52719e-62	1.55235	2.10189e-57
SFT2D3	7.52693e-37	-1.1035	2.10182e-32
STRAP	7.52658e-12	-1.20256	2.10172e-07
WDR37	7.52599e-16	-1.52438	2.10156e-11
ZNF566	7.52562e-26	-1.04522	2.10145e-21
DIAPH3	7.52336e-32	2.94993	2.10082e-27
C1QTNF6	7.52137e-86	1.76309	2.10027e-81
LURAP1L	7.51719e-256	4.38384	2.0991e-251
C4BPB	7.51666e-127	5.70892	2.09895e-122
CANX	7.51489e-272	1.06082	2.09846e-267
TRAPPC10	7.51278e-13	-2.10077	2.09787e-08
RP11-469H8.6	7.50433e-171	7.37617	2.09551e-166
PLEKHG6	7.50377e-42	2.26039	2.09535e-37
RP11-398K22.12	7.49588e-08	-1.25082	0.00209315
PI4K2B	7.4904e-233	1.21127	2.09162e-228
EBF4	7.48619e-173	1.33488	2.09044e-168
GPX2	7.48547e-20	2.44316	2.09024e-15
LYSMD2	7.4849e-09	-1.60968	0.000209008
NGF	7.48218e-23	5.11921	2.08932e-18
LINC00571	7.48218e-23	5.15108	2.08932e-18
KLHL13	7.47938e-13	1.85834	2.08854e-08
DBNDD1	7.47749e-55	6.04383	2.08801e-50
RAP2B	7.47283e-93	-2.69814	2.08671e-88
ALPK1	7.47016e-276	4.69271	2.08597e-271
RP11-259K15.2	7.46981e-180	4.12634	2.08587e-175
CCDC85B	7.46873e-36	-1.60338	2.08557e-31
MUC5B	7.46661e-26	4.19263	2.08498e-21
SCNN1G	7.46438e-41	1.85251	2.08435e-36
F3	7.4636e-147	1.72647	2.08414e-142
ZNF354C	7.46265e-17	-1.0404	2.08387e-12
CNNM4	7.46199e-142	1.24762	2.08369e-137
C6orf99	7.45923e-09	1.04756	0.000208292
EVPLL	7.459e-55	6.34455	2.08285e-50
RP3-525N10.2	7.4586e-14	1.60902	2.08274e-09
RP3-508I15.21	7.45845e-52	1.40171	2.0827e-47
RP11-89K10.1	7.45568e-14	2.90648	2.08192e-09
SPRR2A	7.45379e-13	1.65329	2.0814e-08
PLD6	7.45241e-116	1.92913	2.08101e-111
CHML	7.44738e-144	1.34426	2.07961e-139
WNT9A	7.44693e-14	3.70717	2.07948e-09
SPATA17	7.44665e-19	1.17709	2.0794e-14
CHDH	7.44489e-254	5.82737	2.07891e-249
LINC01239	7.4411e-14	3.41866	2.07785e-09
SCN8A	7.43626e-31	1.16514	2.0765e-26
RP11-327P2.5	7.43545e-12	-1.0958	2.07627e-07
AC145124.2	7.43434e-55	1.50139	2.07597e-50
BCL2L14	7.42717e-35	5.69784	2.07396e-30
KCNG2	7.42717e-35	5.42278	2.07396e-30
PHLPP1	7.41839e-141	1.58397	2.07151e-136
FAM171B	7.41836e-59	4.70975	2.0715e-54
TBC1D16	7.41829e-107	4.36744	2.07148e-102
C1orf21	7.41373e-28	-1.66275	2.07021e-23
AZGP1	7.40852e-181	5.91264	2.06876e-176
CADPS	7.40669e-11	4.19877	2.06824e-06
PCDHA4	7.40669e-11	4.10284	2.06824e-06
LRRC4C	7.40669e-11	4.07163	2.06824e-06
RP11-114G22.1	7.40669e-11	4.50863	2.06824e-06
WI2-85898F10.1	7.40669e-11	3.8742	2.06824e-06
RP1-101D8.1	7.40669e-11	4.3699	2.06824e-06
RP11-589C21.6	7.40223e-11	-3.8398	2.067e-06
UBE2E2	7.40079e-169	2.67845	2.0666e-164
HSPA4L	7.39963e-126	3.86644	2.06627e-121
HNF4G	7.39844e-66	6.54693	2.06594e-61
LINC00884	7.39741e-56	2.8551	2.06565e-51
PPA2	7.39366e-291	1.2539	2.06461e-286
HSBP1	7.39101e-262	1.15334	2.06387e-257
MGAT5	7.3897e-242	1.83775	2.0635e-237
UBL7-AS1	7.38903e-14	-1.31436	2.06331e-09
ZNF579	7.38198e-214	1.68959	2.06134e-209
IL20RA	7.38003e-56	2.12395	2.0608e-51
TTR	7.37991e-36	8.33758	2.06077e-31
DDHD2	7.36956e-15	-1.36258	2.05788e-10
SMAD1	7.3669e-203	4.9502	2.05713e-198
WAS	7.36621e-186	-3.28003	2.05694e-181
CDC42BPG	7.36247e-81	1.92803	2.05589e-76
CECR7	7.36235e-96	2.86217	2.05586e-91
TEKT2	7.36219e-19	1.17805	2.05582e-14
AMPD3	7.35974e-93	1.91868	2.05513e-88
RP11-120K24.3	7.35621e-07	1.46717	0.0205415
RP11-234K24.6	7.35621e-07	1.36162	0.0205415
ADGRE5	7.35344e-170	-2.43308	2.05337e-165
NLRC5	7.35052e-34	-2.57067	2.05256e-29
GALNT14	7.34773e-07	2.2997	0.0205178
PRODH	7.34494e-49	6.72803	2.051e-44
JMJD1C-AS1	7.34122e-19	1.20526	2.04996e-14
CFB	7.33991e-176	5.6316	2.0496e-171
SEMA3F	7.33788e-125	5.72821	2.04903e-120
NT5DC3	7.33718e-53	1.81624	2.04884e-48
ANKRD1	7.33644e-07	3.54163	0.0204863
ST8SIA6	7.3313e-46	-3.77074	2.04719e-41
ANKRD18A	7.32438e-34	2.35792	2.04526e-29
FAM81B	7.32342e-47	1.73552	2.04499e-42
APTR	7.32286e-273	2.21391	2.04484e-268
FAM122C	7.31992e-19	-1.09722	2.04401e-14
IL13	7.3111e-07	4.18539	0.0204155
AGAP3	7.3078e-304	1.98922	2.04063e-299
SLC27A1	7.30693e-110	1.25218	2.04039e-105
IRS1	7.30613e-135	6.63233	2.04016e-130
PNPO	7.30424e-166	1.45729	2.03964e-161
FGD1	7.3021e-50	3.91507	2.03904e-45
PIP5KL1	7.30186e-155	5.44325	2.03897e-150
ARHGEF17	7.29722e-167	4.51759	2.03767e-162
RP11-307B6.3	7.29535e-23	3.79735	2.03715e-18
PYCRL	7.2938e-107	1.25139	2.03672e-102
PAQR5	7.29172e-58	2.70912	2.03614e-53
RUNDC3A	7.28968e-17	4.5909	2.03557e-12
PDE7B	7.27952e-25	3.37464	2.03273e-20
RP11-506F3.1	7.27401e-29	5.04245	2.0312e-24
OSBP2	7.27163e-37	2.0663	2.03053e-32
CTB-91J4.1	7.2672e-22	-5.44162	2.02929e-17
BEX1	7.2634e-44	6.9203	2.02823e-39
RCAN3	7.25643e-199	1.98868	2.02628e-194
BLNK	7.24981e-122	3.60876	2.02444e-117
PKMYT1	7.24448e-08	1.14757	0.00202295
LL22NC03-N95F10.1	7.24444e-106	5.86454	2.02294e-101
TRIM28	7.24215e-267	1.01142	2.0223e-262
KRT86	7.24077e-10	-1.06189	2.02191e-05
TMPRSS5	7.2395e-08	1.14565	0.00202156
LL22NC03-86G7.1	7.23892e-09	-1.21576	0.00020214
DCLRE1C	7.23424e-28	-1.19038	2.02009e-23
HAMP	7.23202e-08	1.01349	0.00201947
RP11-700J17.2	7.22938e-10	1.09682	2.01873e-05
ANPEP	7.22751e-52	1.48157	2.01821e-47
OTUD6B-AS1	7.22515e-08	-1.05613	0.00201755
TM4SF18	7.21911e-93	6.31258	2.01586e-88
AGTPBP1	7.21628e-23	-2.56757	2.01507e-18
TMEM220-AS1	7.21175e-18	1.11266	2.01381e-13
LMLN	7.2098e-149	1.91016	2.01326e-144
RP11-315I20.1	7.20636e-18	1.30821	2.0123e-13
C3orf14	7.20557e-306	2.63488	2.01208e-301
ADA	7.20414e-40	-2.91383	2.01168e-35
APOBEC3F	7.198e-20	-1.20935	2.00997e-15
PLOD1	7.19748e-223	1.1446	2.00982e-218
MMP14	7.19737e-70	2.40397	2.00979e-65
RP11-497G19.2	7.19548e-18	5.01631	2.00926e-13
ONECUT2	7.19548e-18	5.21239	2.00926e-13
LINC01273	7.19548e-18	4.58667	2.00926e-13
ZNF714	7.19498e-168	1.44476	2.00913e-163
BSPRY	7.19427e-274	3.02324	2.00893e-269
RP11-806H10.4	7.19245e-20	3.71155	2.00842e-15
FAXDC2	7.18903e-192	4.406	2.00747e-187
BCL2L2	7.18856e-138	1.27681	2.00733e-133
CA9	7.18458e-49	5.0831	2.00622e-44
PTPRD	7.18407e-20	3.28559	2.00608e-15
RPS6KA3	7.17817e-301	1.19785	2.00443e-296
RMI2	7.17804e-57	2.97114	2.0044e-52
RP11-398E10.1	7.17595e-31	5.45266	2.00381e-26
PRKX	7.17267e-15	-1.41902	2.0029e-10
FAM188B	7.17101e-86	3.57821	2.00243e-81
FBXO36	7.17079e-57	1.34792	2.00237e-52
NOXA1	7.16635e-78	1.65835	2.00113e-73
ZNF22	7.16593e-24	-1.08017	2.00101e-19
AC007246.3	7.16339e-239	2.44594	2.0003e-234
KIAA1456	7.15399e-12	1.77464	1.99768e-07
NAA16	7.14799e-21	-1.25118	1.99601e-16
CD1B	7.14237e-08	4.52852	0.00199444
C1orf229	7.14237e-08	3.68879	0.00199444
TRPM8	7.14237e-08	3.37712	0.00199444
PCDHA13	7.14237e-08	3.31863	0.00199444
FABP7	7.14237e-08	3.20121	0.00199444
DLG3-AS1	7.14237e-08	3.72512	0.00199444
SAMD12-AS1	7.14237e-08	3.66788	0.00199444
FREM1	7.14237e-08	3.77817	0.00199444
RP1-122P22.2	7.14237e-08	3.38296	0.00199444
PARP3	7.1385e-203	2.35292	1.99335e-198
PCYT1A	7.13354e-32	-1.20052	1.99197e-27
RAB38	7.13285e-219	2.04195	1.99178e-214
POU3F2	7.13267e-11	2.99408	1.99173e-06
APLP1	7.13267e-11	2.74735	1.99173e-06
TRNP1	7.13171e-45	2.94804	1.99146e-40
RP11-131L23.1	7.1299e-11	2.6946	1.99095e-06
CTTNBP2NL	7.12882e-189	4.55413	1.99065e-184
BAMBI	7.12429e-146	3.53814	1.98939e-141
CCNB2	7.12405e-23	1.91042	1.98932e-18
ATXN7L1	7.11818e-20	-1.15571	1.98768e-15
SLC46A1	7.11539e-160	4.52412	1.9869e-155
SIX2	7.11418e-46	5.7519	1.98656e-41
AC240274.1	7.11336e-162	2.0779	1.98633e-157
C15orf59	7.11325e-15	4.52533	1.98631e-10
TRNT1	7.10823e-38	-1.04334	1.9849e-33
DOK3	7.10769e-27	1.64637	1.98475e-22
DIAPH1	7.10211e-21	-1.26943	1.98319e-16
TTC5	7.09833e-19	-1.37682	1.98214e-14
ARHGAP9	7.09632e-99	-2.72619	1.98158e-94
PLA1A	7.0863e-101	4.36452	1.97878e-96
CCNG2	7.08247e-248	1.08023	1.97771e-243
CHADL	7.08239e-186	6.40725	1.97769e-181
CD2	7.08217e-251	-2.82294	1.97763e-246
MYD88	7.07898e-34	-1.21041	1.97673e-29
SPINK13	7.07746e-67	6.94128	1.97631e-62
CACNA1D	7.07738e-120	5.78671	1.97629e-115
USPL1	7.07648e-27	-1.08252	1.97604e-22
ZNF641	7.07508e-34	-1.16348	1.97565e-29
ZNF90	7.07446e-135	1.94241	1.97547e-130
F13A1	7.07416e-18	2.00757	1.97539e-13
RTN4RL2	7.07255e-217	4.18522	1.97494e-212
TRIM22	7.06726e-11	-1.41212	1.97346e-06
TMEM52	7.06687e-54	1.32162	1.97335e-49
GLB1L2	7.06536e-105	1.38178	1.97293e-100
EPN3	7.06508e-100	5.47919	1.97285e-95
SMAD2	7.06365e-42	-1.00092	1.97245e-37
CTB-92J24.3	7.06248e-21	4.91749	1.97213e-16
GNPDA1	7.05766e-267	1.18302	1.97078e-262
ANKRD26	7.05274e-201	1.00961	1.96941e-196
DMD	7.04745e-56	2.55469	1.96793e-51
CTD-2357A8.3	7.04734e-58	1.68682	1.9679e-53
PEX10	7.04032e-219	1.77954	1.96594e-214
MYLK	7.03979e-23	2.05397	1.96579e-18
RP11-273G15.2	7.03487e-59	6.60285	1.96442e-54
EN2	7.03487e-59	6.35822	1.96442e-54
LINC00632	7.0341e-28	5.36706	1.9642e-23
SOWAHB	7.02638e-30	5.36077	1.96205e-25
RP11-16K12.1	7.02617e-60	7.12605	1.96199e-55
KIF19	7.02585e-22	-2.85089	1.9619e-17
C1orf61	7.01866e-13	-3.14614	1.95989e-08
POC5	7.01645e-29	-1.22845	1.95927e-24
TEF	7.01394e-210	2.57381	1.95857e-205
SPACA3	7.01116e-58	7.04317	1.9578e-53
KCTD17	7.00738e-15	-1.39939	1.95674e-10
EPSTI1	7.00665e-44	-2.63853	1.95654e-39
RP11-486O12.2	6.9988e-08	-1.11069	0.00195435
L2HGDH	6.99767e-74	1.41928	1.95403e-69
TTC23	6.99685e-129	4.3096	1.9538e-124
BRCA1	6.99416e-10	-1.29086	1.95305e-05
TSPAN5	6.98794e-228	1.04359	1.95131e-223
NIN	6.98737e-19	-1.24531	1.95115e-14
FAM179A	6.98537e-55	-3.52705	1.9506e-50
MAP3K15	6.98524e-10	2.15967	1.95056e-05
ZNF780B	6.98087e-20	-1.18527	1.94934e-15
AC145212.2	6.97528e-28	1.57318	1.94778e-23
ZNRF3	6.97518e-219	5.18733	1.94775e-214
MARK1	6.97091e-83	6.78569	1.94656e-78
ZNF264	6.96903e-29	-1.39438	1.94603e-24
CFAP57	6.9685e-185	4.02627	1.94588e-180
MPI	6.96723e-226	1.107	1.94553e-221
TSFM	6.96703e-295	1.78158	1.94547e-290
C14orf80	6.96087e-29	-1.07485	1.94375e-24
AXIN1	6.95906e-27	-1.37348	1.94325e-22
CREB3L4	6.95794e-180	1.48333	1.94294e-175
SLITRK6	6.95333e-100	5.82918	1.94165e-95
AC084809.3	6.95322e-12	1.55179	1.94162e-07
KANK2	6.94882e-233	4.00395	1.94039e-228
TOMM5	6.944e-47	-1.18128	1.93904e-42
WNT10A	6.94295e-81	2.69479	1.93875e-76
TNFSF14	6.94163e-43	-2.29464	1.93838e-38
PVRL1	6.93689e-51	-1.16394	1.93706e-46
TBCC	6.93683e-11	-1.52619	1.93704e-06
PRDM4	6.93228e-31	-1.23674	1.93577e-26
NACAD	6.93168e-22	1.6616	1.9356e-17
CEP170B	6.93162e-284	4.64946	1.93558e-279
RAPGEFL1	6.92994e-46	1.00239	1.93512e-41
RP11-620J15.3	6.9281e-307	2.16418	1.9346e-302
STAC	6.92762e-27	1.64512	1.93447e-22
RACGAP1	6.9236e-23	-1.02945	1.93335e-18
CYSRT1	6.92033e-26	5.45571	1.93243e-21
MGAT2	6.91638e-50	-1.07496	1.93133e-45
CPAMD8	6.91451e-116	2.49544	1.93081e-111
LCNL1	6.91208e-24	-4.53991	1.93013e-19
TMEM184A	6.91194e-266	3.61196	1.93009e-261
ADCY7	6.91064e-10	-2.10549	1.92973e-05
SAMD13	6.91021e-41	2.9435	1.92961e-36
LDHA	6.90929e-245	1.18312	1.92935e-240
TSHZ3	6.90333e-14	-3.49346	1.92769e-09
RP11-67L3.4	6.90295e-15	2.91684	1.92758e-10
NOV	6.90295e-15	2.06795	1.92758e-10
MESP2	6.90101e-59	3.5662	1.92704e-54
RP3-403A15.5	6.90024e-15	3.06786	1.92682e-10
RP5-1033H22.2	6.89754e-15	2.88205	1.92607e-10
SDC3	6.89644e-295	5.98438	1.92576e-290
PPFIA4	6.89456e-32	6.29085	1.92524e-27
C11orf45	6.89456e-32	5.68451	1.92524e-27
SLC9A2	6.89456e-32	5.72472	1.92524e-27
ENTPD1-AS1	6.89386e-18	-1.20436	1.92504e-13
CFTR	6.89044e-102	4.10932	1.92409e-97
H2AFZ	6.88948e-70	-1.1822	1.92382e-65
POSTN	6.88942e-15	3.1484	1.9238e-10
WAPL	6.88825e-28	-1.05189	1.92348e-23
CRAT37	6.88709e-21	3.39729	1.92315e-16
RERG	6.88684e-18	4.29444	1.92308e-13
ZNF567	6.88308e-10	-1.62706	1.92203e-05
CNGB1	6.88147e-44	3.92909	1.92158e-39
KIAA1161	6.87961e-28	3.77049	1.92106e-23
IFNL1	6.87823e-10	-3.3594	1.92068e-05
AC005609.20	6.87752e-12	3.95394	1.92048e-07
PRTN3	6.87752e-12	3.92957	1.92048e-07
KIAA2022	6.8687e-56	6.60708	1.91802e-51
RPF1	6.86831e-33	-1.11183	1.91791e-28
ATP11B	6.86546e-32	-1.06433	1.91711e-27
FBXO6	6.86416e-25	-1.21785	1.91675e-20
RNASE6	6.85926e-80	1.83235	1.91538e-75
FAM126A	6.85907e-38	-1.02498	1.91533e-33
NSUN3	6.8546e-16	-1.49712	1.91408e-11
ATP8B4	6.85332e-14	-2.72807	1.91372e-09
KPNA3	6.85064e-16	-1.47963	1.91297e-11
CHST2	6.84702e-61	-3.10729	1.91196e-56
BCO2	6.83678e-09	-1.20489	0.00019091
DEGS2	6.83537e-21	-1.56658	1.90871e-16
SPCS3	6.83278e-26	-1.56242	1.90798e-21
TDRD10	6.82735e-69	4.33643	1.90647e-64
DUSP11	6.82474e-33	-1.25391	1.90574e-28
ANO9	6.8211e-197	2.9984	1.90472e-192
PLCB3	6.82071e-141	1.71784	1.90462e-136
TPPP3	6.81141e-155	1.15821	1.90202e-150
ADRBK2	6.81025e-137	2.43016	1.90169e-132
RNF213	6.80877e-294	-1.40729	1.90128e-289
RP11-107N15.1	6.80568e-08	1.51493	0.00190042
GCM1	6.80305e-08	2.04218	0.00189968
HEXIM2	6.8024e-99	1.06766	1.8995e-94
MIR3681HG	6.80043e-08	2.11861	0.00189895
FOSL2	6.79215e-25	-1.05711	1.89664e-20
SNX20	6.78805e-58	-3.13253	1.89549e-53
LINC00240	6.78304e-63	2.01301	1.89409e-58
RP11-138I1.2	6.7771e-09	-3.25263	0.000189244
TRIM31	6.77591e-08	1.01931	0.0018921
CCL17	6.77562e-57	5.69042	1.89202e-52
AC002467.7	6.77304e-15	-1.11494	1.8913e-10
AMZ1	6.7668e-10	1.44577	1.88956e-05
RP11-736K20.6	6.76671e-26	3.35565	1.88954e-21
HYAL1	6.76383e-25	4.00209	1.88873e-20
RP4-639F20.1	6.76192e-62	2.67104	1.8882e-57
HOXC13	6.76034e-43	5.99279	1.88776e-38
ZP3	6.75862e-26	3.7076	1.88728e-21
CXCL2	6.75657e-253	2.63123	1.8867e-248
TFDP2	6.74596e-13	-1.57793	1.88374e-08
CDCA4	6.74312e-28	-1.21635	1.88295e-23
GPR65	6.74158e-249	-3.60054	1.88252e-244
ZNF782	6.73978e-09	-1.08339	0.000188202
OVOS2	6.73886e-32	3.79602	1.88176e-27
SLC1A3	6.7377e-13	1.43492	1.88143e-08
ZNF304	6.73451e-56	1.16076	1.88055e-51
IGHA1	6.72844e-266	3.14475	1.87885e-261
MORN2	6.72742e-200	1.24531	1.87856e-195
RP11-973H7.1	6.72572e-10	-3.40905	1.87809e-05
LLNLR-245B6.1	6.72207e-209	1.07729	1.87707e-204
HDC	6.72143e-10	1.19461	1.87689e-05
FAM63A	6.71965e-123	2.14225	1.87639e-118
ARG2	6.71277e-118	1.92778	1.87447e-113
ZZEF1	6.70981e-40	-1.04323	1.87365e-35
CLDN6	6.70884e-14	3.15531	1.87338e-09
FARSB	6.70802e-164	1.062	1.87315e-159
AC072062.1	6.69917e-49	3.52768	1.87068e-44
DNAJC3-AS1	6.69835e-144	1.24677	1.87045e-139
ADAM8	6.69514e-14	-1.82486	1.86955e-09
SCN2B	6.69441e-24	5.60452	1.86935e-19
KITLG	6.68503e-195	4.9741	1.86673e-190
ZDHHC11	6.6829e-144	3.74489	1.86613e-139
ZBTB18	6.68278e-303	2.66053	1.8661e-298
LGALS1	6.68037e-304	-2.49827	1.86543e-299
EXOC8	6.68006e-47	-1.04196	1.86534e-42
KLHL28	6.67916e-48	-1.05891	1.86509e-43
DHRSX	6.67897e-282	2.04637	1.86504e-277
RP11-727F15.12	6.67811e-12	-1.30171	1.8648e-07
LA16c-380H5.5	6.67454e-64	6.78111	1.8638e-59
CCP110	6.67361e-307	1.42695	1.86354e-302
RAB31	6.67272e-237	3.17373	1.86329e-232
SLC29A1	6.66826e-308	3.30451	1.86204e-303
DDX28	6.66732e-14	-1.66875	1.86178e-09
RARRES2	6.66413e-116	2.81878	1.86089e-111
ADGRG1	6.66169e-298	-2.98838	1.86021e-293
TRIM14	6.65322e-26	-1.29643	1.85784e-21
MYCL	6.64885e-93	4.83634	1.85662e-88
FSD1	6.64723e-14	-3.42063	1.85617e-09
TFAP2D	6.6431e-34	5.71217	1.85502e-29
ZNF185	6.6394e-145	3.63095	1.85399e-140
HEATR5A	6.63821e-162	1.02666	1.85365e-157
FAM229B	6.63216e-137	1.32346	1.85197e-132
IGHG1	6.6316e-169	3.27465	1.85181e-164
SASH3	6.62615e-279	-3.63476	1.85029e-274
LINC00470	6.62426e-17	1.86441	1.84976e-12
TTC16	6.62399e-84	-3.10537	1.84968e-79
SLC7A6OS	6.6227e-18	-1.47994	1.84932e-13
RP11-715J22.3	6.62204e-18	2.29265	1.84914e-13
C9orf85	6.61967e-15	-1.55156	1.84848e-10
C14orf142	6.61864e-38	-1.0728	1.84819e-33
C11orf21	6.61813e-167	-3.62714	1.84805e-162
PPP1R3F	6.61764e-60	1.12089	1.84791e-55
GPR173	6.61692e-18	2.99311	1.84771e-13
TPM3	6.61537e-266	-1.3403	1.84728e-261
FAM89A	6.61428e-211	1.6546	1.84697e-206
IDUA	6.61263e-256	1.90385	1.84651e-251
ACOT11	6.61172e-68	3.5508	1.84626e-63
PLA2G3	6.61098e-30	2.93177	1.84605e-25
MMEL1	6.60991e-186	5.0978	1.84575e-181
DCLK2	6.60924e-18	2.66368	1.84557e-13
PSMD6-AS2	6.60596e-07	-1.33911	0.0184465
FAM20C	6.60574e-131	4.39736	1.84459e-126
CCK	6.60413e-09	4.46748	0.000184414
RP11-542G1.1	6.60413e-09	3.43052	0.000184414
TMEM155	6.60413e-09	3.92336	0.000184414
AC005537.2	6.60413e-09	3.20265	0.000184414
ASIC1	6.60413e-09	3.3637	0.000184414
GDF5	6.60413e-09	3.68024	0.000184414
RP11-420A23.1	6.60307e-46	3.2708	1.84384e-41
GAS8	6.60288e-135	3.5402	1.84379e-130
TBC1D9	6.60171e-287	4.61938	1.84346e-282
SYTL3	6.59473e-89	-2.69721	1.84151e-84
STARD4-AS1	6.5884e-43	2.21738	1.83975e-38
MTMR14	6.58786e-42	-1.01647	1.83959e-37
ZNF57	6.57407e-12	-1.00791	1.83574e-07
ATP6AP1L	6.57207e-98	1.40593	1.83518e-93
KLK7	6.57185e-13	3.25346	1.83512e-08
HLX	6.57077e-11	1.39615	1.83482e-06
MIR762HG	6.56929e-24	-1.09859	1.83441e-19
EXOSC6	6.56718e-09	-1.57178	0.000183382
YIPF3	6.56572e-280	1.11839	1.83341e-275
C8orf82	6.56564e-287	1.21198	1.83339e-282
ROMO1	6.56404e-250	1.09203	1.83294e-245
ESYT3	6.56309e-264	5.62035	1.83268e-259
MT1F	6.5626e-45	-1.57986	1.83254e-40
ACPP	6.55852e-82	4.8448	1.8314e-77
TSKU	6.55732e-191	6.0938	1.83107e-186
ECEL1	6.55606e-16	4.65164	1.83071e-11
CCR9	6.55606e-16	4.82725	1.83071e-11
MB21D2	6.55606e-16	4.27816	1.83071e-11
AP3B2	6.55606e-16	4.75505	1.83071e-11
RP11-69E11.4	6.55318e-45	1.27831	1.82991e-40
RP11-242J7.1	6.55285e-21	2.58233	1.82982e-16
CEP112	6.55017e-175	5.13784	1.82907e-170
MTMR9	6.54851e-10	-1.69319	1.82861e-05
SLIT2	6.54744e-82	4.89638	1.82831e-77
RASSF5	6.54522e-69	-2.41379	1.82769e-64
CTB-50L17.14	6.54461e-59	5.20516	1.82752e-54
RNF165	6.54242e-41	-3.35875	1.82691e-36
LRP4	6.53814e-24	3.49774	1.82571e-19
RTN4RL1	6.53814e-24	3.92847	1.82571e-19
C1orf186	6.53554e-24	3.85063	1.82498e-19
NAP1L6	6.53001e-17	1.03188	1.82344e-12
RP11-299H21.1	6.52775e-24	3.80795	1.82281e-19
SPNS3	6.52542e-13	-1.24721	1.82216e-08
IGSF9	6.52475e-64	5.36495	1.82197e-59
PITPNC1	6.52184e-65	-2.76871	1.82116e-60
TMEM59L	6.51738e-46	4.10289	1.81991e-41
TLR5	6.51732e-93	4.28761	1.8199e-88
LRP12	6.51682e-115	1.18411	1.81976e-110
IKZF2	6.5158e-32	-1.55038	1.81947e-27
KRAS	6.51155e-278	1.4153	1.81829e-273
CLDN8	6.50854e-34	3.46118	1.81744e-29
ZBTB32	6.50271e-07	1.09155	0.0181582
IQGAP3	6.50033e-07	1.21605	0.0181515
SYNPO	6.49644e-259	4.23575	1.81407e-254
RP3-522J7.6	6.49204e-23	2.91213	1.81284e-18
BMP2K	6.48552e-212	1.73724	1.81102e-207
ORAI1	6.48356e-18	-2.24932	1.81047e-13
THEMIS2	6.48017e-45	-2.56445	1.80952e-40
TMEM241	6.46726e-125	1.34543	1.80592e-120
CCNT2-AS1	6.46527e-09	1.27484	0.000180536
AC079807.2	6.46474e-07	-1.09562	0.0180521
FSCN1	6.46403e-72	1.51382	1.80502e-67
FAM78A	6.4603e-98	-3.50564	1.80397e-93
BTBD3	6.45944e-93	4.27943	1.80373e-88
XPNPEP1	6.45906e-45	-1.00776	1.80363e-40
RP11-379B8.1	6.45695e-43	5.44559	1.80304e-38
RP6-65G23.3	6.45669e-89	2.03951	1.80297e-84
PTPN22	6.4559e-241	-3.28676	1.80275e-236
AMOTL2	6.45018e-219	4.96102	1.80115e-214
PTBP2	6.43723e-18	-1.42637	1.79753e-13
CAP2	6.4348e-58	3.65786	1.79685e-53
RAP1B	6.43187e-178	-1.23872	1.79604e-173
NEO1	6.43036e-195	1.26053	1.79561e-190
MFI2-AS1	6.43002e-37	1.84886	1.79552e-32
LAPTM5	6.42817e-307	-2.56742	1.795e-302
AQP4	6.42787e-307	5.10463	1.79492e-302
HUNK	6.41709e-55	3.84165	1.79191e-50
ZSWIM5	6.40928e-60	1.77492	1.78973e-55
CLP1	6.40782e-28	-1.10362	1.78932e-23
C20orf196	6.40578e-12	-1.71949	1.78875e-07
FSTL4	6.40558e-39	5.81904	1.78869e-34
RP11-635O16.2	6.40558e-39	5.85364	1.78869e-34
GSDMC	6.40558e-39	5.83751	1.78869e-34
RCAN1	6.40447e-171	1.60963	1.78839e-166
IGHG3	6.40059e-248	3.66085	1.7873e-243
SENP5	6.39957e-45	-1.03957	1.78702e-40
CYP3A5	6.39937e-217	3.35228	1.78696e-212
SIRT6	6.39766e-35	-1.12614	1.78648e-30
MECR	6.39696e-145	1.10782	1.78629e-140
MEST	6.39599e-246	6.01656	1.78601e-241
FHL3	6.39166e-07	-1.80268	0.0178481
FAM167A	6.39106e-24	1.67762	1.78464e-19
FBLL1	6.38844e-19	3.65062	1.78391e-14
ZNF345	6.38566e-07	-1.38216	0.0178313
MLLT4-AS1	6.38454e-41	3.89809	1.78282e-36
RP5-1125N11.2	6.37992e-13	3.93641	1.78153e-08
ST6GALNAC5	6.37992e-13	4.45142	1.78153e-08
RP11-387A1.5	6.37992e-13	4.4554	1.78153e-08
COX7B2	6.37992e-13	4.50452	1.78153e-08
LINC00964	6.37992e-13	4.58138	1.78153e-08
RP11-69C13.1	6.37992e-13	4.41034	1.78153e-08
DNMT3B	6.37992e-13	4.75856	1.78153e-08
ARL4D	6.37979e-26	-1.67593	1.78149e-21
SEC14L4	6.37757e-07	2.38056	0.0178087
LINC00944	6.37737e-52	-3.74531	1.78082e-47
PTK6	6.37351e-275	5.25813	1.77974e-270
BPIFA2	6.37151e-22	5.44567	1.77918e-17
SEMA3B-AS1	6.37151e-22	5.06971	1.77918e-17
RP11-141B14.1	6.37135e-15	-1.19641	1.77914e-10
STBD1	6.36754e-16	3.04422	1.77807e-11
ITGB1BP2	6.36327e-19	4.37629	1.77688e-14
ARHGAP31	6.3625e-192	2.16342	1.77666e-187
MAT2B	6.36207e-17	-1.10453	1.77654e-12
SLC11A2	6.35831e-278	1.29564	1.77549e-273
SYCP2	6.35676e-08	-1.51747	0.00177506
SCIN	6.35594e-293	5.03493	1.77483e-288
MSC	6.35529e-07	-3.31369	0.0177465
SLC9A5	6.35499e-24	1.9837	1.77457e-19
SLCO4A1	6.35122e-16	1.47224	1.77351e-11
CETN3	6.3408e-236	1.07137	1.77061e-231
ZNF839	6.34068e-128	1.16032	1.77057e-123
PRKACB	6.33896e-93	-2.79573	1.77009e-88
SLC25A23	6.3378e-272	1.84512	1.76977e-267
PHLPP2	6.3372e-07	-1.60948	0.017696
CAPZA1	6.33703e-61	-1.79343	1.76955e-56
CENPE	6.33609e-07	-1.11371	0.0176929
PPP3R1	6.33379e-27	-1.29552	1.76865e-22
BACE1	6.33368e-165	3.58856	1.76862e-160
NAT14	6.33285e-176	1.75422	1.76839e-171
RP11-894P9.1	6.33143e-14	-1.22152	1.76799e-09
AP000476.1	6.32538e-34	-4.35525	1.7663e-29
FAM76B	6.32513e-34	-1.062	1.76623e-29
MAP1B	6.32286e-127	3.97861	1.7656e-122
ADD2	6.32267e-09	2.59232	0.000176554
C1QTNF1	6.32267e-09	2.17863	0.000176554
RP5-965G21.6	6.32267e-09	1.62343	0.000176554
LINC00638	6.32163e-14	1.69467	1.76525e-09
RP11-548P2.2	6.32023e-09	2.05757	0.000176486
BANCR	6.32023e-09	2.43374	0.000176486
DNAJC6	6.3169e-14	1.93442	1.76393e-09
SNN	6.31665e-202	2.3529	1.76386e-197
TTLL12	6.31496e-141	1.19058	1.76339e-136
WDR82	6.31333e-10	-1.11564	1.76293e-05
CD38	6.31017e-35	-2.86395	1.76205e-30
AC104655.3	6.30966e-08	-3.05489	0.00176191
DCST2	6.3051e-14	2.09665	1.76064e-09
CCDC106	6.30066e-177	2.95392	1.7594e-172
COL17A1	6.30029e-36	3.36485	1.75929e-31
PALD1	6.29867e-17	2.93483	1.75884e-12
CERS5	6.29498e-32	-1.13649	1.75781e-27
AZIN1-AS1	6.29447e-143	1.99612	1.75767e-138
TOPBP1	6.28196e-12	-1.52142	1.75418e-07
ADHFE1	6.28058e-15	-1.33563	1.75379e-10
BTN3A1	6.27589e-62	-2.34744	1.75248e-57
CD46	6.26619e-276	1.14741	1.74977e-271
PTGES	6.26486e-42	6.10903	1.7494e-37
MTFP1	6.26475e-16	-1.69211	1.74937e-11
TMEM108	6.26467e-101	7.40632	1.74935e-96
MCOLN2	6.25966e-14	-3.07846	1.74795e-09
MICALCL	6.25679e-133	6.5659	1.74715e-128
AKAP5	6.25478e-31	-2.85741	1.74658e-26
NDRG2	6.25444e-98	1.43546	1.74649e-93
OPTN	6.25441e-32	-1.8551	1.74648e-27
TP63	6.25288e-46	6.38023	1.74606e-41
PQLC2L	6.25288e-46	6.05712	1.74606e-41
VAV1	6.25249e-08	-2.49948	0.00174595
NLRC3	6.2515e-108	-3.27468	1.74567e-103
EXOSC9	6.24931e-23	-1.31081	1.74506e-18
B4GALNT3	6.24882e-201	2.66181	1.74492e-196
SLC35A2	6.24522e-261	1.33205	1.74392e-256
SPATA6	6.24442e-192	3.30498	1.74369e-187
EMP1	6.24417e-195	1.90421	1.74362e-190
BCKDK	6.23667e-271	1.38443	1.74153e-266
GPR183	6.23323e-149	1.42752	1.74057e-144
SMURF2	6.23316e-282	1.1627	1.74055e-277
NPHP1	6.2287e-108	2.58688	1.7393e-103
TTC9	6.22773e-176	2.75572	1.73903e-171
RP11-467L13.7	6.22399e-231	1.33113	1.73799e-226
C4orf19	6.22396e-141	5.24666	1.73798e-136
ZHX2	6.22293e-33	-1.04029	1.73769e-28
BCAT2	6.22171e-202	1.06197	1.73735e-197
CWF19L1	6.22097e-21	-1.11003	1.73714e-16
TPST2	6.21937e-198	-3.08298	1.7367e-193
CTD-2292P10.4	6.21937e-22	2.71935	1.7367e-17
FKBP11	6.21848e-22	-1.95512	1.73645e-17
CEACAM8	6.21444e-22	3.89235	1.73532e-17
SP110	6.21308e-17	-1.54498	1.73494e-12
PPARG	6.20918e-111	1.13512	1.73385e-106
RP11-554J4.1	6.20634e-11	-1.14925	1.73306e-06
XRCC6BP1	6.20615e-301	2.1642	1.73301e-296
PTPRE	6.20261e-11	-1.35356	1.73202e-06
AC142472.6	6.19989e-18	-1.04302	1.73126e-13
KIF21A	6.19927e-38	-1.02594	1.73109e-33
KMO	6.19629e-12	1.33603	1.73025e-07
RP11-156K13.1	6.19337e-66	4.10646	1.72944e-61
HSPBAP1	6.19306e-07	-1.66036	0.0172935
TSHZ1	6.18646e-34	-1.31086	1.72751e-29
FRY	6.16882e-238	1.477	1.72258e-233
ASAP2	6.1672e-233	4.9055	1.72213e-228
WDR86	6.16716e-107	3.75888	1.72212e-102
WNT3A	6.16601e-13	2.58811	1.7218e-08
INTU	6.16461e-132	3.47601	1.72141e-127
RPTOR	6.16207e-35	-1.09812	1.7207e-30
TRIP10	6.16037e-166	1.97558	1.72022e-161
KIAA1462	6.15739e-71	3.43458	1.71939e-66
C15orf62	6.15573e-12	1.74102	1.71893e-07
MIPOL1	6.15424e-148	5.67139	1.71851e-143
MGAT4A	6.1532e-45	-2.37555	1.71822e-40
TDO2	6.153e-29	5.30469	1.71816e-24
RP11-131N11.4	6.153e-29	5.6242	1.71816e-24
TCEAL7	6.15151e-32	5.44295	1.71775e-27
MAN2B2	6.15112e-30	-1.04799	1.71764e-25
TFPI2	6.15097e-35	2.71799	1.7176e-30
PPP1R1C	6.15078e-108	6.93817	1.71754e-103
TCTEX1D4	6.1484e-29	2.10603	1.71688e-24
LYPD6B	6.14639e-12	2.00566	1.71632e-07
RP11-10A14.4	6.14639e-12	2.0998	1.71632e-07
SEPSECS-AS1	6.14502e-15	-1.19434	1.71594e-10
EFR3B	6.1417e-54	3.09124	1.71501e-49
OSR1	6.14117e-42	3.68661	1.71486e-37
LXN	6.13649e-34	-1.10414	1.71355e-29
ITM2A	6.12804e-55	-2.35512	1.71119e-50
RHOXF1-AS1	6.12705e-113	4.9909	1.71092e-108
AC016995.3	6.12518e-10	3.97679	1.7104e-05
RP11-440D17.4	6.12518e-10	3.71586	1.7104e-05
COL2A1	6.12518e-10	4.06043	1.7104e-05
RIMS4	6.12518e-10	3.77161	1.7104e-05
LINC01572	6.12518e-10	4.0889	1.7104e-05
NCOA1	6.12435e-13	-1.30858	1.71016e-08
TTC32	6.12374e-15	-1.39625	1.70999e-10
STXBP5	6.11824e-29	-1.21334	1.70846e-24
CBY1	6.11666e-278	2.46716	1.70802e-273
THBD	6.11583e-146	1.8233	1.70778e-141
AF064858.6	6.11471e-67	6.98801	1.70747e-62
SLC15A4	6.11148e-91	-2.85307	1.70657e-86
RNF125	6.11088e-177	-3.41819	1.7064e-172
ZBTB11	6.10434e-24	-1.15553	1.70458e-19
EEPD1	6.10116e-29	3.00432	1.70369e-24
DPP10	6.08901e-77	7.04861	1.7003e-72
RGN	6.08901e-77	7.18308	1.7003e-72
ZBTB47	6.08889e-31	2.36818	1.70026e-26
TMEM100	6.08888e-08	2.30376	0.00170026
LINC01508	6.08877e-31	5.73502	1.70023e-26
PC	6.08824e-136	3.55876	1.70008e-131
KCND3	6.08386e-48	2.28093	1.69886e-43
KIR2DL3	6.08368e-109	-4.59478	1.69881e-104
C6orf222	6.08366e-21	1.96612	1.6988e-16
RASA2	6.0798e-34	-2.19895	1.69772e-29
TINF2	6.07728e-14	-1.37198	1.69702e-09
SUPV3L1	6.07539e-33	-1.11998	1.69649e-28
NECAP1	6.07148e-20	-1.32915	1.6954e-15
EGLN3	6.0666e-58	5.074	1.69404e-53
TRIM8	6.06109e-284	1.00824	1.6925e-279
GK5	6.05632e-41	-2.25895	1.69117e-36
GOLPH3L	6.05486e-244	1.18337	1.69076e-239
IQSEC1	6.05237e-10	-1.65836	1.69006e-05
CTC-534A2.2	6.04965e-10	-1.52979	1.6893e-05
MTMR6	6.04682e-27	-1.37053	1.68851e-22
USP44	6.04171e-121	1.68342	1.68709e-116
TFAP2A	6.04167e-119	6.1294	1.68708e-114
GPR171	6.03889e-48	-2.99692	1.6863e-43
ZNF624	6.03744e-16	-1.24428	1.6859e-11
CBLC	6.0365e-56	3.58891	1.68563e-51
RP4-710M16.2	6.02926e-49	3.50205	1.68361e-44
KLRC4	6.02844e-147	-3.61221	1.68338e-142
NTNG2	6.02791e-41	-3.29612	1.68323e-36
SPTBN2	6.02711e-136	6.30046	1.68301e-131
RNF166	6.02575e-147	-2.73531	1.68263e-142
DENND4A	6.02469e-37	-1.13812	1.68233e-32
RP11-801F7.1	6.02382e-17	4.84566	1.68209e-12
RHPN1-AS1	6.02382e-17	4.58456	1.68209e-12
SMIM12	6.01889e-22	-1.37274	1.68071e-17
CTD-2616J11.2	6.01847e-14	-3.85359	1.6806e-09
RP6-201G10.2	6.01722e-29	3.96023	1.68025e-24
MAPK12	6.01526e-73	1.71037	1.6797e-68
PPP1R16B	6.0065e-60	-3.37018	1.67725e-55
CHMP1A	6.00614e-46	-1.02017	1.67715e-41
AP1S3	6.00298e-169	1.62859	1.67627e-164
TRPM2-AS	6.00122e-69	6.51571	1.67578e-64
TNRC6C	5.99763e-31	-1.13066	1.67478e-26
RP5-862P8.2	5.99653e-137	4.6572	1.67447e-132
ARHGAP24	5.99421e-260	4.99278	1.67382e-255
POU2F3	5.99283e-122	7.89193	1.67344e-117
ECE2	5.99208e-91	1.02538	1.67323e-86
FAM71A	5.99125e-53	5.19009	1.673e-48
UBA1	5.98572e-297	1.20725	1.67145e-292
MAPK6	5.98513e-238	1.06574	1.67129e-233
TMEM198	5.98141e-42	1.95727	1.67025e-37
HAUS1	5.97905e-07	-1.93299	0.0166959
ASH2L	5.97715e-39	-1.08312	1.66906e-34
SHE	5.97564e-216	6.40104	1.66864e-211
LEXM	5.97449e-12	-2.6974	1.66832e-07
MREG	5.9728e-196	2.43562	1.66784e-191
PCDH18	5.97122e-20	4.76004	1.6674e-15
IGFBPL1	5.97122e-20	4.69481	1.6674e-15
BARX1	5.97122e-20	4.69797	1.6674e-15
ZG16B	5.97122e-20	4.84502	1.6674e-15
CCL20	5.97063e-81	1.46784	1.66724e-76
GUCY1A3	5.96773e-227	4.24218	1.66643e-222
CLDND1	5.96625e-39	-1.06222	1.66602e-34
PAPD4	5.96482e-20	-1.20116	1.66562e-15
RP11-328K4.1	5.95731e-07	3.22036	0.0166352
RP11-279O9.4	5.95731e-07	2.79573	0.0166352
GABRG2	5.95731e-07	2.54853	0.0166352
COL10A1	5.95731e-07	3.98666	0.0166352
KIF4A	5.95731e-07	3.38165	0.0166352
RP11-794G24.1	5.95731e-07	3.69223	0.0166352
RCOR2	5.95731e-07	3.0335	0.0166352
RP11-805J14.5	5.95731e-07	2.8142	0.0166352
RP1-63M2.7	5.95731e-07	2.96215	0.0166352
MED4	5.95595e-12	-1.22644	1.66314e-07
UNG	5.95593e-22	-1.46867	1.66313e-17
CARD6	5.95281e-64	1.28409	1.66226e-59
EPHA4	5.9525e-307	3.5233	1.66218e-302
MRAS	5.95086e-69	2.80014	1.66172e-64
TBC1D25	5.9504e-44	-1.00779	1.66159e-39
CDR2L	5.94952e-75	6.71939	1.66134e-70
SPHK1	5.94936e-08	-1.33751	0.0016613
KCNN4	5.94838e-122	3.04645	1.66103e-117
ZBED2	5.94737e-23	2.32855	1.66074e-18
IGHG2	5.94508e-17	2.16137	1.6601e-12
MAP4K3	5.93615e-231	1.92577	1.65761e-226
ZFHX2	5.93492e-25	1.47555	1.65727e-20
KLF15	5.93468e-73	5.58281	1.6572e-68
ERBB4	5.93395e-37	2.87647	1.65699e-32
TRPC3	5.93368e-10	-4.21409	1.65692e-05
SLC39A9	5.93177e-255	1.01182	1.65639e-250
KIAA1549	5.93169e-93	3.31427	1.65636e-88
ALPL	5.92933e-183	4.26547	1.6557e-178
NEFM	5.92893e-10	1.10734	1.65559e-05
C1orf115	5.9271e-190	5.07113	1.65508e-185
KCNK12	5.92654e-10	-2.82593	1.65493e-05
NKX2-8	5.92641e-57	3.4758	1.65489e-52
TMEM44	5.9243e-101	2.17178	1.6543e-96
RAD52	5.92375e-09	-1.17583	0.000165415
SENP8	5.9236e-44	2.05965	1.65411e-39
VIPR1	5.92298e-154	4.11604	1.65393e-149
C1QTNF9B-AS1	5.91513e-19	1.57141	1.65174e-14
ADRB1	5.9146e-156	2.25445	1.65159e-151
FAH	5.91428e-298	1.84494	1.6515e-293
C1orf112	5.91116e-09	-1.12263	0.000165063
ITPR1	5.91106e-29	-1.07915	1.6506e-24
FBXO15	5.90862e-25	1.48413	1.64992e-20
RP1-163G9.2	5.90812e-14	4.28761	1.64978e-09
CD1A	5.90812e-14	5.05193	1.64978e-09
RP11-201E8.1	5.90812e-14	4.66831	1.64978e-09
SPINK9	5.90812e-14	4.07629	1.64978e-09
RP11-775D22.2	5.90812e-14	4.5385	1.64978e-09
RP11-399K21.14	5.90812e-14	4.69853	1.64978e-09
RP11-221N13.3	5.90812e-14	4.59956	1.64978e-09
MANBAL	5.90555e-293	1.56113	1.64907e-288
AEBP2	5.90546e-305	1.54164	1.64904e-300
CC2D2A	5.90414e-120	3.27229	1.64867e-115
IL10RA	5.89659e-152	-2.97424	1.64656e-147
BMPR1A	5.89654e-141	1.07047	1.64655e-136
FILIP1L	5.89371e-231	5.50426	1.64576e-226
SPAG8	5.8923e-07	-1.33769	0.0164537
C1QL1	5.88962e-13	1.49506	1.64462e-08
PIK3R1	5.88734e-16	-1.79625	1.64398e-11
SCAMP5	5.88696e-40	3.70319	1.64387e-35
AHRR	5.88555e-10	2.15428	1.64348e-05
ANXA5	5.87609e-263	1.06296	1.64084e-258
RP11-429E11.3	5.87491e-12	-3.63738	1.64051e-07
KCNN3	5.8737e-19	1.6273	1.64017e-14
ANXA6	5.87267e-101	-2.27291	1.63989e-96
ERMP1	5.87255e-21	-1.27795	1.63985e-16
RP11-352D13.6	5.85222e-17	3.62526	1.63417e-12
ITGA7	5.84847e-23	1.00282	1.63313e-18
ZNF484	5.84523e-08	-1.32668	0.00163222
CD96	5.84032e-46	-2.25722	1.63085e-41
FAM131A	5.83873e-125	1.10889	1.63041e-120
PRAME	5.83209e-38	6.0562	1.62855e-33
CTD-2619J13.17	5.82645e-11	1.28916	1.62698e-06
GTF2I	5.82481e-286	1.19622	1.62652e-281
DCAF17	5.81585e-24	-1.2835	1.62402e-19
P2RY13	5.81455e-17	1.97079	1.62366e-12
CCT2	5.81277e-258	1.31514	1.62316e-253
PRR5L	5.81275e-203	-3.6341	1.62315e-198
CTD-2308L22.1	5.81265e-20	3.52754	1.62312e-15
MPHOSPH8	5.81157e-16	-1.07558	1.62282e-11
AC073283.4	5.80102e-88	4.05042	1.61988e-83
IL2RA	5.79944e-26	1.13952	1.61944e-21
SMIM13	5.79618e-37	-1.15066	1.61853e-32
TSEN54	5.79598e-10	-2.1535	1.61847e-05
RP4-728D4.2	5.79539e-24	-3.32834	1.61831e-19
AC144652.1	5.79428e-09	-1.44235	0.0001618
B3GALNT2	5.79189e-189	1.57194	1.61733e-184
CETN2	5.79088e-298	1.47763	1.61705e-293
RP11-16E12.2	5.79061e-50	6.80985	1.61697e-45
ZNF772	5.78741e-44	1.53717	1.61608e-39
LY75	5.78519e-40	-1.03154	1.61546e-35
ADO	5.77487e-18	-1.5582	1.61257e-13
CTD-2369P2.10	5.77458e-35	1.43454	1.61249e-30
CDK14	5.77091e-109	4.71455	1.61147e-104
CR2	5.77028e-64	7.01612	1.61129e-59
CYP4F35P	5.76929e-07	-2.90812	0.0161102
PHGDH	5.7668e-61	1.06446	1.61032e-56
C17orf96	5.76672e-75	1.41242	1.6103e-70
ENO3	5.76533e-83	1.11628	1.60991e-78
ADCY3	5.76376e-44	1.04603	1.60947e-39
ARMCX3	5.76029e-276	1.01391	1.6085e-271
FZD8	5.75941e-137	2.97912	1.60826e-132
CCDC125	5.75125e-230	1.42598	1.60598e-225
KIAA1683	5.74887e-63	1.57108	1.60531e-58
CEL	5.74667e-13	1.60613	1.6047e-08
ZNF487	5.74601e-23	-1.26874	1.60452e-18
NOVA1	5.74531e-279	5.22131	1.60432e-274
ARHGEF38	5.73978e-263	6.45904	1.60278e-258
SH2D2A	5.73636e-187	-3.40183	1.60182e-182
EFEMP2	5.7361e-244	2.67829	1.60175e-239
DOCK2	5.73292e-102	-3.30097	1.60086e-97
CLTCL1	5.7329e-27	2.99002	1.60086e-22
KLHL9	5.7322e-40	-1.15365	1.60066e-35
GOLIM4	5.72834e-305	1.02621	1.59958e-300
LINC00115	5.72631e-17	-1.12449	1.59902e-12
SSPO	5.72622e-14	2.3537	1.59899e-09
KBTBD11	5.72436e-51	2.52257	1.59847e-46
SLC25A48	5.72328e-23	5.07207	1.59817e-18
CCDC17	5.7192e-08	-1.37758	0.00159703
LINC01184	5.71919e-273	1.3558	1.59703e-268
CIB2	5.71757e-52	1.58567	1.59657e-47
SFT2D2	5.71287e-11	-1.19156	1.59526e-06
ZNF135	5.70565e-39	1.97087	1.59325e-34
ACO1	5.70219e-215	1.03664	1.59228e-210
RP11-677M14.3	5.70157e-97	2.9587	1.59211e-92
PAIP2B	5.69786e-118	1.53541	1.59107e-113
GTF3A	5.68981e-56	-1.75436	1.58882e-51
RP11-138J23.1	5.68781e-11	4.24293	1.58826e-06
CTD-3064M3.4	5.68781e-11	4.37232	1.58826e-06
RPGRIP1	5.68781e-11	4.04552	1.58826e-06
RP11-108K3.1	5.68781e-11	4.10492	1.58826e-06
MYZAP	5.68781e-11	3.75828	1.58826e-06
FLJ42969	5.68781e-11	4.11223	1.58826e-06
NUDT8	5.68411e-257	1.71262	1.58723e-252
C11orf65	5.68261e-54	1.2216	1.58681e-49
ZNF790	5.68093e-09	-1.41392	0.000158634
ABCA12	5.67839e-81	7.25044	1.58563e-76
RPIA	5.67802e-39	-1.15381	1.58553e-34
ZNRD1	5.67139e-13	-1.27086	1.58368e-08
RP3-477O4.14	5.66898e-44	-3.16316	1.58301e-39
SEMA3B	5.66865e-250	4.32825	1.58291e-245
PLXDC1	5.66783e-115	2.42512	1.58268e-110
GALNT18	5.66682e-203	3.99419	1.5824e-198
AC137932.5	5.66622e-17	1.98954	1.58223e-12
APAF1	5.66615e-15	-1.45754	1.58221e-10
NFKBIB	5.66179e-19	-1.36637	1.581e-14
DGKG	5.65967e-50	5.22039	1.58041e-45
RPL17	5.65926e-217	-1.86449	1.58029e-212
PDIK1L	5.65589e-207	1.05353	1.57935e-202
BAIAP3	5.65584e-138	3.38659	1.57934e-133
ZNF774	5.65417e-124	3.78898	1.57887e-119
PRR5	5.65343e-08	-2.41987	0.00157866
C5orf56	5.64873e-162	-2.7827	1.57735e-157
FKBP7	5.64703e-151	2.6912	1.57688e-146
SMIM10L2A	5.64515e-121	5.31029	1.57635e-116
TMEM240	5.64496e-07	1.76245	0.015763
LDHD	5.64469e-101	4.58792	1.57622e-96
TAC4	5.64279e-07	2.21599	0.0157569
CEP126	5.64081e-17	-1.41238	1.57514e-12
NOTUM	5.63947e-26	3.41892	1.57477e-21
SHB	5.6378e-247	2.41572	1.5743e-242
ACE2	5.63263e-168	7.67767	1.57286e-163
CNKSR3	5.63117e-185	4.96396	1.57245e-180
A2M-AS1	5.63024e-23	-3.64692	1.57219e-18
NEK11	5.6296e-75	2.19995	1.57201e-70
ACSF2	5.62905e-208	1.85362	1.57186e-203
RP11-408O19.5	5.62309e-19	2.46279	1.57019e-14
RAB40B	5.62062e-277	2.27242	1.5695e-272
MTF2	5.6198e-15	-1.2571	1.56927e-10
ACTR3C	5.61967e-166	1.43554	1.56924e-161
RP3-460G2.2	5.61666e-19	2.37437	1.5684e-14
ZNF480	5.61533e-30	-1.1898	1.56802e-25
CTPS2	5.61334e-198	3.02772	1.56747e-193
PRIMPOL	5.61316e-31	-1.01123	1.56742e-26
NAT9	5.61055e-276	1.22393	1.56669e-271
HSH2D	5.60559e-48	-2.84875	1.56531e-43
TBC1D8	5.60324e-125	5.54121	1.56465e-120
STS	5.60213e-100	1.97723	1.56434e-95
SMARCD3	5.59962e-260	3.54483	1.56364e-255
CT83	5.59788e-120	8.05688	1.56315e-115
RP11-872J21.3	5.59549e-47	1.14714	1.56248e-42
SLFN11	5.5947e-15	-1.37596	1.56226e-10
FGF11	5.59454e-31	1.80886	1.56222e-26
PIK3CG	5.59368e-65	-3.21361	1.56198e-60
NHSL2	5.59004e-18	-1.40035	1.56096e-13
NAALADL2	5.58793e-278	4.56015	1.56037e-273
PIGK	5.58631e-38	-1.14955	1.55992e-33
BNIPL	5.58607e-53	1.41396	1.55985e-48
FCER1A	5.58294e-16	1.1475	1.55898e-11
CLCNKB	5.57927e-25	1.71803	1.55796e-20
CA8	5.57489e-25	3.08512	1.55673e-20
DNAJC12	5.5717e-127	4.01813	1.55584e-122
IQSEC2	5.56939e-185	2.95874	1.5552e-180
KLRC4-KLRK1	5.56791e-15	-3.88288	1.55478e-10
SLC6A14	5.56537e-210	2.73039	1.55407e-205
GM2A	5.56488e-239	1.52142	1.55394e-234
TRGV10	5.56368e-11	-3.31821	1.5536e-06
KRTAP5-10	5.55661e-07	3.29024	0.0155163
ARHGAP39	5.55549e-87	3.3013	1.55132e-82
HIPK1-AS1	5.5541e-07	-1.24413	0.0155093
TMEM170B	5.54854e-74	1.39348	1.54937e-69
ZMYND8	5.54499e-295	1.01746	1.54838e-290
NCBP1	5.54476e-32	-1.28445	1.54832e-27
N4BP3	5.54179e-63	2.9984	1.54749e-58
JAKMIP2	5.54166e-99	-3.75123	1.54745e-94
PCDHB11	5.54019e-49	6.09376	1.54704e-44
HEBP1	5.53948e-258	1.62102	1.54684e-253
RP11-798M19.6	5.53926e-17	-1.09521	1.54678e-12
RP11-392P7.6	5.53023e-42	1.53424	1.54426e-37
CEBPD	5.52951e-275	1.16428	1.54406e-270
PADI2	5.52863e-17	1.71947	1.54381e-12
RIPK4	5.52149e-207	4.98186	1.54182e-202
PKP1	5.51919e-14	4.45094	1.54118e-09
CCDC53	5.51812e-45	-1.06319	1.54088e-40
MCCC1	5.51809e-231	1.09798	1.54087e-226
ZNF384	5.5179e-15	-1.52491	1.54082e-10
NPTX2	5.51597e-18	5.19843	1.54028e-13
REP15	5.51597e-18	4.47442	1.54028e-13
C11orf16	5.51532e-25	1.64947	1.5401e-20
HBG2	5.51487e-252	2.44557	1.53997e-247
BCYRN1	5.50134e-218	3.95089	1.53619e-213
KRT80	5.49716e-179	4.6631	1.53503e-174
IRAK3	5.49453e-72	2.25116	1.53429e-67
ELANE	5.49419e-44	6.75759	1.5342e-39
CD40	5.4862e-302	1.9045	1.53197e-297
PPP1R12A	5.48548e-69	-1.90752	1.53176e-64
SNTB2	5.48412e-27	-1.23331	1.53139e-22
C4orf46	5.48323e-13	-1.41839	1.53114e-08
RP11-60L3.1	5.48201e-16	1.98715	1.5308e-11
RP11-285F7.2	5.482e-159	1.63611	1.53079e-154
KLHDC8A	5.4809e-08	3.77021	0.00153049
PCDHA5	5.4809e-08	3.60525	0.00153049
CCL26	5.4809e-08	5.26152	0.00153049
BLK	5.4809e-08	3.79195	0.00153049
RP11-390F4.6	5.4809e-08	3.82599	0.00153049
LRRC55	5.4809e-08	4.06617	0.00153049
B4GALNT1	5.4809e-08	3.28652	0.00153049
PLIN1	5.4809e-08	4.10194	0.00153049
RP11-77H9.8	5.4809e-08	3.25956	0.00153049
CLEC19A	5.4809e-08	3.66162	0.00153049
VPS9D1-AS1	5.4809e-08	3.29977	0.00153049
CTD-2006K23.2	5.4809e-08	3.75807	0.00153049
RTBDN	5.4809e-08	3.66809	0.00153049
CTB-102L5.4	5.4809e-08	2.9744	0.00153049
RBM42	5.47356e-45	-1.08919	1.52844e-40
FXYD5	5.47287e-27	-1.44224	1.52825e-22
CDKL5	5.47201e-219	2.56393	1.52801e-214
RP11-477N3.1	5.46628e-09	-1.11599	0.00015264
RP11-2C24.7	5.46344e-07	1.16936	0.0152561
ZNF138	5.45965e-35	-1.2323	1.52455e-30
CTC-321K16.1	5.45862e-15	4.68252	1.52426e-10
POU5F1	5.45862e-15	4.68616	1.52426e-10
CST1	5.45862e-15	6.57719	1.52426e-10
RP11-441O15.3	5.45855e-08	-1.02068	0.00152425
PLEKHA7	5.44888e-123	5.22063	1.52155e-118
RSRC1	5.44609e-33	-1.10695	1.52077e-28
EMILIN1	5.44379e-11	1.18566	1.52012e-06
SLC35F5	5.44047e-262	1.05118	1.5192e-257
USP28	5.43989e-08	-2.04564	0.00151903
ZBTB14	5.43519e-15	-1.55255	1.51772e-10
TMEM136	5.43341e-100	5.8774	1.51723e-95
RP11-1055B8.4	5.4309e-68	5.30093	1.51652e-63
TEPP	5.43045e-251	4.10784	1.5164e-246
PRKRA	5.42869e-263	1.05746	1.51591e-258
RP11-563J2.3	5.42708e-09	1.21802	0.000151546
ZNF273	5.42056e-15	-1.36871	1.51364e-10
AHNAK	5.41407e-271	-1.74025	1.51183e-266
TRIM71	5.40716e-21	5.40782	1.50989e-16
CD69	5.40428e-72	-2.12895	1.50909e-67
LINC00982	5.40404e-175	6.88087	1.50902e-170
AJUBA	5.39559e-98	4.61767	1.50667e-93
GID4	5.39498e-36	-1.05947	1.50649e-31
GPM6A	5.39468e-50	2.96306	1.50641e-45
PDLIM2	5.3946e-12	-1.79678	1.50639e-07
B3GALNT1	5.3913e-31	1.75817	1.50547e-26
VANGL2	5.38639e-90	4.0211	1.5041e-85
SP140	5.37964e-33	-2.48	1.50221e-28
TGFA	5.37795e-150	2.31361	1.50174e-145
GPC6	5.37737e-119	7.76857	1.50158e-114
PROS1	5.37647e-197	3.13898	1.50133e-192
RP11-126K1.6	5.37482e-36	1.00863	1.50086e-31
AK8	5.37462e-10	1.91047	1.50081e-05
RGS19	5.37199e-13	-2.18665	1.50008e-08
CNGA1	5.36886e-70	7.31084	1.4992e-65
MRPS33	5.36804e-270	1.06346	1.49897e-265
CTD-2005H7.1	5.36803e-18	3.04707	1.49897e-13
LGR6	5.36566e-28	-3.25192	1.49831e-23
AK9	5.36307e-40	-1.03403	1.49758e-35
DPH7	5.36217e-30	-1.05067	1.49733e-25
ZNF697	5.36077e-16	1.28695	1.49694e-11
RTN2	5.35859e-147	3.77197	1.49633e-142
MAD1L1	5.35069e-23	-1.35802	1.49413e-18
CYBB	5.35003e-96	1.17643	1.49394e-91
MAMDC2-AS1	5.34971e-14	2.4476	1.49385e-09
PTHLH	5.34683e-71	7.01453	1.49305e-66
VCAN	5.34299e-217	3.91229	1.49198e-212
TGFBR3	5.34085e-142	-3.15694	1.49138e-137
CTB-113D17.1	5.33745e-14	3.11362	1.49043e-09
VWA5A	5.33581e-252	2.17552	1.48997e-247
CTF1	5.33443e-244	3.01664	1.48959e-239
KCNMB4	5.33304e-28	1.17032	1.4892e-23
NEURL1B	5.33209e-90	3.97261	1.48893e-85
C14orf79	5.33131e-81	2.28362	1.48872e-76
PIM1	5.33068e-77	-2.292	1.48854e-72
TCTEX1D2	5.32928e-12	-1.52813	1.48815e-07
SPRTN	5.32875e-30	-1.11691	1.488e-25
CD79A	5.3271e-43	2.74856	1.48754e-38
DNAJC9	5.32664e-43	-1.06675	1.48741e-38
RP13-401N8.1	5.3184e-33	2.3475	1.48511e-28
VCPKMT	5.31711e-30	-1.2278	1.48475e-25
BUB1	5.31466e-26	1.07088	1.48406e-21
ATP7B	5.31298e-11	3.6827	1.4836e-06
APBB2	5.31065e-136	3.68164	1.48295e-131
SMU1	5.30913e-25	-1.30186	1.48252e-20
FUT6	5.30861e-22	1.09036	1.48238e-17
GPT	5.30483e-38	5.60739	1.48132e-33
S100P	5.30419e-68	1.22939	1.48114e-63
C2CD4A	5.30175e-66	4.23947	1.48046e-61
TTLL11	5.3016e-08	-1.3203	0.00148042
AL049794.1	5.30151e-35	4.25959	1.48039e-30
CD8A	5.29888e-87	-3.42967	1.47966e-82
RP11-210M15.2	5.298e-15	1.05072	1.47941e-10
KRT13	5.29583e-66	3.4495	1.47881e-61
C1orf168	5.2944e-62	3.0111	1.47841e-57
STAT4	5.2934e-137	-3.08965	1.47813e-132
UBAP1L	5.29002e-43	1.03662	1.47719e-38
CHST12	5.28753e-139	-2.29957	1.47649e-134
C10orf10	5.2858e-206	3.93913	1.47601e-201
FAIM2	5.28569e-26	5.86176	1.47598e-21
RP11-542B15.1	5.28569e-26	5.42782	1.47598e-21
RP4-697K14.15	5.28569e-26	5.46452	1.47598e-21
TPRG1	5.28182e-10	-1.53829	1.4749e-05
KCNIP2	5.2811e-12	4.39919	1.47469e-07
KCNJ12	5.2811e-12	4.04901	1.47469e-07
HOXB5	5.2811e-12	3.95975	1.47469e-07
SRP14-AS1	5.28062e-91	1.4251	1.47456e-86
DAPK2	5.27901e-271	1.29154	1.47411e-266
KLC3	5.27701e-48	6.36374	1.47355e-43
ANKRD65	5.27654e-293	5.31808	1.47342e-288
ADCK1	5.27601e-90	1.3208	1.47327e-85
HSD3B7	5.27251e-145	2.33045	1.4723e-140
GPT2	5.27065e-301	5.85722	1.47178e-296
NYAP2	5.26636e-60	6.94376	1.47058e-55
FUNDC1	5.26179e-293	1.78072	1.4693e-288
RP11-468N14.13	5.26117e-58	6.60635	1.46913e-53
CNNM1	5.26117e-58	6.71273	1.46913e-53
FOXB1	5.26005e-32	2.78714	1.46882e-27
TRIM6	5.25992e-70	4.87268	1.46878e-65
RANBP6	5.25649e-09	-1.65604	0.000146782
ZNF45	5.25426e-08	-1.66744	0.0014672
SMIM10L1	5.25403e-21	-1.27299	1.46713e-16
ARHGAP19	5.25083e-27	-1.07385	1.46624e-22
LIN28B	5.24965e-32	6.07448	1.46591e-27
MMP28	5.24911e-282	4.64195	1.46576e-277
PLIN4	5.24266e-10	1.03066	1.46396e-05
PLAUR	5.24134e-223	1.10206	1.46359e-218
SLC44A2	5.24124e-14	-1.34489	1.46356e-09
CRTAM	5.23609e-59	-3.25094	1.46213e-54
PTPRM	5.23576e-195	1.20422	1.46203e-190
ARNT2	5.23491e-67	4.3486	1.4618e-62
OPLAH	5.23345e-146	4.52019	1.46139e-141
NUDT13	5.23338e-58	1.69872	1.46137e-53
SLC26A5	5.23255e-61	6.99179	1.46114e-56
SLC22A18AS	5.22958e-137	5.30498	1.46031e-132
ABL2	5.22646e-213	1.26962	1.45944e-208
SEMA4F	5.22574e-88	1.09403	1.45924e-83
TDRD6	5.22564e-08	2.30475	0.00145921
ENAM	5.22161e-08	1.87496	0.00145808
RP11-861E21.2	5.21963e-08	1.49866	0.00145753
NELL1	5.21894e-208	8.70946	1.45734e-203
RP11-795F19.1	5.21671e-10	1.54169	1.45671e-05
SLC4A11	5.21671e-10	1.199	1.45671e-05
RP11-757F18.5	5.21149e-68	3.89377	1.45526e-63
EIF4G3	5.21142e-27	-1.08646	1.45524e-22
MTMR11	5.21035e-50	3.09327	1.45494e-45
ALKBH6	5.20878e-21	-1.45799	1.4545e-16
ERP44	5.2076e-27	-1.01302	1.45417e-22
TBC1D4	5.20562e-101	2.05045	1.45362e-96
SNTA1	5.2054e-119	1.53381	1.45355e-114
CTA-384D8.36	5.20026e-46	1.51182	1.45212e-41
VPS8	5.1919e-36	-1.00259	1.44978e-31
FCN1	5.19154e-85	1.79487	1.44969e-80
MOB3B	5.19016e-51	2.47681	1.4493e-46
FMNL1	5.18935e-286	-2.93986	1.44907e-281
ZNF547	5.18876e-22	1.07919	1.44891e-17
ANKRD62	5.18685e-87	7.87964	1.44838e-82
C2CD4B	5.18653e-105	2.73835	1.44829e-100
IMPDH1	5.18647e-37	-1.18173	1.44827e-32
SGCB	5.17921e-105	1.13181	1.44624e-100
CEP135	5.17767e-28	-1.01982	1.44581e-23
PTCHD4	5.17002e-38	4.71529	1.44368e-33
FNDC4	5.16593e-48	4.88128	1.44253e-43
CPB2	5.16306e-55	2.13185	1.44173e-50
VRK1	5.16208e-08	-1.72754	0.00144146
RAC3	5.16196e-141	3.45255	1.44142e-136
TTC30B	5.16059e-79	1.55297	1.44104e-74
INCENP	5.15745e-17	-1.13146	1.44017e-12
PDCL	5.15315e-15	-1.58978	1.43896e-10
KANSL1L	5.15313e-192	1.73031	1.43896e-187
MERTK	5.15272e-139	5.14958	1.43885e-134
BZRAP1	5.14927e-07	-2.2776	0.0143788
TFAP2C	5.14768e-245	5.76428	1.43744e-240
RP11-134G8.7	5.14541e-35	1.12113	1.4368e-30
DUSP8	5.14478e-254	1.60116	1.43663e-249
LRRC41	5.14255e-295	1.0068	1.43601e-290
LATS1	5.13663e-39	-1.06682	1.43435e-34
HOTAIRM1	5.13637e-47	-3.37015	1.43428e-42
PRPF40B	5.13513e-173	1.85535	1.43393e-168
NLGN4Y	5.13403e-58	2.51277	1.43363e-53
IGLC2	5.13313e-222	2.21924	1.43337e-217
ZFAND4	5.12138e-24	-1.0807	1.43009e-19
RP11-305L7.3	5.11969e-26	-4.26725	1.42962e-21
RP11-575F12.3	5.11813e-24	5.17705	1.42919e-19
IGSF1	5.11644e-43	6.17818	1.42872e-38
LINC01270	5.11185e-18	4.46645	1.42743e-13
PEX11G	5.11065e-99	3.4514	1.4271e-94
ZNF18	5.10935e-24	-1.09274	1.42674e-19
RP11-796E10.1	5.10935e-50	4.70249	1.42674e-45
ITGA4	5.10918e-188	-3.01433	1.42669e-183
SLC38A3	5.10781e-18	5.03369	1.42631e-13
TCEAL2	5.10113e-12	2.2442	1.42444e-07
AL022341.3	5.10113e-12	2.50845	1.42444e-07
PANK2	5.09607e-38	-1.08425	1.42303e-33
GLB1	5.09594e-274	1.2699	1.42299e-269
SBK1	5.09558e-09	-1.64194	0.000142289
TUSC1	5.09385e-193	3.83152	1.42241e-188
RP1-136B1.1	5.09317e-12	3.01503	1.42222e-07
HIST2H2AA4	5.09307e-27	-1.043	1.42219e-22
CCDC88C	5.09161e-12	-1.48302	1.42178e-07
RGL4	5.08834e-25	-2.96948	1.42087e-20
HORMAD1	5.08589e-237	7.23972	1.42018e-232
RP11-676J12.7	5.08414e-18	2.38035	1.4197e-13
B3GNT8	5.08388e-233	4.30504	1.41962e-228
MLLT11	5.07994e-07	-2.854	0.0141852
MYO1G	5.07915e-213	-2.80276	1.4183e-208
ANKRD45	5.07628e-18	2.17597	1.4175e-13
SEMA6B	5.07431e-18	3.04714	1.41695e-13
SCN1B	5.07399e-57	3.88999	1.41686e-52
C2orf15	5.07335e-77	1.51899	1.41668e-72
LA16c-306E5.2	5.0705e-31	1.49609	1.41589e-26
CATSPER2	5.07027e-114	1.75949	1.41582e-109
HES5	5.07018e-09	3.90792	0.00014158
MAB21L3	5.07018e-09	3.32388	0.00014158
SLC9C1	5.07018e-09	3.58245	0.00014158
UGT3A2	5.07018e-09	3.46122	0.00014158
RGS20	5.07018e-09	3.17638	0.00014158
TYRP1	5.07018e-09	4.04723	0.00014158
RAB42	5.06749e-22	2.09987	1.41505e-17
NCF4	5.06409e-156	1.62994	1.4141e-151
AGBL5	5.06262e-100	1.86475	1.41369e-95
SNED1	5.06179e-208	4.98118	1.41345e-203
RASL11A	5.05937e-79	2.50601	1.41278e-74
CTD-2270L9.4	5.05839e-141	1.81941	1.4125e-136
PCSK9	5.05615e-31	2.81587	1.41188e-26
CTD-2008P7.9	5.05597e-56	4.67515	1.41183e-51
RP11-996F15.6	5.05297e-11	1.35089	1.41099e-06
EPG5	5.04949e-08	-1.63594	0.00141002
ASIC3	5.04915e-11	2.08445	1.40993e-06
PRDM10	5.04893e-08	-1.68718	0.00140986
CDC42	5.04579e-281	-1.17891	1.40899e-276
EPHX3	5.04533e-142	5.15459	1.40886e-137
CD244	5.04352e-247	-3.68901	1.40835e-242
NEURL3	5.0402e-51	6.67098	1.40742e-46
KCNMB1	5.03736e-13	1.40882	1.40663e-08
RP4-549L20.3	5.0356e-07	-1.79752	0.0140614
HSF4	5.03464e-180	4.29627	1.40587e-175
SLC16A9	5.03459e-41	5.75872	1.40586e-36
NCAPD3	5.03409e-29	-1.19449	1.40572e-24
GDF7	5.03245e-19	5.15878	1.40526e-14
CCDC129	5.03245e-19	5.21295	1.40526e-14
HTR3A	5.03245e-19	5.13056	1.40526e-14
BBOX1-AS1	5.03031e-141	7.86471	1.40466e-136
SCHIP1	5.02939e-16	4.73484	1.40441e-11
RP1-232P20.1	5.02939e-16	4.91537	1.40441e-11
CRYGN	5.02939e-16	4.59528	1.40441e-11
TFF1	5.02939e-16	4.92926	1.40441e-11
CLEC10A	5.02915e-22	2.50458	1.40434e-17
ZNF584	5.02778e-101	1.52804	1.40396e-96
RP11-305K5.1	5.02726e-07	-1.21875	0.0140381
CDK20	5.02421e-27	1.22611	1.40296e-22
FLI1	5.02345e-112	-3.5076	1.40275e-107
DEPDC4	5.02222e-21	2.74188	1.4024e-16
STK10	5.02059e-291	-3.15568	1.40195e-286
RPL26L1	5.0188e-306	1.08213	1.40145e-301
RP11-755F10.1	5.01401e-17	1.05874	1.40011e-12
SIK3	5.01256e-34	-1.08215	1.39971e-29
ACAP1	5.01e-242	-2.81203	1.39899e-237
DCP2	5.00721e-22	-1.03581	1.39821e-17
RUNX2	5.00421e-89	1.6591	1.39737e-84
HMGA2	5.0039e-57	6.31117	1.39729e-52
MARCKS	5.00254e-210	3.65597	1.39691e-205
ZNF711	5.00137e-23	1.13238	1.39658e-18
LINC01571	4.9989e-24	3.16733	1.39589e-19
ARNTL2	4.99582e-89	5.27749	1.39503e-84
CHGB	4.99544e-48	5.86195	1.39493e-43
TAGAP	4.99397e-101	-2.63111	1.39452e-96
TEAD4	4.99322e-23	2.10776	1.39431e-18
IFT140	4.99093e-154	3.25124	1.39367e-149
LINC01535	4.98765e-09	1.02282	0.000139275
SLC6A3	4.98706e-17	1.76977	1.39259e-12
DHDH	4.98465e-80	2.56476	1.39191e-75
RASGRP4	4.9827e-07	1.81852	0.0139137
FABP6	4.98192e-127	2.98847	1.39115e-122
GABRE	4.98082e-216	6.50889	1.39084e-211
RP11-77P16.4	4.97686e-09	1.40136	0.000138974
ZMYND15	4.97199e-76	2.92827	1.38838e-71
SLC16A2	4.97177e-31	2.99939	1.38832e-26
HIF1A-AS2	4.9695e-69	1.94857	1.38768e-64
TRGV7	4.96716e-30	-3.26684	1.38703e-25
STK17B	4.96409e-20	-1.35574	1.38617e-15
CD5	4.96367e-09	-1.21949	0.000138606
TSPAN2	4.96344e-93	-3.10049	1.38599e-88
SIDT1	4.96056e-26	-1.3674	1.38519e-21
PTGER2	4.95923e-224	-3.80635	1.38481e-219
PALMD	4.95871e-29	1.39479	1.38467e-24
NOTCH3	4.95817e-134	4.92668	1.38452e-129
GTF2E2	4.95633e-38	-1.13267	1.384e-33
ZNF121	4.9525e-44	-1.03549	1.38294e-39
ZSWIM1	4.95176e-38	2.80239	1.38273e-33
CACHD1	4.95072e-125	4.33128	1.38244e-120
HIST2H2BE	4.95023e-140	1.09813	1.3823e-135
RP11-176H8.1	4.9498e-38	2.94008	1.38218e-33
SLC28A3	4.94438e-55	5.52883	1.38067e-50
[truncated: 5,628 more rows]

## Sheet: Supplementary Table 2
Supplementary Table 2: DEGs in Eosinophils were identified by single-cell analysis
Gene	p_val	avg_log2FC	p_val_adj
SPP1	4.15427e-120	3.87876	1.16004e-115
CXCL14	3.22826e-118	4.84757	9.01458e-114
SFTPC	1.70148e-103	-2.00906	4.75123e-99
SCGB1A1	1.53703e-97	-1.24977	4.29201e-93
LTB	5.0475e-68	3.31226	1.40946e-63
SAA4	4.33614e-52	5.10426	1.21082e-47
SAA2	1.47883e-51	4.64141	4.12947e-47
IGHG3	2.00096e-51	3.02688	5.58748e-47
CEACAM5	1.0924e-50	4.07035	3.05042e-46
TRAC	9.66432e-49	2.41262	2.69866e-44
IGHA2	1.03989e-48	4.24303	2.90379e-44
SAA1	7.65275e-47	4.9923	2.13695e-42
IGHG4	3.23807e-46	2.90772	9.04199e-42
IFI27	1.07408e-45	1.54716	2.99927e-41
CCL18	1.30394e-39	-1.82978	3.64113e-35
IFI6	1.5533e-39	1.83276	4.33743e-35
LYZ	2.25812e-38	1.38895	6.30556e-34
DHRS9	6.24804e-38	1.77194	1.7447e-33
BST2	9.599e-38	2.49249	2.68042e-33
PIGR	7.43368e-37	1.12183	2.07578e-32
TRBC2	1.04965e-36	1.65544	2.93103e-32
RGS1	1.72737e-36	2.09208	4.82352e-32
IGLC3	2.83445e-35	1.13246	7.91492e-31
IFI44L	6.84494e-35	2.16775	1.91138e-30
CLDN2	8.63357e-31	4.93437	2.41084e-26
CXCR4	1.14284e-30	2.50846	3.19127e-26
PCDH7	1.31922e-30	1.66512	3.68379e-26
TNFRSF18	2.08339e-30	3.38523	5.81766e-26
CD79A	3.57006e-30	4.07189	9.96904e-26
ISG15	4.69411e-30	1.37113	1.31078e-25
FABP4	1.586e-29	-3.00958	4.42874e-25
ALDH1L1	5.82394e-29	1.96353	1.62628e-24
NAPSA	1.27253e-28	1.52924	3.5534e-24
PITX1	2.94383e-28	1.31331	8.22034e-24
XAF1	3.29727e-28	1.22708	9.20729e-24
SERPINB10	8.64749e-28	3.53665	2.41472e-23
IGLC2	6.11514e-27	1.75638	1.70759e-22
SAA2-SAA4	3.17079e-26	5.53082	8.85412e-22
TNFRSF4	3.98791e-26	2.82041	1.11358e-21
CX3CL1	1.93753e-25	1.54661	5.41035e-21
HLA-DRB5	2.33052e-25	1.8202	6.50775e-21
PSCA	2.74308e-25	1.29995	7.65978e-21
FN1	4.6098e-25	-1.65149	1.28724e-20
IGHG1	1.90364e-24	2.36326	5.31571e-20
ADGRF1	2.19043e-23	1.10573	6.11655e-19
CCL17	1.49644e-22	3.14951	4.17867e-18
TRBC1	1.81328e-22	1.79536	5.06339e-18
OAS1	1.94359e-22	1.47364	5.42728e-18
CD69	2.37508e-22	1.53987	6.63218e-18
KRT23	2.50059e-22	1.35177	6.98264e-18
ELANE	4.31782e-22	5.12491	1.20571e-17
IL32	9.99032e-22	1.07053	2.7897e-17
LIMD2	1.04572e-21	1.64523	2.92006e-17
FOXP3	1.82633e-21	3.48675	5.09983e-17
UST	1.8774e-21	2.51746	5.24245e-17
CXCL8	3.53148e-21	-2.20676	9.86129e-17
CD79B	4.85751e-21	3.35782	1.35641e-16
GPC3	8.09209e-21	-1.54392	2.25963e-16
INPP4B	1.02655e-20	1.41596	2.86654e-16
IFIT1	1.3438e-20	1.38902	3.75244e-16
MB	1.48281e-20	1.50276	4.1406e-16
HLA-DQA2	3.34575e-20	1.74383	9.34268e-16
LINC00326	3.74423e-20	1.91909	1.04554e-15
ACHE	1.51973e-19	4.36999	4.2437e-15
CD2	2.40986e-19	2.27238	6.7293e-15
EGLN3	9.26837e-19	1.14017	2.5881e-14
TM4SF1	1.49758e-18	-1.77246	4.18184e-14
GPR183	2.72723e-18	1.41531	7.6155e-14
BCAT1	3.09541e-18	2.54585	8.64361e-14
HERC6	5.3989e-18	1.14072	1.50759e-13
MIA	5.93031e-18	2.39669	1.65598e-13
CCL28	9.34096e-18	1.15624	2.60837e-13
CTA-384D8.35	9.45461e-18	3.46059	2.6401e-13
TSHZ2	1.75718e-17	1.99825	4.90676e-13
HLA-DOA	2.27708e-17	1.6799	6.35852e-13
GSDMB	2.30529e-17	1.4864	6.4373e-13
PTTG1	2.68479e-17	1.56043	7.497e-13
SNHG25	2.9713e-17	1.18401	8.29706e-13
METTL12	3.54922e-17	1.43883	9.91084e-13
HLA-DQA1	3.96258e-17	1.30677	1.10651e-12
ST6GAL1	4.72466e-17	1.04944	1.31931e-12
CRABP2	9.01337e-17	3.47953	2.51689e-12
CD3D	1.37158e-16	1.51857	3.83e-12
CD27	1.40396e-16	2.99756	3.92041e-12
AFAP1-AS1	4.45458e-16	5.86153	1.2439e-11
LARP6	5.12632e-16	1.1375	1.43147e-11
TNFRSF25	7.07246e-16	1.78846	1.97491e-11
OAS2	7.63976e-16	1.12617	2.13333e-11
CHI3L1	9.29168e-16	1.507	2.59461e-11
HPN	9.91516e-16	2.7298	2.76871e-11
CTLA4	9.95967e-16	2.83682	2.78114e-11
BCL2	1.4414e-15	1.95644	4.02496e-11
MUC13	1.70553e-15	2.98211	4.76253e-11
TMEM40	1.85901e-15	1.12256	5.1911e-11
IL2RA	2.61724e-15	3.28458	7.30839e-11
TBC1D1	2.81284e-15	1.27777	7.85458e-11
MMP12	3.67772e-15	4.41585	1.02697e-10
CD3E	4.17793e-15	1.39463	1.16665e-10
ENPP3	6.65551e-15	1.39522	1.85848e-10
SLC6A14	8.87968e-15	1.53428	2.47956e-10
U47924.27	1.0566e-14	1.1496	2.95045e-10
CLDN23	1.19868e-14	1.0448	3.34719e-10
PLVAP	1.31905e-14	5.57393	3.68332e-10
HPGD	1.33076e-14	1.35366	3.71601e-10
TEX26	1.54234e-14	1.49582	4.30683e-10
CORO1A	1.5796e-14	1.13781	4.41087e-10
SPOCK2	1.60829e-14	2.1873	4.49099e-10
HBA1	1.68641e-14	1.77303	4.70914e-10
RGS10	3.84808e-14	1.48715	1.07454e-09
CMYA5	4.9078e-14	1.12852	1.37045e-09
ICAM1	4.90863e-14	-1.64505	1.37069e-09
AREG	5.17014e-14	-1.72226	1.44371e-09
IGHA1	6.61824e-14	1.79162	1.84808e-09
MACROD2	7.44914e-14	1.00553	2.0801e-09
RHOH	8.91058e-14	1.63732	2.48819e-09
GPRC5A	1.45508e-13	-1.61228	4.06317e-09
FAM3D	1.7268e-13	1.65953	4.82191e-09
P2RY10	1.9937e-13	2.72289	5.5672e-09
EPSTI1	2.82924e-13	1.32134	7.90038e-09
NT5E	2.83889e-13	1.07671	7.92732e-09
HBA2	3.23817e-13	1.6275	9.04227e-09
HBG2	4.96799e-13	1.64648	1.38726e-08
TRAF3IP3	5.75287e-13	1.65194	1.60643e-08
MAP2K6	5.79978e-13	1.21751	1.61953e-08
DGKA	6.49409e-13	1.43724	1.81341e-08
ANXA6	6.61021e-13	1.21105	1.84583e-08
SLC28A2	7.18539e-13	1.26827	2.00645e-08
LGALS1	8.57255e-13	-1.15033	2.3938e-08
USP18	9.13899e-13	1.17332	2.55197e-08
GCNT1	9.77349e-13	1.08721	2.72915e-08
CTA-384D8.34	1.27405e-12	1.50204	3.55765e-08
KRT15	1.68048e-12	1.28327	4.69256e-08
SAMSN1	1.79283e-12	1.28992	5.00631e-08
IGKC	2.4438e-12	1.32118	6.82406e-08
IFI44	2.46445e-12	1.01341	6.88174e-08
LINC01170	3.09706e-12	1.55894	8.64823e-08
SOX21	3.31122e-12	2.00855	9.24624e-08
SLC1A5	4.13783e-12	1.06438	1.15545e-07
DNAJC12	5.78976e-12	-1.23974	1.61673e-07
IP6K3	6.65316e-12	5.03844	1.85783e-07
BATF	7.15214e-12	1.06865	1.99716e-07
CTD-2105E13.6	7.9843e-12	4.08072	2.22953e-07
IGHM	8.97441e-12	2.92673	2.50601e-07
IL2RG	1.20998e-11	1.22264	3.37874e-07
CXCL1	1.31717e-11	-1.1842	3.67807e-07
APOL3	1.52221e-11	1.05553	4.25062e-07
MUC21	1.61804e-11	1.71091	4.51822e-07
CPM	1.66888e-11	-1.10572	4.66017e-07
TMEM229B	1.73156e-11	2.54701	4.83522e-07
AC022182.3	1.80783e-11	2.4492	5.04818e-07
BCL2L11	1.99886e-11	1.05353	5.58163e-07
ITGB2-AS1	2.30865e-11	1.69437	6.44666e-07
TNFRSF12A	2.52044e-11	-1.67897	7.03808e-07
MELK	3.02516e-11	4.52002	8.44746e-07
MUC3A	3.13748e-11	3.77107	8.7611e-07
CD22	3.20837e-11	3.2038	8.95907e-07
B3GNT3	3.40903e-11	2.0114	9.51938e-07
HDAC9	3.4866e-11	1.54709	9.73598e-07
ITM2A	4.29049e-11	1.93855	1.19808e-06
QPRT	4.88124e-11	2.34255	1.36304e-06
TOX3	5.131e-11	1.01019	1.43278e-06
LRRN1	5.39885e-11	1.38845	1.50757e-06
IKBKE	5.79582e-11	1.48538	1.61843e-06
KCTD14	6.42195e-11	3.03064	1.79327e-06
CTD-2020K17.1	6.83633e-11	2.0581	1.90898e-06
HIST2H2AA4	7.55585e-11	1.26763	2.1099e-06
BAALC	9.00726e-11	1.56364	2.51519e-06
EMP1	9.03136e-11	-2.09926	2.52192e-06
SLC4A11	9.13012e-11	1.01293	2.54949e-06
DUOX2	9.90107e-11	2.20267	2.76477e-06
SLC16A9	1.26888e-10	1.68815	3.54322e-06
FZD8	1.39847e-10	1.35267	3.9051e-06
GABRP	1.52444e-10	2.03383	4.25684e-06
PSTPIP1	1.66695e-10	1.40656	4.65478e-06
CXCL13	1.70434e-10	4.3163	4.75919e-06
SERPINB2	1.95949e-10	1.48107	5.47168e-06
ASIC1	2.00519e-10	1.43352	5.5993e-06
SERPIND1	2.10064e-10	1.81177	5.86583e-06
ZG16B	2.12886e-10	3.62376	5.94462e-06
C8A	2.22587e-10	2.62315	6.21551e-06
MS4A1	2.25143e-10	2.86183	6.2869e-06
TRPM2	2.39043e-10	2.13609	6.67503e-06
PGC	2.51445e-10	2.00534	7.02136e-06
CRLF1	2.72009e-10	-1.21066	7.59557e-06
SLC15A2	2.88723e-10	1.1158	8.06231e-06
LINC00332	2.93665e-10	1.7337	8.20029e-06
TNFRSF13B	3.27429e-10	4.12931	9.14314e-06
RP11-297M9.1	3.30777e-10	4.71685	9.23661e-06
CXCL5	3.46285e-10	-4.36581	9.66966e-06
SEZ6L2	3.66649e-10	1.21904	1.02383e-05
HLA-DQB2	4.12766e-10	3.46159	1.15261e-05
CDCA7	4.50122e-10	2.35371	1.25692e-05
SKAP1	5.00948e-10	1.55239	1.39885e-05
IFITM1	5.1065e-10	1.51125	1.42594e-05
ADAM28	6.08954e-10	1.65868	1.70044e-05
HIST1H1D	7.00984e-10	1.98156	1.95743e-05
MAFF	7.12464e-10	-1.14867	1.98949e-05
ATP6V0A4	7.3206e-10	3.27382	2.0442e-05
HIST2H2AC	7.96824e-10	1.77352	2.22505e-05
PITX2	8.30198e-10	4.87453	2.31824e-05
LINC00491	8.30198e-10	4.28402	2.31824e-05
SLC26A4-AS1	8.30198e-10	4.49548	2.31824e-05
MAGEA12	8.30198e-10	4.77502	2.31824e-05
ST8SIA6-AS1	8.30198e-10	4.36363	2.31824e-05
CNR2	8.6581e-10	4.20793	2.41769e-05
RP11-356I2.4	9.44603e-10	1.01488	2.63771e-05
KCNA1	9.75983e-10	1.02697	2.72533e-05
IGLC7	1.13545e-09	3.64087	3.17063e-05
IL33	1.16021e-09	1.59823	3.23976e-05
CARD16	1.17514e-09	1.07783	3.28146e-05
LINC01535	1.43658e-09	2.06045	4.0115e-05
CD70	1.47304e-09	2.27811	4.11333e-05
SETD7	1.52395e-09	1.08612	4.25547e-05
MTUS2	1.54522e-09	1.59908	4.31487e-05
RP11-281P23.1	1.79001e-09	1.20301	4.99843e-05
ICOS	1.80635e-09	2.30776	5.04406e-05
RP11-680N20.1	1.82617e-09	1.21217	5.09939e-05
NOS3	1.87968e-09	2.14849	5.24881e-05
CD7	2.09381e-09	1.61552	5.84674e-05
EDA	2.40364e-09	1.33588	6.71193e-05
ARHGAP9	2.62513e-09	1.33763	7.33043e-05
IL4I1	2.65669e-09	2.35086	7.41854e-05
ADIRF	3.30659e-09	-1.32372	9.23331e-05
JAK3	4.93057e-09	2.0683	0.000137681
SERPINE1	5.03547e-09	2.5057	0.000140611
UBD	5.16879e-09	3.53745	0.000144333
ERRFI1	6.57234e-09	-1.14643	0.000183526
PXDN	8.00873e-09	2.57611	0.000223636
P2RX5	8.32507e-09	3.49364	0.000232469
CAND2	8.33133e-09	1.35344	0.000232644
ALOX15B	8.91449e-09	2.6485	0.000248928
TRIM31	9.19599e-09	1.97781	0.000256789
MAPK12	9.64246e-09	3.64982	0.000269256
TMIGD2	9.71621e-09	2.81751	0.000271315
BCL3	1.1857e-08	-1.05198	0.000331095
CMTM3	1.26809e-08	1.59899	0.000354101
CDH13	1.34581e-08	1.68829	0.000375805
CXCR6	1.35527e-08	1.81048	0.000378446
RP11-607P23.1	1.39446e-08	3.74641	0.00038939
ERN2	1.54949e-08	1.06395	0.000432679
TMEM163	1.58134e-08	1.90069	0.000441572
PHEX	1.97989e-08	2.2042	0.000552864
PTN	1.98734e-08	1.9234	0.000554944
KHDRBS3	2.06822e-08	1.70352	0.00057753
CDK1	2.11475e-08	1.20104	0.000590524
IFNG	2.12915e-08	1.17267	0.000594543
MCM2	2.17037e-08	1.20334	0.000606055
RP1-127D3.4	2.38825e-08	1.33999	0.000666895
STYK1	2.70916e-08	1.16671	0.000756505
ANK1	2.75452e-08	3.86926	0.000769172
ADAMTSL2	2.78129e-08	3.79174	0.000776647
TTR	2.78129e-08	3.68773	0.000776647
NID1	2.80831e-08	3.34372	0.000784192
GRASP	3.11608e-08	1.4987	0.000870135
RP5-1028K7.2	3.24963e-08	2.27492	0.000907428
GIMAP2	3.4374e-08	1.25436	0.000959858
TP53AIP1	3.4452e-08	1.41846	0.000962037
DAPK1	3.51263e-08	-1.10125	0.000980866
CXCR3	3.53736e-08	2.09177	0.000987772
TMEM37	3.65681e-08	2.12087	0.00102113
SLFN12	3.73625e-08	1.05267	0.00104331
TESC	3.94885e-08	1.68555	0.00110268
TOX2	4.04057e-08	2.90909	0.00112829
RP11-430H10.1	4.32197e-08	1.08908	0.00120687
AC133644.2	4.76829e-08	1.67584	0.0013315
ROBO1	5.26853e-08	1.36883	0.00147118
SUSD2	5.51126e-08	1.35962	0.00153896
CHIT1	5.95986e-08	2.49744	0.00166423
SIRPG	5.98057e-08	3.31428	0.00167002
MXRA8	6.00136e-08	3.07095	0.00167582
SMC1B	6.13049e-08	2.96999	0.00171188
CNIH3	6.18859e-08	1.293	0.0017281
AC144450.2	6.95379e-08	1.13261	0.00194178
PDCD1	7.00681e-08	2.71192	0.00195658
RP11-798L4.1	7.5118e-08	2.30789	0.0020976
GAPT	7.53272e-08	2.05639	0.00210344
PTPN7	8.42965e-08	1.51412	0.0023539
TTC39C-AS1	8.75124e-08	1.00779	0.0024437
CD1B	8.89416e-08	5.693	0.0024836
LINC01281	9.09258e-08	3.36434	0.00253901
ITIH6	9.09258e-08	3.59315	0.00253901
SLC16A7	9.22908e-08	2.11676	0.00257713
KRT13	9.31418e-08	2.01255	0.00260089
SEPHS2	9.58259e-08	1.30915	0.00267584
CCR7	1.03898e-07	1.7617	0.00290124
INHA	1.06346e-07	4.30197	0.00296961
AC114730.5	1.06346e-07	4.96864	0.00296961
SOX14	1.06346e-07	3.9783	0.00296961
COX7B2	1.06346e-07	4.15395	0.00296961
SPINK13	1.06346e-07	4.30851	0.00296961
CSAG1	1.06346e-07	4.47918	0.00296961
HOXC11	1.06346e-07	4.48159	0.00296961
HOXC6	1.06346e-07	4.3893	0.00296961
RP11-542B15.1	1.06346e-07	4.01685	0.00296961
RP11-357H14.17	1.06346e-07	6.12249	0.00296961
IGLV3-21	1.06346e-07	4.67792	0.00296961
PLAT	1.06909e-07	2.49717	0.00298533
AQP1	1.10633e-07	1.1508	0.00308931
SIT1	1.13376e-07	2.63229	0.00316593
ADAP2	1.71394e-07	1.00963	0.004786
CAV1	1.93559e-07	-1.40312	0.00540494
XDH	2.05508e-07	2.6758	0.0057386
AL773572.7	2.09926e-07	1.81017	0.00586197
PPBP	2.12418e-07	-4.22444	0.00593157
LINC00339	2.17596e-07	1.0538	0.00607614
FLRT3	2.30242e-07	-1.34813	0.00642928
LINC00479	2.3122e-07	2.30168	0.00645659
RP5-1021I20.1	2.31745e-07	1.49503	0.00647125
CD40LG	2.39115e-07	2.27124	0.00667704
AURKB	2.78699e-07	2.17501	0.00778239
AC011899.10	2.81327e-07	1.08301	0.00785578
SIX2	3.06281e-07	2.39921	0.00855258
ZEB1	3.08875e-07	1.75837	0.00862502
RP11-281A20.1	3.44656e-07	1.08953	0.00962416
CCL21	3.60017e-07	-4.27258	0.0100531
SHISA8	3.7541e-07	2.88899	0.010483
CCR4	4.1634e-07	2.87605	0.0116259
SCG3	4.17815e-07	2.56952	0.0116671
MTRNR2L1	4.33711e-07	2.57415	0.0121109
RP11-47L3.1	4.48976e-07	2.02062	0.0125372
HIST1H3H	4.59475e-07	1.5811	0.0128304
RP11-612A1.1	4.67135e-07	1.32287	0.0130443
AC005523.3	4.92894e-07	1.59066	0.0137636
DUOXA2	4.95473e-07	3.5502	0.0138356
AC001226.7	4.98207e-07	2.43757	0.0139119
AC072062.1	5.00355e-07	1.42314	0.0139719
KDELC1	5.09286e-07	2.44581	0.0142213
LCN2	5.21978e-07	2.43994	0.0145757
FUT3	5.52487e-07	1.1766	0.0154276
IGHG2	5.7542e-07	2.40892	0.016068
CD37	6.62831e-07	1.03442	0.0185089
RP1-140K8.5	6.88979e-07	1.55752	0.019239
TNNI2	6.98654e-07	-1.44016	0.0195092
PROC	7.97525e-07	2.0639	0.0222701
RP11-92G12.3	8.53103e-07	1.97279	0.0238221
TNFRSF9	8.88778e-07	2.60961	0.0248182
RP11-314N13.3	9.18491e-07	1.98724	0.025648
COL3A1	9.34061e-07	1.69736	0.0260827
KLHDC7B	9.47214e-07	1.89926	0.02645
TIGIT	9.9718e-07	2.24665	0.0278453
CTHRC1	1.02485e-06	3.92787	0.0286178
TBC1D4	1.11462e-06	1.09152	0.0311247
CD96	1.11822e-06	2.07196	0.0312253
HIST1H2BH	1.17208e-06	1.24312	0.0327292
SLC1A3	1.26424e-06	1.62056	0.0353025
CHL1	1.35882e-06	1.09633	0.0379437
HABP2	1.36917e-06	2.91423	0.0382328
MIR3142HG	1.445e-06	2.36006	0.0403501
RP3-395M20.9	1.6282e-06	1.58044	0.0454658
COL6A3	1.63429e-06	1.04544	0.045636
DCT	1.63628e-06	1.48495	0.0456915
RRS1-AS1	1.65127e-06	1.25572	0.04611
SRPX2	1.68255e-06	1.85352	0.0469834
PAG1	1.74985e-06	1.30585	0.0488628

## Sheet: Supplementary Table 3
Supplementary Table 3: DEGs in Macrophages were identified by single-cell analysis
Gene	p_val	avg_log2FC	p_val_adj
SCGB1A1	5.2657e-63	-8.52508	1.47039e-58
GZMH	4.44763e-44	-7.24701	1.24196e-39
CXCL8	1.57261e-26	-6.48245	4.39136e-22
GNLY	1.56559e-24	-5.78856	4.37176e-20
FABP4	1.77569e-24	-6.33204	4.95844e-20
NKG7	1.54241e-23	-5.08698	4.30702e-19
KLF2	4.0957e-22	-5.90649	1.14368e-17
MT1E	5.41543e-21	-4.22327	1.5122e-16
MT1M	3.44486e-19	-9.10819	9.61942e-15
SCGB3A1	4.02767e-18	-2.99826	1.12469e-13
PRF1	1.37894e-17	-5.09943	3.85054e-13
VIM	7.75629e-17	-2.87129	2.16587e-12
GZMK	1.85704e-16	-7.5547	5.1856e-12
RRAD	2.51749e-16	-4.10292	7.02984e-12
KLF6	3.48709e-16	-3.11144	9.73735e-12
MIR3945HG	2.06102e-14	-8.81489	5.75519e-10
RP11-76C10.5	2.06102e-14	-6.87567	5.75519e-10
ICAM4	2.48882e-14	-6.7554	6.94979e-10
HLA-C	3.05162e-14	-2.37349	8.52135e-10
FOS	2.32972e-13	-2.85801	6.50551e-09
NFKBIA	3.31485e-13	-3.36667	9.25639e-09
CCL5	3.74259e-13	-3.83119	1.04508e-08
MT1G	1.56586e-12	-7.09971	4.37252e-08
XAGE2	2.16097e-12	-4.94935	6.03431e-08
PPP1R15A	5.53939e-12	-2.64223	1.54682e-07
CST7	1.81828e-11	-3.86982	5.07735e-07
CD247	5.05506e-11	-4.57485	1.41157e-06
LMNA	9.20208e-11	-2.59909	2.56959e-06
FGFBP2	9.45203e-11	-8.42652	2.63939e-06
JUND	1.01228e-10	-2.22158	2.8267e-06
SAMD3	2.42701e-10	-4.77156	6.77717e-06
JUN	3.46447e-10	-2.15674	9.67419e-06
EREG	4.47636e-10	-7.75837	1.24998e-05
RIMS1	4.47636e-10	-5.33648	1.24998e-05
PRMT8	4.47636e-10	-5.53053	1.24998e-05
PTGDR	4.47636e-10	-7.96003	1.24998e-05
CTB-186H2.3	4.47636e-10	-7.87803	1.24998e-05
FPR1	4.47636e-10	-6.75777	1.24998e-05
PTGS2	4.65504e-10	-4.40288	1.29987e-05
TRDC	1.19838e-09	-4.15713	3.34635e-05
WIF1	2.44461e-09	-2.62517	6.82634e-05
S100A11	4.32563e-09	1.91786	0.000120789
BATF	6.12085e-09	-3.19211	0.000170918
PGC	9.32528e-09	-2.52367	0.000260399
MNDA	1.04471e-08	-3.5532	0.000291726
HLA-A	1.78986e-08	-1.82934	0.000499801
C11orf96	1.82605e-08	-2.73287	0.000509907
KLRF1	2.57224e-08	-5.3447	0.000718273
HLA-DMB	2.90648e-08	-3.17398	0.000811604
PRDX1	3.75572e-08	2.99664	0.00104875
AQP3	4.60622e-08	-2.89129	0.00128624
SAT1	4.74771e-08	-1.3279	0.00132575
SPP1	5.28223e-08	10.1789	0.00147501
CXCL2	7.445e-08	-4.36715	0.00207894
CD9	7.89803e-08	2.07155	0.00220544
HLA-DRB1	8.05096e-08	-1.83379	0.00224815
MALAT1	9.37344e-08	-1.30805	0.00261744
GAPDH	9.51814e-08	2.57179	0.00265784
RPL39	1.18203e-07	1.02018	0.0033007
RGS2	1.44546e-07	-3.35212	0.00403631
HLA-B	1.56698e-07	-1.59075	0.00437564
RGS13	1.67385e-07	-2.57112	0.00467405
FXYD3	1.67799e-07	4.19503	0.00468561
CCL4	1.77327e-07	-3.53317	0.00495167
PLIN2	1.77438e-07	-3.52613	0.00495478
PERP	1.84514e-07	4.25622	0.00515238
ZFAS1	1.93476e-07	2.61219	0.00540262
KLRD1	2.23454e-07	-3.74656	0.00623973
ZFP36	2.26762e-07	-2.69219	0.00633211
P2RY8	2.5837e-07	-6.16606	0.00721472
MIF	2.96462e-07	2.64182	0.00827839
NDUFB5	2.99604e-07	5.59429	0.00836615
AKR1B10	3.38585e-07	7.82302	0.00945466
MT2A	3.70943e-07	-2.39616	0.0103582
PDIA6	4.06213e-07	2.86684	0.0113431
NOV	4.31702e-07	-6.00881	0.0120548
CES1	4.72732e-07	4.39404	0.0132006
PPP1CB	5.25062e-07	2.68555	0.0146618
GZMA	6.25584e-07	-4.01657	0.0174688
ITGA8	6.55043e-07	-4.81448	0.0182914
FCRL6	6.86319e-07	-4.85185	0.0191648
RP1-199J3.7	6.86319e-07	-5.10915	0.0191648
HPR	6.86319e-07	-5.89339	0.0191648
TBX21	6.86319e-07	-4.96681	0.0191648
RP11-4B16.4	6.86319e-07	-4.60622	0.0191648
ANP32B	6.92064e-07	3.0942	0.0193252
CCL20	6.92321e-07	-6.80664	0.0193324
IL6R	6.98316e-07	-3.55208	0.0194998
CD244	7.19032e-07	-4.67799	0.0200782
C16orf54	9.97963e-07	-3.87872	0.0278671
CLIC3	1.04649e-06	-2.38923	0.0292223
ANXA1	1.1343e-06	-1.16761	0.0316743
SPARCL1	1.35534e-06	7.7014	0.0378466
GPX2	1.44947e-06	7.19302	0.0404749
AKR1C2	1.77071e-06	7.54171	0.0494454

## Sheet: Supplementary Table 4
Supplementary Table 4: DEGs in Monocytes were identified by single-cell analysis.
Gene	p_val	avg_log2FC	p_val_adj
CTC-250I14.6	1.41856e-06	1.00078	0.0396119
INPP5F	1.23797e-06	1.06388	0.0345691
PCP4L1	1.20862e-06	2.29622	0.0337495
EPN3	9.61567e-07	1.11219	0.0268508
FCER2	8.96271e-07	1.21103	0.0250275
BARX2	7.17467e-07	1.42791	0.0200345
PARD6G-AS1	5.23842e-07	1.48568	0.0146278
COLCA2	4.7019e-07	-1.11295	0.0131296
SHROOM2	4.49623e-07	1.16994	0.0125553
RP11-354P11.3	4.36653e-07	1.00787	0.0121931
RP11-597D13.8	3.7958e-07	1.52963	0.0105994
ZC2HC1A	3.5056e-07	1.22673	0.00978903
CECR7	3.30253e-07	1.93766	0.00922197
TNK1	3.2935e-07	1.38479	0.00919678
TMEM266	3.12665e-07	1.91085	0.00873087
CNTD1	3.01435e-07	-1.04118	0.00841728
TSPAN9	2.13068e-07	1.00822	0.00594971
SLC6A14	1.02283e-07	-1.30721	0.00285616
ACSM3	9.05654e-08	1.2195	0.00252895
PTPRH	8.86854e-08	1.05772	0.00247645
CTD-2035E11.5	8.57594e-08	1.1269	0.00239475
NDNF	7.32694e-08	1.13773	0.00204597
MMP1	6.31724e-08	2.66603	0.00176403
IGHG3	4.19299e-08	1.31946	0.00117085
ZNF311	4.05117e-08	1.01199	0.00113125
MUC15	3.80521e-08	-1.11826	0.00106257
PLEKHH1	3.12376e-08	1.05721	0.000872278
C1orf228	2.69381e-08	1.03701	0.00075222
PCBP3	2.34869e-08	1.07377	0.000655849
CDA	2.30049e-08	-1.24738	0.000642388
STXBP6	1.95542e-08	1.43531	0.000546031
RP11-624L4.2	1.75648e-08	1.38954	0.000490478
CAGE1	1.73645e-08	1.11714	0.000484885
RP11-268J15.5	1.72087e-08	1.23137	0.000480535
KIAA1462	1.52053e-08	-1.04926	0.000424594
AC131056.3	1.43803e-08	-1.09356	0.000401556
COLGALT2	1.41118e-08	-1.06852	0.000394059
TNNI3	1.34998e-08	1.1301	0.00037697
RP5-940J5.9	1.23537e-08	1.27345	0.000344965
RP11-540A21.2	1.04842e-08	1.15388	0.000292761
MCF2L2	9.59887e-09	1.09272	0.000268039
HEY1	7.91738e-09	1.31284	0.000221085
C2CD4A	7.77614e-09	2.11987	0.000217141
RP11-440D17.3	5.547e-09	1.54121	0.000154894
MEIS1	4.4613e-09	-1.3982	0.000124577
HHIP	3.6064e-09	-1.22371	0.000100705
C15orf48	3.11604e-09	1.50698	8.70123e-05
NOS3	2.9014e-09	1.05738	8.10186e-05
MPV17L	2.89192e-09	1.05352	8.07538e-05
ADGRG5	2.28451e-09	-1.16814	6.37927e-05
POSTN	1.9646e-09	1.49633	5.48596e-05
DBNDD1	1.8401e-09	1.65049	5.1383e-05
ACKR2	1.73361e-09	1.67281	4.84093e-05
FBLIM1	1.44027e-09	1.03324	4.0218e-05
GPR39	1.42175e-09	1.03629	3.9701e-05
GHET1	1.30841e-09	1.25368	3.65361e-05
RP3-466P17.1	9.84433e-10	1.19427	2.74893e-05
HOXC4	7.26914e-10	-1.36735	2.02984e-05
ZNF703	5.62442e-10	-1.68608	1.57056e-05
APOC4-APOC2	4.62292e-10	1.13339	1.2909e-05
UBXN10-AS1	4.07692e-10	1.22154	1.13844e-05
DMC1	3.43829e-10	1.42671	9.60107e-06
POU2AF1	3.27297e-10	1.28845	9.13944e-06
SLC25A15	2.30533e-10	1.00934	6.43741e-06
FAM83A	2.21729e-10	1.19768	6.19156e-06
DKK3	2.20468e-10	1.29931	6.15634e-06
RP11-66N24.6	2.1669e-10	1.80236	6.05086e-06
WNT4	2.05055e-10	1.15906	5.72596e-06
PADI4	1.96578e-10	-1.07757	5.48924e-06
PITPNM3	1.53457e-10	1.13207	4.28515e-06
SNX22	1.40584e-10	1.35213	3.92567e-06
FCRL2	1.08684e-10	1.47366	3.03488e-06
RP11-60L3.1	9.15996e-11	-1.09181	2.55783e-06
CTC-543D15.8	8.86174e-11	-1.11517	2.47455e-06
TAS2R30	8.7226e-11	1.02803	2.4357e-06
MROH7	8.57326e-11	1.86571	2.394e-06
ZNF774	8.41516e-11	1.13816	2.34985e-06
DDX11-AS1	7.85526e-11	1.18865	2.1935e-06
IQCA1	6.62094e-11	-1.36366	1.84883e-06
HORMAD1	6.46197e-11	1.84456	1.80444e-06
RP11-110I1.12	5.92487e-11	1.05322	1.65446e-06
MFSD4	5.43884e-11	1.45312	1.51874e-06
USP18	5.28857e-11	1.0636	1.47678e-06
CD22	5.24685e-11	2.31525	1.46513e-06
LRG1	4.50717e-11	-1.27313	1.25858e-06
KCNE5	4.29767e-11	1.28016	1.20008e-06
SLC2A12	3.93093e-11	1.05167	1.09767e-06
METTL8	2.77922e-11	1.03002	7.76071e-07
LILRA1	2.68268e-11	-1.55128	7.49111e-07
MIR181A2HG	2.60814e-11	-2.1847	7.28296e-07
KIF26B	2.29261e-11	1.98426	6.40189e-07
C1orf61	1.6435e-11	-1.31775	4.5893e-07
AC008268.1	1.38328e-11	1.30641	3.86267e-07
EPB41L4B	1.24516e-11	-1.26433	3.47698e-07
PLCL1	1.17717e-11	1.02927	3.28714e-07
MAP6	1.01106e-11	-1.24468	2.82328e-07
CD109	9.82769e-12	1.28446	2.74429e-07
FAM72C	8.96716e-12	1.51992	2.50399e-07
CFTR	8.43402e-12	-1.24583	2.35512e-07
SEMA3A	8.41276e-12	1.28232	2.34918e-07
C1QL1	7.36705e-12	1.60777	2.05717e-07
ID4	6.29793e-12	-1.22399	1.75863e-07
APLP1	5.08365e-12	1.03758	1.41956e-07
CTD-2371O3.2	4.62364e-12	1.33889	1.29111e-07
FAM57A	4.17411e-12	1.08428	1.16558e-07
B4GALT6	3.9057e-12	-1.75308	1.09063e-07
GAS6-AS1	3.71536e-12	1.08726	1.03748e-07
FRMD6	2.85103e-12	1.11809	7.96122e-08
NKX2-1-AS1	2.71829e-12	1.2997	7.59056e-08
SMOC1	2.5822e-12	1.87118	7.21053e-08
RP11-1275H24.2	2.55342e-12	1.14479	7.13018e-08
DIO1	2.43783e-12	1.26563	6.80739e-08
IFNL1	2.01652e-12	-1.73655	5.63094e-08
GREB1	1.82652e-12	1.4847	5.10037e-08
FBXO27	1.82294e-12	1.89428	5.09038e-08
PDLIM3	1.69852e-12	1.25522	4.74294e-08
SPTBN2	1.56022e-12	1.38043	4.35676e-08
SLCO4C1	1.52329e-12	-1.39521	4.25364e-08
RP11-98I9.4	1.27428e-12	1.01118	3.55831e-08
ESRRG	1.26502e-12	-2.05541	3.53244e-08
C2orf88	8.50496e-13	1.43047	2.37493e-08
TMCC3	7.41689e-13	-1.14457	2.07109e-08
EDA2R	7.26531e-13	1.35859	2.02876e-08
TTI1	5.51094e-13	1.20745	1.53888e-08
TNS4	5.33805e-13	1.25006	1.4906e-08
CTD-2639E6.9	4.87188e-13	-1.24983	1.36042e-08
LACTB2-AS1	4.7989e-13	1.20923	1.34005e-08
FERMT2	4.43455e-13	1.19157	1.2383e-08
MYB	3.58003e-13	1.43773	9.99688e-09
RP11-850A17.1	3.38966e-13	1.08212	9.46528e-09
AUNIP	3.25041e-13	1.35026	9.07643e-09
SPIN3	3.24231e-13	1.69222	9.05382e-09
PSCA	2.37327e-13	-1.65031	6.62711e-09
PGF	2.01241e-13	1.35501	5.61946e-09
PRKAA2	1.95346e-13	-1.13423	5.45483e-09
PLPP1	1.6599e-13	1.78794	4.63509e-09
FGFBP1	1.44003e-13	-1.44282	4.02113e-09
LGALS12	1.39668e-13	1.05168	3.90008e-09
HHIP-AS1	1.3432e-13	1.26776	3.75074e-09
CTB-58E17.3	1.26817e-13	1.31052	3.54123e-09
ARHGAP40	1.22488e-13	1.43251	3.42036e-09
AGBL4	1.18211e-13	-2.14652	3.30093e-09
CENPE	1.16747e-13	1.39381	3.26005e-09
CCL8	1.10233e-13	1.27695	3.07814e-09
CACNA1D	1.07822e-13	1.32828	3.01082e-09
JSRP1	1.02833e-13	1.21117	2.8715e-09
DGUOK-AS1	1.02222e-13	1.5179	2.85444e-09
PLVAP	9.58572e-14	1.5752	2.67672e-09
OSBP2	7.6111e-14	1.14335	2.12532e-09
SLCO2A1	7.27013e-14	1.0219	2.03011e-09
GPC2	5.9627e-14	1.66325	1.66502e-09
RP11-398C13.6	5.80065e-14	1.01888	1.61977e-09
PCDH7	4.93953e-14	1.82718	1.37932e-09
PPM1H	4.89401e-14	1.55943	1.3666e-09
TNFRSF10C	4.87435e-14	-1.587	1.36111e-09
SCEL	4.61467e-14	1.29762	1.2886e-09
C1orf168	4.37289e-14	-1.27444	1.22109e-09
MAP10	4.01811e-14	1.07395	1.12202e-09
ALG1L	3.46307e-14	1.02233	9.67028e-10
TMEM27	3.35369e-14	1.93862	9.36486e-10
CRLF2	2.44773e-14	1.42402	6.83503e-10
CBLC	2.33952e-14	1.33762	6.53288e-10
RP11-1348G14.4	2.1317e-14	1.05928	5.95257e-10
PNMA3	1.79803e-14	1.78022	5.02081e-10
SPIN2A	1.79229e-14	1.29116	5.00478e-10
ATP6V1C2	1.56907e-14	1.36991	4.38146e-10
DNAH3	1.45361e-14	-1.32955	4.05906e-10
LRRC32	1.26729e-14	1.50034	3.53879e-10
GNAL	1.25787e-14	-1.64504	3.51246e-10
RP11-59C5.3	1.18588e-14	-1.18399	3.31145e-10
CACNA2D1	1.1115e-14	3.03916	3.10376e-10
TPD52L1	7.31127e-15	1.32891	2.0416e-10
RP11-583F2.5	7.21811e-15	1.04695	2.01558e-10
ADGRF1	4.544e-15	1.10739	1.26887e-10
DRAXIN	4.40682e-15	-1.22859	1.23056e-10
ALS2CR11	4.22635e-15	1.51351	1.18017e-10
MICU3	3.46379e-15	1.05434	9.6723e-11
TMEM233	3.3753e-15	1.91103	9.42519e-11
CA8	3.32658e-15	-1.38225	9.28914e-11
COL26A1	3.21423e-15	1.16788	8.97541e-11
RHCG	2.96936e-15	-1.28754	8.29165e-11
DNAJC22	2.87554e-15	2.16734	8.02967e-11
MICALL2	2.86513e-15	1.05356	8.00058e-11
KCTD21-AS1	2.52916e-15	1.15609	7.06243e-11
FAM167A	2.46524e-15	1.10298	6.88393e-11
GPX2	2.42648e-15	1.96612	6.7757e-11
NINL	2.2513e-15	-1.54866	6.28652e-11
RP11-469H8.6	2.14332e-15	1.58535	5.98499e-11
GCNT4	2.06975e-15	1.58814	5.77957e-11
ORC1	2.01285e-15	1.08856	5.62068e-11
RP11-37C7.3	1.79096e-15	1.06265	5.00109e-11
DANT2	1.50275e-15	1.04596	4.19629e-11
MEIS2	1.29852e-15	1.46909	3.62599e-11
MFSD6L	1.18957e-15	1.98875	3.32176e-11
REEP1	1.00278e-15	-1.51226	2.80016e-11
CDC20B	1.00012e-15	1.77987	2.79273e-11
SOX6	9.62438e-16	-1.07679	2.68751e-11
COL4A1	8.92702e-16	1.94157	2.49278e-11
CTD-3088G3.8	8.61273e-16	-1.33833	2.40502e-11
AGAP2-AS1	8.34484e-16	1.3767	2.33021e-11
SLC5A2	7.97906e-16	1.29008	2.22807e-11
RP11-268P4.4	6.25714e-16	1.61839	1.74724e-11
FAM69B	5.80057e-16	1.19752	1.61975e-11
C9orf152	4.59532e-16	1.48804	1.2832e-11
TMOD1	4.01536e-16	1.58365	1.12125e-11
DEPDC7	3.76289e-16	1.28893	1.05075e-11
ITGB3	3.24166e-16	1.1672	9.052e-12
INHBB	3.13808e-16	-1.1959	8.76277e-12
PTX3	2.81018e-16	-1.66287	7.84716e-12
SBK1	2.76439e-16	-1.32393	7.71928e-12
MEX3B	2.69464e-16	1.24883	7.52452e-12
HSPA6	2.41545e-16	1.11088	6.7449e-12
DOCK4	2.36514e-16	1.04772	6.60443e-12
AC017002.2	2.2968e-16	1.34546	6.4136e-12
TLDC2	2.20169e-16	2.42592	6.148e-12
ITGA9	2.09897e-16	1.12753	5.86115e-12
MISP	2.05522e-16	-1.54899	5.73899e-12
ATG9B	1.96038e-16	1.29634	5.47416e-12
RP11-474I16.8	1.81724e-16	1.5033	5.07447e-12
PLA2R1	1.54016e-16	-1.25256	4.30075e-12
B3GNT3	1.28718e-16	1.55197	3.59431e-12
RP11-340F14.6	1.21626e-16	-1.10334	3.39627e-12
FAM169A	1.00251e-16	-1.13113	2.79942e-12
ENHO	9.33648e-17	-1.27047	2.60712e-12
AC007405.6	8.09734e-17	1.22254	2.2611e-12
DCLK2	7.70535e-17	1.16124	2.15164e-12
CXXC4	6.23193e-17	-1.67165	1.7402e-12
MIA	6.18355e-17	2.24428	1.72669e-12
RP11-192H23.6	4.75971e-17	1.21118	1.3291e-12
CTC-503J8.4	4.36452e-17	1.33875	1.21875e-12
CYP1B1	3.89781e-17	-1.92207	1.08842e-12
PAK3	3.73821e-17	1.38102	1.04386e-12
CTD-2047H16.4	3.32376e-17	1.23099	9.28127e-13
CCDC81	3.28029e-17	-1.39404	9.15989e-13
ARVCF	3.234e-17	-1.67679	9.03061e-13
SIGLEC12	2.72207e-17	1.42855	7.60111e-13
ANGPTL6	2.20304e-17	1.36388	6.15177e-13
ROR1	1.80078e-17	1.12385	5.02851e-13
ZNF469	1.6863e-17	1.13656	4.70884e-13
RP11-693J15.5	1.64236e-17	1.90508	4.58612e-13
FAM95C	1.47698e-17	-1.07881	4.12433e-13
HIST1H4D	1.47132e-17	1.3838	4.10852e-13
OAZ3	1.18821e-17	1.17903	3.31796e-13
INSL3	1.01482e-17	1.28694	2.83379e-13
HS6ST2	8.73648e-18	2.15159	2.43957e-13
KRT72	8.56536e-18	-1.17777	2.39179e-13
FUT8-AS1	7.76751e-18	1.08264	2.169e-13
LCN12	6.85585e-18	1.48222	1.91443e-13
RP11-373D23.3	6.17955e-18	-1.0507	1.72558e-13
GGT6	5.87688e-18	1.03197	1.64106e-13
AC011043.1	5.40181e-18	1.66386	1.5084e-13
ANTXR1	4.87554e-18	1.23253	1.36145e-13
AADAT	4.44042e-18	1.72845	1.23994e-13
BFSP1	4.15624e-18	-2.14565	1.16059e-13
ANGPTL4	4.02061e-18	1.62114	1.12271e-13
MRVI1	2.35319e-18	-1.86062	6.57104e-14
RP11-713M15.2	1.98997e-18	-1.423	5.55679e-14
B3GNT9	1.58421e-18	1.13941	4.42375e-14
KDM4A-AS1	1.53455e-18	1.13856	4.28508e-14
CLMP	1.20042e-18	1.30238	3.35205e-14
FGFR3	1.07082e-18	1.03395	2.99017e-14
RP11-399K21.13	9.51718e-19	1.63885	2.65758e-14
PANK1	8.89065e-19	1.3007	2.48263e-14
MTCL1	6.49848e-19	1.80633	1.81464e-14
CTSV	5.99921e-19	1.50639	1.67522e-14
SORCS2	5.91759e-19	1.20429	1.65243e-14
POU2F3	5.56783e-19	1.78128	1.55476e-14
FAM72B	4.66428e-19	1.14784	1.30245e-14
GPR135	4.3619e-19	-1.03664	1.21802e-14
GRB7	3.47761e-19	1.11326	9.71086e-15
PSD	3.08813e-19	1.69178	8.6233e-15
GPR37	2.94113e-19	2.56067	8.2128e-15
RIC3	2.28654e-19	1.08149	6.38494e-15
DPCR1	2.2415e-19	1.55122	6.25917e-15
PDE6G	2.20313e-19	1.02254	6.15203e-15
DRAIC	2.15317e-19	1.31285	6.01251e-15
PRKD1	2.06077e-19	1.49082	5.7545e-15
ENPP1	1.684e-19	1.24144	4.70241e-15
HERC6	1.37621e-19	1.01514	3.84292e-15
CHRNA1	1.3233e-19	2.4558	3.69517e-15
JPH1	1.30683e-19	1.70307	3.64918e-15
PLD6	9.78808e-20	1.28494	2.73322e-15
CFAP61	9.11761e-20	-2.0128	2.546e-15
EME1	8.70896e-20	1.44341	2.43189e-15
TNFRSF17	7.50284e-20	1.6512	2.09509e-15
LINC00863	5.4154e-20	1.3587	1.5122e-15
PAPLN	4.92973e-20	1.31406	1.37658e-15
ALDH1A3	4.72062e-20	-1.44108	1.31819e-15
JADE3	4.71798e-20	1.50859	1.31745e-15
AC137932.4	4.51822e-20	1.3179	1.26167e-15
SLC52A1	4.20849e-20	1.91658	1.17518e-15
PRR36	3.9284e-20	1.06213	1.09697e-15
FLJ35934	3.55067e-20	1.78554	9.91489e-16
PARPBP	3.50314e-20	1.02398	9.78216e-16
NBPF3	3.39775e-20	-1.00549	9.48787e-16
ABCB4	3.22762e-20	1.25807	9.0128e-16
MYBPC3	3.18709e-20	-1.02899	8.89962e-16
RP11-649E7.5	3.1718e-20	2.51175	8.85694e-16
COL5A2	2.54307e-20	2.71982	7.10128e-16
RDM1	2.25631e-20	1.06639	6.30053e-16
GATA6-AS1	2.05403e-20	1.87003	5.73568e-16
LAMC1	1.75217e-20	1.15172	4.89275e-16
DNAH14	1.71632e-20	1.18225	4.79265e-16
TMEM25	1.597e-20	1.13635	4.45945e-16
CIRBP-AS1	1.30772e-20	-1.41908	3.65167e-16
RASSF6	1.15719e-20	1.42194	3.23134e-16
NGEF	1.11164e-20	2.58318	3.10415e-16
DUSP15	1.10126e-20	2.24725	3.07516e-16
SAMD12	9.8237e-21	1.55811	2.74317e-16
TMEM121	9.04791e-21	1.21661	2.52654e-16
MMP14	8.42284e-21	1.44787	2.352e-16
SHISA2	8.34313e-21	1.62472	2.32974e-16
IGSF9	8.12929e-21	2.29538	2.27002e-16
DGAT2	7.40696e-21	-1.44189	2.06832e-16
PPP1R14A	7.10436e-21	1.03026	1.98382e-16
TSPAN18	6.9948e-21	1.63756	1.95323e-16
ERN2	6.22637e-21	1.34338	1.73865e-16
LINC00511	5.40472e-21	1.46321	1.50921e-16
VASN	4.56655e-21	1.0633	1.27516e-16
PARVA	4.35193e-21	1.06668	1.21523e-16
NDN	4.30871e-21	1.38102	1.20316e-16
NPFFR1	4.13435e-21	1.74388	1.15448e-16
STARD4-AS1	3.50417e-21	1.8465	9.78506e-17
CHST6	3.4096e-21	-1.58073	9.52097e-17
RP6-65G23.3	3.14377e-21	1.44212	8.77866e-17
SOD3	2.90694e-21	1.11455	8.11733e-17
IL9R	2.72157e-21	1.57306	7.59972e-17
C5orf30	2.71086e-21	1.47144	7.56982e-17
TRGV9	2.64833e-21	-1.95559	7.39521e-17
GPRASP1	2.5885e-21	1.072	7.22812e-17
FAM222A	2.41261e-21	-1.69811	6.73697e-17
BCL2L14	2.11686e-21	1.7928	5.91113e-17
CCNI2	1.7113e-21	1.19942	4.77862e-17
RP1-35C21.1	1.67645e-21	-1.83184	4.68131e-17
CCDC160	1.62445e-21	-1.00356	4.53612e-17
GATA1	1.37937e-21	2.29893	3.85174e-17
SMOX	1.16753e-21	1.04971	3.2602e-17
PLEKHG4B	1.07795e-21	-2.04889	3.01006e-17
RP11-10C24.2	8.82376e-22	-1.22774	2.46395e-17
RP11-24F11.2	8.80533e-22	1.62347	2.4588e-17
KCNK7	8.41007e-22	-1.24975	2.34843e-17
LINC01607	8.13131e-22	2.70833	2.27059e-17
EMCN	7.23968e-22	-1.00468	2.02161e-17
CTB-61M7.2	6.92753e-22	-1.83784	1.93444e-17
ZMIZ1-AS1	6.58481e-22	1.14088	1.83874e-17
DES	6.13853e-22	1.15942	1.71412e-17
EFCAB6	4.56603e-22	-1.95058	1.27502e-17
DNAH11	4.55962e-22	-1.61968	1.27323e-17
KRTCAP3	4.50279e-22	1.07991	1.25736e-17
ZWINT	4.24794e-22	1.4501	1.18619e-17
ADCY6	4.00487e-22	1.4111	1.11832e-17
SCG3	3.04734e-22	-1.0087	8.50938e-18
CASC2	2.68001e-22	-1.68062	7.48366e-18
IL37	2.4211e-22	3.10935	6.76069e-18
TINAGL1	2.25748e-22	2.50497	6.30378e-18
TMEM136	2.09341e-22	1.38329	5.84564e-18
TNFAIP6	2.08537e-22	-1.00144	5.82318e-18
KLHDC7A	1.50887e-22	2.72676	4.21337e-18
HIST1H2AM	1.3236e-22	1.59561	3.69601e-18
FGF11	1.23858e-22	1.48138	3.45861e-18
BDKRB2	1.12707e-22	-1.572	3.14722e-18
CXCL6	1.0539e-22	-1.706	2.94291e-18
RP3-467K16.4	1.01829e-22	-1.56904	2.84347e-18
AC005264.2	7.86096e-23	1.22611	2.19509e-18
RP11-196G18.24	7.44489e-23	1.16828	2.07891e-18
FAM71F2	5.57937e-23	-1.32979	1.55798e-18
RAPSN	4.50843e-23	-1.06336	1.25893e-18
CDC25A	4.16781e-23	1.64146	1.16382e-18
MTUS1	4.12576e-23	1.01137	1.15208e-18
RP11-287D1.2	3.88356e-23	1.76751	1.08445e-18
ARHGEF16	3.86909e-23	1.58924	1.0804e-18
ADGRA3	3.43955e-23	1.08716	9.60459e-19
RP11-196G18.23	2.78974e-23	1.03618	7.79007e-19
ESYT3	1.96846e-23	1.54108	5.49674e-19
CCNB1	1.94071e-23	1.80657	5.41922e-19
MEX3A	1.84474e-23	1.32915	5.15126e-19
ACY3	1.78753e-23	1.71971	4.9915e-19
TMEM150C	1.72779e-23	1.79233	4.82469e-19
SH3D21	1.5523e-23	1.26601	4.33463e-19
HS3ST2	1.27352e-23	1.39416	3.55619e-19
HID1	1.23127e-23	1.30908	3.4382e-19
EPHB4	1.18586e-23	1.07654	3.31141e-19
FOXO6	1.1555e-23	1.14783	3.22661e-19
TICRR	9.70468e-24	2.11041	2.70994e-19
MFGE8	9.70117e-24	1.07634	2.70895e-19
FAM3D	9.08429e-24	1.91376	2.5367e-19
TTC24	7.94159e-24	1.20149	2.21761e-19
USP43	7.81658e-24	-1.39774	2.1827e-19
NEBL	7.46632e-24	1.18509	2.08489e-19
TMSB15B	7.12521e-24	1.47199	1.98964e-19
PIK3C2B	6.75221e-24	1.13996	1.88549e-19
FAM150A	6.4839e-24	2.28204	1.81057e-19
SLC24A3	4.62952e-24	2.69757	1.29275e-19
EFHB	4.47792e-24	-1.17156	1.25041e-19
DCBLD2	3.75555e-24	1.75418	1.0487e-19
COL22A1	3.67618e-24	2.58493	1.02654e-19
CD244	3.54651e-24	-1.27977	9.90327e-20
CTRC	2.45991e-24	-1.68276	6.86906e-20
AMHR2	2.39602e-24	2.20018	6.69065e-20
STK33	2.21428e-24	-1.68087	6.18314e-20
MPO	1.95292e-24	1.4718	5.45334e-20
C1orf21	1.74944e-24	-1.52188	4.88512e-20
GATA2-AS1	1.73705e-24	1.96848	4.85053e-20
TOM1L1	1.38032e-24	1.29364	3.8544e-20
AC004381.6	1.0967e-24	1.29318	3.06242e-20
EXOC3L4	1.08891e-24	-1.05068	3.04068e-20
EXO1	1.0809e-24	1.40277	3.01831e-20
ZBTB20-AS2	1.01538e-24	1.72737	2.83535e-20
HIST1H4B	8.31906e-25	1.36174	2.32301e-20
SYCE3	8.2025e-25	2.06066	2.29047e-20
LINC01426	8.20021e-25	1.93506	2.28983e-20
PLA2G4F	8.17214e-25	1.20084	2.28199e-20
SLC8A1-AS1	7.43322e-25	1.72484	2.07565e-20
ERBB4	7.09641e-25	-2.37258	1.9816e-20
KIAA0319	6.86704e-25	-1.68167	1.91755e-20
RAC3	6.50818e-25	1.05763	1.81734e-20
C2orf48	6.15334e-25	1.26168	1.71826e-20
CRNN	5.93647e-25	-1.0876	1.6577e-20
SAMD14	4.33026e-25	3.71667	1.20918e-20
BPIFA1	4.0844e-25	-1.506	1.14053e-20
TRIL	3.83943e-25	2.84244	1.07212e-20
GPRC5B	3.51758e-25	1.90714	9.82248e-21
BIRC7	3.46397e-25	1.42972	9.67278e-21
ADAMTS7	3.19714e-25	2.91579	8.92771e-21
PXDN	3.05352e-25	1.26331	8.52665e-21
COL4A3	2.78211e-25	1.21576	7.76878e-21
PROC	2.45131e-25	1.05006	6.84505e-21
SYT1	2.44369e-25	1.82349	6.82376e-21
HEY2	2.04758e-25	-2.16855	5.71765e-21
CTD-2020K17.4	1.80801e-25	1.35967	5.04869e-21
SLC1A1	1.79906e-25	1.4434	5.02368e-21
ARX	1.53107e-25	-1.73778	4.27536e-21
CKM	1.47118e-25	1.31511	4.10814e-21
IFNG-AS1	1.16957e-25	1.385	3.26591e-21
AC000403.4	1.13003e-25	-1.57396	3.1555e-21
ADGRG3	1.10079e-25	-1.77727	3.07386e-21
LINC01526	1.01519e-25	-1.0997	2.8348e-21
LINC01572	9.89345e-26	2.39006	2.76265e-21
PTPRK	9.52703e-26	1.00333	2.66033e-21
LA16c-349E10.1	9.26493e-26	2.26439	2.58714e-21
GKN2	8.05988e-26	-2.2321	2.25064e-21
SPINK1	7.3757e-26	2.75818	2.05959e-21
RHPN2	6.74821e-26	-1.92588	1.88437e-21
ESPL1	6.25437e-26	1.46241	1.74647e-21
RP11-135L13.4	5.15963e-26	-1.84514	1.44077e-21
SLC22A17	3.95729e-26	2.44407	1.10503e-21
SUV39H2	3.26913e-26	1.17279	9.12873e-22
ELFN2	3.22569e-26	1.91491	9.00742e-22
RP4-794I6.4	3.05784e-26	-1.04863	8.53872e-22
REEP2	3.04977e-26	2.6703	8.51617e-22
RGS17	1.9781e-26	1.45298	5.52364e-22
N4BP3	1.60398e-26	1.10539	4.47896e-22
C2orf50	1.50879e-26	-1.30525	4.21313e-22
ARNTL2	1.4666e-26	1.32393	4.09533e-22
SMIM10L2A	1.27577e-26	2.31886	3.56245e-22
ARG2	1.22083e-26	1.75733	3.40903e-22
CYP27B1	1.2192e-26	1.74982	3.4045e-22
EML1	1.16146e-26	-1.6892	3.24326e-22
GXYLT2	1.12097e-26	2.08201	3.13019e-22
TPSG1	1.08694e-26	2.948	3.03517e-22
LKAAEAR1	7.88986e-27	-1.67354	2.20316e-22
PRDM5	7.33027e-27	-1.31137	2.0469e-22
CCDC8	6.98899e-27	-2.07414	1.95161e-22
PGLYRP1	6.58094e-27	-2.14433	1.83766e-22
TRAV36DV7	6.06676e-27	3.06317	1.69408e-22
FCRL5	5.97407e-27	2.55472	1.6682e-22
RAD54L	4.55555e-27	1.69827	1.27209e-22
CTD-2555A7.2	3.17979e-27	1.47644	8.87926e-23
SDK2	3.10381e-27	1.55512	8.66709e-23
GALNT5	3.09039e-27	1.32114	8.62962e-23
CA12	3.04295e-27	1.14962	8.49713e-23
PLA2G2D	2.95176e-27	2.65283	8.24249e-23
CLEC18A	2.08865e-27	-1.48693	5.83235e-23
CENPU	2.00448e-27	1.13718	5.59731e-23
PHKA1	1.91202e-27	2.33784	5.33913e-23
FOLR2	1.86246e-27	1.6783	5.20074e-23
ADGRF3	1.51015e-27	2.43643	4.21693e-23
CDH5	1.49045e-27	-1.19258	4.16193e-23
MYEOV	1.4813e-27	1.95815	4.1364e-23
RP11-430G17.3	1.17058e-27	1.17759	3.26871e-23
HIST1H3J	1.13655e-27	2.08473	3.17371e-23
ABI3BP	1.13426e-27	-1.04256	3.16731e-23
CFI	1.10782e-27	1.31605	3.09348e-23
RAD54B	8.56017e-28	1.06746	2.39034e-23
C10orf10	8.22882e-28	1.23554	2.29781e-23
DNAJB13	7.55913e-28	-1.00549	2.11081e-23
FUT3	6.79302e-28	2.37649	1.89688e-23
ISLR	6.71993e-28	3.3973	1.87647e-23
CRLF1	6.70017e-28	-1.2755	1.87096e-23
CCDC150	6.5582e-28	1.43744	1.83131e-23
FABP6	6.39737e-28	-1.84899	1.7864e-23
B3GALT2	6.0812e-28	1.33809	1.69811e-23
SERP2	5.68503e-28	2.11787	1.58749e-23
IRX2	4.97676e-28	1.11693	1.38971e-23
RP4-647C14.3	4.65211e-28	-1.5869	1.29906e-23
MUC16	4.5847e-28	-1.08155	1.28023e-23
MMP15	4.50705e-28	1.56432	1.25855e-23
MAOB	3.79884e-28	2.19356	1.06079e-23
COL8A1	3.64406e-28	1.6618	1.01757e-23
S100A14	3.33288e-28	1.27891	9.30673e-24
ZDHHC11	3.23968e-28	-1.00361	9.04649e-24
LINC00092	2.65007e-28	-1.14304	7.40006e-24
MAK	2.32949e-28	-1.48693	6.50486e-24
PCAT6	2.30756e-28	1.63197	6.44364e-24
LINC00482	2.25859e-28	-1.20205	6.30688e-24
C16orf59	2.19364e-28	1.44906	6.12553e-24
IQCD	1.74951e-28	-1.6634	4.88533e-24
FAXC	1.7164e-28	2.03741	4.79286e-24
TRIM29	1.58189e-28	-1.90751	4.41727e-24
MINCR	1.50381e-28	1.09005	4.19925e-24
ZNF660	1.25618e-28	1.09185	3.50777e-24
RP11-362F19.1	1.19395e-28	-1.27727	3.33398e-24
FHOD3	1.1698e-28	-1.82685	3.26654e-24
ERBB3	1.10703e-28	1.02435	3.09126e-24
GATA3-AS1	1.07708e-28	2.93018	3.00764e-24
RP3-340N1.2	1.02722e-28	1.7988	2.86841e-24
CARD10	1.00323e-28	1.69817	2.80141e-24
CMYA5	7.68692e-29	1.50553	2.14649e-24
LYPD3	7.14929e-29	1.13593	1.99637e-24
AC018816.3	7.07201e-29	1.52166	1.97479e-24
LONRF2	6.85959e-29	1.05309	1.91547e-24
HIST2H2AB	6.63588e-29	1.49386	1.853e-24
RP11-181E10.3	6.40057e-29	1.23911	1.7873e-24
CYS1	5.82386e-29	3.61162	1.62625e-24
HIST1H2BO	5.79757e-29	1.66687	1.61891e-24
VWA2	5.78288e-29	2.78074	1.61481e-24
RP11-130L8.2	4.88485e-29	-1.50852	1.36404e-24
FBXO15	4.74665e-29	-1.46225	1.32545e-24
EVA1A	4.58815e-29	1.36617	1.28119e-24
RP11-573D15.9	4.05561e-29	1.01338	1.13249e-24
PLA2G10	3.85879e-29	1.84849	1.07753e-24
C1orf226	3.50541e-29	1.82175	9.78851e-25
PHEX	3.43276e-29	2.18146	9.58564e-25
ADAMTS14	2.59258e-29	3.99022	7.23953e-25
ZNF704	2.54632e-29	1.17834	7.11034e-25
TMEM54	2.49263e-29	1.28092	6.96041e-25
MURC	2.20248e-29	-1.39922	6.15019e-25
ACSBG1	1.88154e-29	-1.84853	5.254e-25
NMU	1.82959e-29	3.31775	5.10893e-25
DNER	1.80018e-29	-2.41669	5.02683e-25
NCAPG2	1.71186e-29	1.09255	4.78021e-25
SLITRK6	1.46429e-29	-1.65029	4.08889e-25
AC002306.1	1.43244e-29	1.98954	3.99994e-25
SCD5	1.32599e-29	-1.29606	3.7027e-25
MATN2	1.08548e-29	1.47258	3.0311e-25
LRGUK	9.89099e-30	-1.77038	2.76196e-25
PRMT8	7.98228e-30	-2.24253	2.22897e-25
RP11-368I7.4	7.24157e-30	-1.53188	2.02214e-25
PGBD5	6.82427e-30	2.41425	1.90561e-25
CYP2D6	6.46305e-30	1.59945	1.80474e-25
TAL1	5.75629e-30	2.74259	1.60739e-25
CPB2	4.79982e-30	1.47642	1.3403e-25
PLA2G4C	4.77569e-30	1.33081	1.33356e-25
RP1-151F17.2	4.043e-30	1.17645	1.12897e-25
OXTR	3.02469e-30	-1.37688	8.44616e-26
TRAV20	3.01108e-30	2.73396	8.40814e-26
DCLK1	2.99312e-30	1.54577	8.35799e-26
TMEM44	2.84913e-30	1.24904	7.95592e-26
PKP3	2.67915e-30	1.17006	7.48126e-26
HIST1H1A	2.58286e-30	1.13972	7.21237e-26
OIP5	2.46773e-30	1.59488	6.89089e-26
TUSC3	1.70362e-30	-1.29227	4.75718e-26
CENPI	1.68489e-30	1.75253	4.70487e-26
CD209	1.42636e-30	1.13956	3.98298e-26
MOK	1.42214e-30	-1.26936	3.97118e-26
PLEKHG5	1.28285e-30	1.75861	3.58223e-26
LINC00864	1.21298e-30	-1.5422	3.38711e-26
COCH	1.05677e-30	3.092	2.95092e-26
ATP1A4	9.55731e-31	3.43417	2.66878e-26
ZNF750	8.22396e-31	1.75331	2.29646e-26
ZDBF2	7.90011e-31	1.07761	2.20603e-26
LHFP	7.72988e-31	1.65538	2.15849e-26
FAM124B	7.526e-31	2.27499	2.10156e-26
FAM110C	6.30509e-31	1.36228	1.76063e-26
SLC45A3	5.18681e-31	2.56863	1.44836e-26
C4BPB	4.80417e-31	2.36405	1.34152e-26
FGFR2	4.3616e-31	-1.48891	1.21793e-26
IL13	3.89991e-31	2.27537	1.08901e-26
DPP10-AS1	3.76892e-31	3.61731	1.05243e-26
CTSE	3.73863e-31	1.78542	1.04397e-26
HIST1H2BI	2.77203e-31	1.27019	7.74063e-27
NEURL1B	2.581e-31	1.49829	7.2072e-27
RAD51AP1	2.55137e-31	1.12063	7.12445e-27
RP1-187B23.1	2.48591e-31	1.31077	6.94166e-27
HOMER2	1.9803e-31	1.24392	5.52978e-27
FILIP1	1.61021e-31	-1.44953	4.49636e-27
RAD51	1.25105e-31	1.44324	3.49344e-27
F5	1.22153e-31	1.39166	3.41099e-27
FAM24B	1.21492e-31	1.14491	3.39254e-27
MEIG1	1.15839e-31	-1.22317	3.23468e-27
KISS1R	8.94802e-32	1.67856	2.49864e-27
BLK	8.04131e-32	1.41929	2.24546e-27
RP1-8B1.4	7.47243e-32	-2.03222	2.0866e-27
SSTR2	7.3586e-32	3.03752	2.05482e-27
GPR19	6.88231e-32	2.10254	1.92182e-27
SMC1B	6.57586e-32	3.83419	1.83624e-27
IQGAP3	6.20449e-32	1.55312	1.73254e-27
FAIM2	5.87501e-32	2.41185	1.64054e-27
RP11-680F8.1	5.34632e-32	3.66031	1.49291e-27
TKTL1	3.69835e-32	-3.12705	1.03273e-27
NWD1	2.97204e-32	-2.0387	8.29912e-28
TMEM47	2.73861e-32	-1.48849	7.64729e-28
C16orf46	2.38945e-32	-1.29908	6.67231e-28
RP11-983P16.4	2.26837e-32	1.51157	6.33421e-28
SLC14A1	2.15964e-32	-1.04455	6.03058e-28
TRBV28	2.05194e-32	2.00855	5.72983e-28
RP3-395M20.9	1.91343e-32	2.2521	5.34306e-28
HIST1H3I	1.91013e-32	1.4433	5.33385e-28
HIST2H4B	1.66985e-32	2.05084	4.66288e-28
C14orf132	1.57614e-32	-1.49713	4.40122e-28
POF1B	1.50661e-32	2.29547	4.20704e-28
ABCA6	1.13276e-32	1.75236	3.16311e-28
TPSAB1	9.20375e-33	2.22234	2.57006e-28
COL4A4	5.96307e-33	1.15956	1.66513e-28
AC144450.2	5.65546e-33	2.37772	1.57923e-28
SHC2	4.31281e-33	2.1846	1.20431e-28
LINC01268	4.09666e-33	1.94828	1.14395e-28
CCDC121	2.34699e-33	1.35984	6.55373e-29
FAM212A	1.92566e-33	2.41931	5.37722e-29
ZC3H12C	1.91098e-33	1.5258	5.33623e-29
C8orf34	1.87912e-33	-1.82841	5.24726e-29
MS4A1	1.7142e-33	1.62862	4.78674e-29
TRIM54	1.56558e-33	4.30397	4.37172e-29
ERC2	1.46454e-33	3.6908	4.0896e-29
TSPAN10	1.43379e-33	1.64889	4.00371e-29
C1orf210	1.26525e-33	1.39914	3.53308e-29
AFF2	1.20354e-33	2.42049	3.36076e-29
FAM69A	1.12465e-33	1.14212	3.14046e-29
MMS22L	1.02114e-33	1.04822	2.85143e-29
MMEL1	9.92096e-34	1.393	2.77033e-29
DOK5	7.21835e-34	3.03494	2.01565e-29
RLN2	6.0386e-34	1.19146	1.68622e-29
NEURL1	5.81112e-34	-1.01613	1.6227e-29
PFN2	5.46536e-34	-1.29796	1.52615e-29
XKRX	5.28269e-34	2.58481	1.47514e-29
WNT3	4.94828e-34	2.61088	1.38176e-29
LINC01624	4.3777e-34	-1.78239	1.22243e-29
ANKFN1	4.36909e-34	-1.68384	1.22002e-29
CRMP1	4.12598e-34	2.15856	1.15214e-29
FBXO43	3.90483e-34	2.2219	1.09038e-29
GRTP1	3.56725e-34	2.09647	9.9612e-30
SPTLC3	3.51961e-34	1.10376	9.82817e-30
FANCI	3.45068e-34	1.00403	9.63567e-30
NXF3	2.86992e-34	-1.24337	8.01396e-30
MACROD2	2.73244e-34	2.09209	7.63008e-30
G0S2	2.39686e-34	-1.35433	6.69298e-30
RP11-624L4.1	2.31451e-34	2.53711	6.46305e-30
RASAL2-AS1	2.31406e-34	-1.56383	6.46177e-30
LINC00158	1.68869e-34	4.01897	4.71551e-30
SHROOM1	1.48378e-34	1.37184	4.14332e-30
AC108868.5	1.23759e-34	-1.30855	3.45584e-30
ANKRD45	1.2164e-34	-1.44963	3.39668e-30
C1orf116	1.20118e-34	1.68845	3.35418e-30
AC093818.1	9.28677e-35	1.19215	2.59324e-30
RHBDL2	9.18844e-35	1.8183	2.56578e-30
CD164L2	8.43919e-35	-1.96884	2.35656e-30
KCNK13	8.09874e-35	1.02698	2.26149e-30
CTTN	7.97561e-35	1.1733	2.22711e-30
ADH1B	7.88406e-35	-1.32405	2.20154e-30
XXYLT1-AS2	6.3251e-35	3.07651	1.76622e-30
SPDEF	6.29363e-35	2.63967	1.75743e-30
VPREB3	4.9111e-35	3.10655	1.37138e-30
ROS1	4.47721e-35	1.55281	1.25022e-30
AC009502.4	4.42564e-35	-3.44178	1.23581e-30
HAL	4.30842e-35	-1.49841	1.20308e-30
SERPINB2	4.30093e-35	-2.36343	1.20099e-30
TMTC1	4.27901e-35	-1.03057	1.19487e-30
WASIR2	4.15827e-35	2.19625	1.16116e-30
LGR4	3.71715e-35	1.43082	1.03798e-30
GLS2	3.56363e-35	1.49035	9.95108e-31
MYOM2	3.44882e-35	-1.80499	9.63048e-31
RP11-309L24.4	3.36436e-35	-1.34955	9.39465e-31
KDF1	2.29014e-35	1.65553	6.39498e-31
SALL2	1.95925e-35	1.94734	5.47102e-31
ATP8A2	1.90955e-35	2.4872	5.33222e-31
MMP7	1.74144e-35	1.61521	4.8628e-31
MST1R	1.36944e-35	1.74829	3.82403e-31
KIAA2012	1.29088e-35	-2.10765	3.60466e-31
CPLX1	1.14275e-35	1.75696	3.19101e-31
C16orf71	1.11241e-35	-1.97936	3.10628e-31
HPGDS	1.00186e-35	2.30273	2.79758e-31
IL22RA2	7.5323e-36	4.50198	2.10332e-31
TK1	6.9791e-36	1.1855	1.94884e-31
RP11-1055B8.9	6.26692e-36	1.82856	1.74997e-31
KIF6	6.07844e-36	-1.46046	1.69734e-31
MTRNR2L1	5.51647e-36	-1.21462	1.54042e-31
DNA2	5.21682e-36	1.04832	1.45675e-31
SPTB	4.73095e-36	1.25139	1.32107e-31
RP11-442H21.2	4.13691e-36	1.18807	1.15519e-31
AC010287.1	4.01348e-36	1.63138	1.12073e-31
UPK3A	3.3661e-36	1.43365	9.3995e-32
EPHA10	3.24046e-36	3.4863	9.04867e-32
DUBR	2.8141e-36	-1.34431	7.85809e-32
MAP2	2.30698e-36	2.19207	6.442e-32
XXyac-YM21GA2.3	2.24717e-36	-2.32115	6.275e-32
RGS6	2.24513e-36	2.48962	6.26931e-32
FUT2	2.03913e-36	1.50633	5.69406e-32
RP11-433M22.2	2.01395e-36	-1.80245	5.62376e-32
GPC4	1.65604e-36	1.48714	4.62433e-32
IGLON5	1.47477e-36	2.0951	4.11814e-32
HIST1H2BL	1.3949e-36	2.07856	3.89513e-32
HMSD	1.22985e-36	2.62547	3.43423e-32
CD19	1.15775e-36	2.98251	3.23289e-32
RP11-84C10.2	1.11824e-36	3.18351	3.12256e-32
SPSB1	1.05288e-36	1.23432	2.94005e-32
RHBDF1	9.77938e-37	1.36324	2.73079e-32
CMA1	8.58481e-37	2.58252	2.39722e-32
EMID1	7.86131e-37	2.21455	2.19519e-32
RP11-707P17.2	7.73234e-37	-2.72378	2.15918e-32
DIRAS3	6.5789e-37	2.8704	1.83709e-32
RP11-661A12.5	6.07984e-37	-1.15293	1.69773e-32
RACGAP1	5.38182e-37	1.19045	1.50282e-32
FAM227A	5.3329e-37	-1.77941	1.48916e-32
NKD1	4.75538e-37	1.54315	1.32789e-32
MYO1B	2.97151e-37	1.08009	8.29766e-33
MEIKIN	2.95211e-37	1.74716	8.24347e-33
MMRN1	2.92173e-37	-1.21508	8.15865e-33
POLE2	2.74227e-37	1.68968	7.65751e-33
LCA5L	2.39475e-37	-1.94171	6.68711e-33
RP11-712B9.2	1.77628e-37	1.12009	4.96009e-33
FENDRR	1.63429e-37	-1.45109	4.5636e-33
STK32B	1.57155e-37	1.94026	4.38841e-33
SH3BGRL2	1.27491e-37	1.55414	3.56007e-33
CHPF	1.07386e-37	1.41494	2.99864e-33
DCDC2	1.07022e-37	-1.89168	2.98849e-33
TMPRSS4	1.05191e-37	1.29673	2.93736e-33
NLGN4Y	1.04792e-37	2.4209	2.92622e-33
GABRP	9.60744e-38	3.34666	2.68278e-33
GSG2	9.32784e-38	2.38941	2.60471e-33
ABCA13	9.0207e-38	-1.6668	2.51894e-33
STIL	7.74424e-38	1.19117	2.1625e-33
LRRN3	6.93045e-38	1.68322	1.93526e-33
TMEM51-AS1	5.86462e-38	1.97729	1.63764e-33
MMP24	5.50641e-38	2.59363	1.53761e-33
CFAP54	5.29254e-38	-1.54535	1.47789e-33
PAX9	5.12725e-38	-1.92399	1.43173e-33
PLK4	5.06116e-38	1.39131	1.41328e-33
IL18RAP	4.31515e-38	-1.18491	1.20496e-33
NRN1	3.45819e-38	1.69823	9.65664e-34
MIR503HG	3.14994e-38	2.51113	8.7959e-34
KCNMB2-AS1	3.01249e-38	2.72193	8.41208e-34
HIST1H3C	2.87058e-38	1.68326	8.0158e-34
RP11-219A15.1	2.64837e-38	1.04181	7.39531e-34
PROM2	2.53061e-38	2.14795	7.06648e-34
P2RX5	2.49695e-38	1.62456	6.97248e-34
CD177	2.06689e-38	1.66314	5.77157e-34
HOXC9	2.03764e-38	4.82189	5.68991e-34
E2F7	1.75596e-38	1.71664	4.90334e-34
SULT2B1	1.72567e-38	-1.4328	4.81877e-34
KLK11	1.60872e-38	-1.78139	4.4922e-34
IGKC	1.56226e-38	1.38336	4.36246e-34
SLC25A34	1.38769e-38	-1.07081	3.875e-34
STOX1	1.34832e-38	-1.56118	3.76506e-34
TMPRSS3	1.04435e-38	1.5296	2.91625e-34
NKILA	1.00255e-38	2.18068	2.79951e-34
BLM	8.67716e-39	1.01746	2.42301e-34
SRD5A2	8.28074e-39	-2.69528	2.31231e-34
TGFB1I1	7.65815e-39	1.25426	2.13846e-34
RP11-10N16.2	6.66909e-39	-3.30435	1.86228e-34
ARHGAP39	5.94814e-39	-1.32522	1.66096e-34
EYA1	5.28415e-39	-2.83214	1.47555e-34
AP001059.7	5.13018e-39	1.71558	1.43255e-34
MAP7D2	4.88946e-39	3.238	1.36533e-34
LINC01330	4.6858e-39	4.26653	1.30846e-34
TMEM105	4.53828e-39	2.83242	1.26727e-34
HOXB3	4.46409e-39	1.28925	1.24655e-34
SLC35F3	4.4113e-39	1.52862	1.23181e-34
RP11-196G11.6	3.88183e-39	-1.16411	1.08396e-34
RP11-161M6.2	3.70698e-39	1.26782	1.03514e-34
PRDM16	3.6922e-39	2.02886	1.03101e-34
RP11-286H15.1	3.37905e-39	-3.18172	9.43566e-35
BRDT	2.81215e-39	2.04041	7.85265e-35
FGGY	2.62176e-39	1.00969	7.321e-35
WNT5A-AS1	2.5059e-39	3.11188	6.99748e-35
GSTA1	2.25287e-39	-1.4694	6.29092e-35
TNFRSF19	2.22416e-39	-1.457	6.21074e-35
KCNE1B	2.04079e-39	-2.43957	5.6987e-35
SMIM24	1.77051e-39	3.63748	4.94397e-35
CDH23	1.76046e-39	-1.18637	4.9159e-35
PRAME	1.74502e-39	6.15547	4.87279e-35
LTBP2	1.20342e-39	1.16612	3.36043e-35
CYTL1	1.157e-39	1.66855	3.2308e-35
SPINK13	1.07057e-39	5.72601	2.98947e-35
GNG8	9.32029e-40	4.24114	2.6026e-35
RP11-44F21.5	8.98812e-40	1.92605	2.50984e-35
CFAP161	8.85519e-40	-2.34842	2.47272e-35
ACE2	8.36264e-40	4.25128	2.33518e-35
IL12RB2	7.21177e-40	1.18518	2.01382e-35
ERICH5	6.86122e-40	-2.69525	1.91593e-35
ZNF512B	6.35061e-40	1.08897	1.77334e-35
TRAV8-2	5.76515e-40	1.23977	1.60986e-35
ZBTB46	5.68769e-40	1.34224	1.58823e-35
TNKS1BP1	5.59369e-40	1.04194	1.56198e-35
RP11-298O21.2	5.48253e-40	5.12401	1.53094e-35
ABCB1	5.17853e-40	-1.05859	1.44605e-35
LINC00632	4.58982e-40	-1.51477	1.28166e-35
CRYBB1	4.45483e-40	1.96863	1.24397e-35
PRSS33	4.36035e-40	-3.65649	1.21758e-35
TET1	4.22222e-40	1.22765	1.17901e-35
VANGL2	3.94837e-40	2.20845	1.10254e-35
KIF12	3.82528e-40	3.01304	1.06817e-35
PRSS57	3.6192e-40	-1.91235	1.01063e-35
TMEM132A	3.55156e-40	2.17488	9.91737e-36
PPFIA4	3.2896e-40	3.11451	9.18588e-36
LRRC49	3.05561e-40	-1.5087	8.53248e-36
BEND5	2.65841e-40	1.74778	7.42334e-36
AURKA	2.24663e-40	1.12115	6.27349e-36
GYLTL1B	1.91186e-40	1.26162	5.33868e-36
EVC	1.85613e-40	2.10539	5.18306e-36
GPSM1	1.7145e-40	1.35263	4.78756e-36
CYR61	1.62642e-40	-1.03393	4.54162e-36
LINC01358	1.51325e-40	2.51724	4.22559e-36
RASSF9	1.30818e-40	-2.17746	3.65295e-36
HIST1H2AB	1.25478e-40	2.12024	3.50384e-36
RIMKLA	7.63198e-41	1.92897	2.13115e-36
NOS1AP	6.78731e-41	1.62497	1.89529e-36
HIST1H3F	5.66786e-41	1.99844	1.58269e-36
IFI44L	5.34079e-41	1.7277	1.49136e-36
ENPP3	4.70826e-41	2.50865	1.31473e-36
BFSP2	4.09125e-41	3.04295	1.14244e-36
LRRC31	3.98643e-41	3.73522	1.11317e-36
CCSER1	3.78783e-41	1.6919	1.05771e-36
RP11-128M1.1	3.57122e-41	-1.98846	9.97229e-37
KLHL32	2.95079e-41	-2.45437	8.23977e-37
RP11-567J20.3	2.51571e-41	-1.12022	7.02487e-37
HS3ST6	2.46777e-41	-2.38413	6.891e-37
THAP10	1.66846e-41	-1.16527	4.65902e-37
PPIL6	1.52136e-41	-1.74465	4.24825e-37
TRAV17	1.39476e-41	1.62098	3.89473e-37
CYP3A5	1.36023e-41	1.38099	3.79829e-37
CDC6	1.15606e-41	1.45574	3.22819e-37
KCNH3	1.0956e-41	-1.17284	3.05935e-37
WDHD1	8.23731e-42	1.21164	2.30019e-37
LINC00982	6.37046e-42	2.01119	1.77889e-37
MRO	5.86899e-42	4.13051	1.63886e-37
KIF18A	4.9994e-42	1.30725	1.39603e-37
MNS1	4.83884e-42	-1.4874	1.3512e-37
SLC44A5	4.26113e-42	3.37894	1.18988e-37
RIBC1	3.69601e-42	-1.47623	1.03207e-37
RP11-16E12.2	3.68856e-42	2.33723	1.02999e-37
CUL9	3.20841e-42	1.22646	8.95916e-38
MAPK12	2.61205e-42	1.78497	7.29388e-38
ARHGEF39	2.13164e-42	1.21839	5.95238e-38
RANBP17	1.89767e-42	1.62109	5.29906e-38
NEK10	1.69901e-42	-1.22951	4.7443e-38
HSF4	1.6086e-42	1.46489	4.49184e-38
TNC	1.54113e-42	1.4403	4.30345e-38
SYT7	1.44328e-42	4.13732	4.03021e-38
AIM2	1.32933e-42	1.00428	3.71203e-38
FAM124A	1.19156e-42	1.90668	3.32732e-38
PACSIN3	1.00619e-42	1.68029	2.80969e-38
MFAP5	8.23666e-43	-1.60257	2.30001e-38
EMILIN1	8.0445e-43	1.95393	2.24635e-38
ERCC6L	7.79316e-43	2.82163	2.17616e-38
NRSN2	7.6235e-43	1.42814	2.12879e-38
CFLAR-AS1	7.4954e-43	1.1557	2.09301e-38
BBOX1-AS1	7.47852e-43	4.78652	2.0883e-38
ALS2CR12	7.39656e-43	-1.35433	2.06542e-38
DPF3	7.21275e-43	1.11176	2.01409e-38
AC116366.5	6.9628e-43	-1.37248	1.94429e-38
DSCC1	6.28153e-43	1.80406	1.75405e-38
ASPHD1	5.91915e-43	2.80762	1.65286e-38
CIART	5.84471e-43	1.49744	1.63208e-38
C22orf23	5.32403e-43	-1.5009	1.48668e-38
RP11-277P12.10	4.68839e-43	5.62565	1.30919e-38
C4orf47	3.83411e-43	-1.75969	1.07064e-38
SLC16A10	3.81247e-43	1.49185	1.06459e-38
RNASE3	3.06432e-43	3.94123	8.5568e-39
CNTNAP3B	2.91209e-43	-2.0178	8.13173e-39
LINC01133	2.7996e-43	3.44698	7.8176e-39
GINS1	2.60261e-43	1.73539	7.26752e-39
CFAP45	2.0612e-43	-1.34982	5.75568e-39
SLCO5A1	2.00612e-43	2.39418	5.60189e-39
SAPCD2	1.6504e-43	1.22139	4.60857e-39
FOXB1	1.64548e-43	3.58727	4.59483e-39
EPHA4	1.51968e-43	1.63673	4.24354e-39
MAML1	1.50567e-43	1.08345	4.20444e-39
RCAN2	1.44562e-43	1.06662	4.03676e-39
LRRC18	1.33233e-43	-2.66344	3.72039e-39
PMCH	9.84704e-44	4.80057	2.74969e-39
PIH1D2	9.03479e-44	-2.16015	2.52287e-39
DYDC1	8.94603e-44	-3.4171	2.49809e-39
SV2A	7.28256e-44	1.47408	2.03358e-39
DGCR5	6.89937e-44	5.03148	1.92658e-39
PRRT4	6.13918e-44	-1.62539	1.71431e-39
KRT7	5.24275e-44	1.03029	1.46398e-39
RSPH14	4.86834e-44	-1.70403	1.35943e-39
FAM64A	4.72393e-44	1.90523	1.31911e-39
ABCC6	4.57529e-44	1.19241	1.2776e-39
SP5	4.5544e-44	5.31456	1.27177e-39
TMEM255A	4.44626e-44	-1.22042	1.24157e-39
RP11-1299A16.3	4.3221e-44	1.80676	1.2069e-39
CES3	4.21302e-44	1.69939	1.17644e-39
HIST1H4I	4.12641e-44	1.95336	1.15226e-39
PEG3	4.07427e-44	-2.50357	1.1377e-39
CDH24	3.61048e-44	1.97102	1.00819e-39
DZIP1	3.22252e-44	-1.89891	8.99856e-40
MAPK11	2.86957e-44	1.51763	8.01299e-40
CXCL10	2.85789e-44	1.11119	7.98038e-40
SPRR2A	2.07782e-44	-1.34403	5.8021e-40
PTGIR	2.06501e-44	1.29311	5.76633e-40
MNX1	1.93187e-44	2.71068	5.39455e-40
RSAD2	1.5413e-44	1.64232	4.30394e-40
IGHA2	1.43701e-44	1.89817	4.01271e-40
ANKRD33B	1.32749e-44	1.42296	3.70688e-40
C1QTNF6	1.25272e-44	1.10395	3.49811e-40
MSMB	1.17533e-44	-3.38805	3.28199e-40
PRSS16	1.13561e-44	1.27768	3.17108e-40
POLQ	1.12988e-44	1.55627	3.15508e-40
FBLN2	1.08695e-44	2.50482	3.03521e-40
PLEKHG4	1.06303e-44	1.36318	2.96841e-40
CDC25C	9.85007e-45	2.51983	2.75053e-40
MEFV	9.78798e-45	-1.45986	2.73319e-40
SCG5	9.05949e-45	4.08276	2.52977e-40
HIST1H2BM	8.12984e-45	2.6558	2.27018e-40
ASF1B	5.62597e-45	1.01841	1.57099e-40
EFEMP1	5.29966e-45	-1.27436	1.47988e-40
APOBEC4	3.31814e-45	-2.77929	9.26558e-41
RP11-57H12.3	3.23517e-45	-3.06246	9.03389e-41
PPP1R32	2.53405e-45	-1.32845	7.07607e-41
PLEKHG1	2.4843e-45	1.08698	6.93715e-41
XDH	2.39947e-45	3.88111	6.70027e-41
SUSD2	2.12952e-45	1.17592	5.94647e-41
PKMYT1	2.02223e-45	1.29565	5.64688e-41
PZP	1.90345e-45	-1.25771	5.31518e-41
ELSPBP1	1.1104e-45	9.14288	3.10069e-41
SLIT1	1.05147e-45	-1.44158	2.93612e-41
RNF43	9.67484e-46	1.07546	2.7016e-41
SEC14L2	9.08146e-46	1.2737	2.53591e-41
KCNS3	8.85894e-46	1.96609	2.47377e-41
TLR10	8.52263e-46	1.60871	2.37986e-41
FOXP2	7.85466e-46	-1.87256	2.19334e-41
BMP2K	7.74057e-46	1.03101	2.16148e-41
TMEM100	5.35482e-46	-2.22373	1.49528e-41
AC005253.2	4.67384e-46	1.17207	1.30512e-41
LRRC73	4.63812e-46	-1.6738	1.29515e-41
CHI3L2	4.19958e-46	1.00866	1.17269e-41
ADM2	3.26264e-46	1.2172	9.1106e-42
BGN	2.63568e-46	1.9933	7.35988e-42
NTSR1	2.48586e-46	1.07595	6.94151e-42
FAM229B	2.08679e-46	-1.38385	5.82714e-42
PXN	1.88853e-46	-1.00715	5.27354e-42
ZNF618	1.66466e-46	1.04007	4.64839e-42
LINC01612	1.38821e-46	3.19481	3.87645e-42
CFAP70	1.30777e-46	-1.4386	3.65183e-42
TRAV4	1.21444e-46	2.0626	3.39121e-42
NEK2	1.10538e-46	2.05571	3.08666e-42
TM4SF4	1.02209e-46	5.45249	2.85409e-42
MDK	9.51649e-47	1.86721	2.65738e-42
PVRL4	8.6288e-47	1.01288	2.40951e-42
DTL	8.14991e-47	1.26858	2.27578e-42
PPP1R3C	6.45748e-47	3.91636	1.80319e-42
KRT1	5.90666e-47	5.04905	1.64938e-42
SRXN1	5.84272e-47	-1.10999	1.63152e-42
L3MBTL4-AS1	5.77494e-47	2.20041	1.61259e-42
EFCAB10	5.72397e-47	-2.28905	1.59836e-42
KRT86	5.24815e-47	1.81074	1.46549e-42
RPH3A	5.04869e-47	-3.84434	1.4098e-42
KLRC3	4.53229e-47	-2.24482	1.2656e-42
FBXO5	4.14417e-47	1.31007	1.15722e-42
BEAN1	4.02651e-47	3.91786	1.12436e-42
C8A	1.85901e-47	-1.84517	5.19109e-43
CALB2	1.78769e-47	1.70321	4.99194e-43
NETO2	1.62394e-47	1.13684	4.53468e-43
COL16A1	1.59385e-47	2.25921	4.45068e-43
PDIK1L	1.56225e-47	1.05025	4.36242e-43
KIF14	9.92512e-48	1.94749	2.77149e-43
TBX3	9.89644e-48	2.12534	2.76348e-43
DEPTOR	8.21323e-48	1.80753	2.29346e-43
PARD6G	7.72239e-48	1.18007	2.1564e-43
CSF3R	7.548e-48	-1.18181	2.1077e-43
CCDC33	7.24042e-48	-2.37731	2.02182e-43
RP4-666F24.3	6.98341e-48	-1.58357	1.95005e-43
RP11-347J14.7	6.24949e-48	-3.87585	1.74511e-43
VSTM2B	5.65801e-48	-3.68758	1.57994e-43
PTPRF	5.32583e-48	1.17767	1.48719e-43
RP11-358B23.5	5.26004e-48	2.52393	1.46881e-43
PLK1	4.66525e-48	1.54821	1.30272e-43
RP11-768G7.2	4.3604e-48	-1.81021	1.2176e-43
C2orf73	4.05523e-48	-4.13422	1.13238e-43
ARMC2	3.94155e-48	-1.08284	1.10064e-43
PPP1R3G	3.45235e-48	1.81673	9.64033e-44
GRM7-AS1	3.34369e-48	3.1668	9.33691e-44
LINC00539	2.92322e-48	1.29352	8.1628e-44
PON3	2.77025e-48	1.94038	7.73565e-44
RP11-263K19.4	2.00309e-48	-2.22506	5.59344e-44
PIK3CD-AS2	1.93105e-48	1.55156	5.39225e-44
RP11-572O17.1	1.40034e-48	1.58109	3.91031e-44
RAB44	8.08536e-49	2.2689	2.25776e-44
TCTN2	5.65364e-49	-1.08412	1.57872e-44
TRAV13-2	5.46304e-49	1.8142	1.5255e-44
RP11-798M19.6	4.40825e-49	1.07807	1.23096e-44
LGALS4	4.28579e-49	2.5428	1.19676e-44
KIF20A	3.75581e-49	2.09222	1.04877e-44
PLEKHA6	3.71134e-49	1.90864	1.03636e-44
RP11-1060J15.4	3.36272e-49	2.14339	9.39005e-45
FAM213B	3.30075e-49	1.02084	9.217e-45
CROCC2	3.20046e-49	-2.1838	8.93697e-45
MREG	3.08512e-49	1.07394	8.61488e-45
LINC00211	2.96541e-49	-1.89312	8.2806e-45
PRELID2	2.54538e-49	1.62373	7.10772e-45
IL26	2.23574e-49	3.01753	6.24308e-45
HIST1H4J	2.0578e-49	1.29978	5.74621e-45
C6orf223	1.70825e-49	1.71362	4.77011e-45
DEPDC1	1.37219e-49	1.82252	3.83171e-45
EGFR	1.25532e-49	1.80873	3.50535e-45
FAM189A2	1.02755e-49	-1.84712	2.86934e-45
CFAP65	8.4057e-50	-1.8207	2.34721e-45
CCDC74B	8.19858e-50	-1.59073	2.28937e-45
FNBP1L	7.16293e-50	1.18885	2.00018e-45
TMPO-AS1	7.13656e-50	1.13916	1.99281e-45
KHDRBS3	6.07964e-50	1.70512	1.69768e-45
GCAT	5.96462e-50	1.84249	1.66556e-45
RP11-44D19.1	4.94617e-50	-2.65955	1.38117e-45
ATAD3C	4.23603e-50	1.58881	1.18287e-45
IGF1	3.96665e-50	-1.14899	1.10765e-45
TCTE1	3.13247e-50	-2.60204	8.74711e-46
HIST1H4E	3.02778e-50	1.06746	8.45478e-46
HIST1H4A	3.02657e-50	1.07707	8.45138e-46
PTPN13	2.95413e-50	1.00374	8.24911e-46
FAAH2	2.75674e-50	1.78617	7.69791e-46
FGF10	2.54147e-50	-2.0866	7.09681e-46
RTN4RL2	1.94756e-50	1.20479	5.43837e-46
LUM	1.89784e-50	1.34132	5.29953e-46
C11orf16	1.84888e-50	-2.17245	5.16282e-46
RHBDL1	1.21851e-50	1.56445	3.40258e-46
NFATC4	7.93384e-51	1.85734	2.21545e-46
STRIP2	6.80731e-51	1.854	1.90087e-46
RP11-395E19.6	6.26864e-51	-2.88434	1.75045e-46
DNAJB4	5.96456e-51	1.32336	1.66554e-46
FAM184A	5.93774e-51	1.02413	1.65805e-46
HIST1H2AI	3.82622e-51	2.09206	1.06843e-46
LRRC43	3.49964e-51	-2.79788	9.7724e-47
LGSN	2.68323e-51	2.42559	7.49266e-47
RAB36	1.7176e-51	-1.65799	4.79622e-47
C5orf38	1.59766e-51	1.80052	4.4613e-47
ABCC4	1.28706e-51	1.40587	3.594e-47
TTC25	1.19393e-51	-1.56798	3.33394e-47
RP4-742C19.13	1.07441e-51	1.40813	3.00018e-47
AP001059.6	9.63245e-52	1.77396	2.68977e-47
AC064834.3	9.11778e-52	-1.09	2.54605e-47
IGF1R	8.98369e-52	-1.24478	2.50861e-47
CA4	8.81413e-52	-2.13486	2.46126e-47
PLAC9	6.85841e-52	-1.56356	1.91514e-47
CAPN8	6.26069e-52	1.46584	1.74824e-47
GAS2L2	5.36758e-52	-2.34396	1.49884e-47
CHEK1	5.24626e-52	1.31386	1.46496e-47
AFAP1L2	5.17134e-52	1.91197	1.44404e-47
DLGAP3	4.85792e-52	1.04769	1.35653e-47
AC026471.6	3.09099e-52	3.38151	8.63127e-48
MMP11	3.02765e-52	2.10118	8.45442e-48
GIPC2	2.97515e-52	-3.03275	8.30782e-48
SLC9A7	2.51963e-52	1.23236	7.0358e-48
SLC26A9	2.47856e-52	1.83672	6.92114e-48
SPATA17	2.42442e-52	-2.44824	6.76995e-48
HNF1B	1.94837e-52	2.36845	5.44064e-48
CYP2A7	1.5893e-52	-5.12573	4.43797e-48
RAB17	9.62322e-53	1.46542	2.68719e-48
A4GNT	8.36855e-53	-1.86915	2.33683e-48
TNFRSF8	5.96471e-53	1.32104	1.66559e-48
GSTA2	5.02623e-53	-2.43946	1.40353e-48
RP11-222K16.2	3.95976e-53	-1.35847	1.10572e-48
SLC6A20	3.76568e-53	2.58737	1.05153e-48
AC079767.4	2.53385e-53	1.71875	7.07553e-49
HOXB-AS1	1.86557e-53	1.12532	5.20941e-49
DOK4	1.52711e-53	1.09297	4.26429e-49
CSF3	1.46425e-53	-2.60712	4.08878e-49
MCM10	1.37393e-53	1.46131	3.83656e-49
AP003774.1	1.29673e-53	1.36375	3.621e-49
LINC00954	1.24362e-53	1.39153	3.47269e-49
NEIL3	1.13342e-53	1.52163	3.16497e-49
SKA1	1.01183e-53	1.84529	2.82544e-49
GOLT1A	9.74607e-54	1.74246	2.72149e-49
CCNF	7.04279e-54	1.3115	1.96663e-49
COL17A1	6.87593e-54	2.22871	1.92003e-49
PLLP	6.07637e-54	1.25194	1.69677e-49
SERPINH1	5.694e-54	1.48993	1.58999e-49
ZDHHC1	5.61097e-54	-1.32962	1.56681e-49
UBD	5.35823e-54	2.07461	1.49623e-49
FANK1	4.67738e-54	1.78959	1.30611e-49
ECT2L	4.52295e-54	-1.8756	1.26299e-49
TMEM98	4.40479e-54	1.26198	1.22999e-49
SPATA4	3.14541e-54	-1.94098	8.78324e-50
C19orf81	3.12478e-54	2.71664	8.72564e-50
SRPX2	2.26385e-54	3.5472	6.32158e-50
SLC6A4	2.22336e-54	-2.63288	6.20852e-50
GSTA3	2.12823e-54	-4.36413	5.94287e-50
TSPAN2	1.92744e-54	-1.4337	5.38218e-50
RP11-736N17.11	1.32268e-54	-2.4666	3.69345e-50
LINC00900	1.01589e-54	1.73208	2.83676e-50
EVPL	7.95613e-55	1.51396	2.22167e-50
PLOD2	7.7594e-55	1.68177	2.16673e-50
LINC00656	7.68242e-55	-1.61838	2.14524e-50
BMP3	5.94931e-55	1.91422	1.66129e-50
SH3RF2	5.6669e-55	2.54251	1.58243e-50
CACNG6	4.24343e-55	-2.54154	1.18494e-50
MCAM	4.19602e-55	1.39155	1.1717e-50
CYP2A6	3.67994e-55	-5.65992	1.02759e-50
FERMT1	2.97359e-55	2.70044	8.30344e-51
KIAA0125	2.95142e-55	2.37122	8.24155e-51
KLK10	2.45331e-55	-2.62441	6.85061e-51
CADPS	2.44165e-55	3.71264	6.81806e-51
AK7	2.00233e-55	-2.15769	5.59131e-51
CDCA5	1.99975e-55	1.60336	5.58411e-51
AK8	1.96407e-55	-1.51128	5.48446e-51
RP1-244F24.1	1.53624e-55	1.67328	4.2898e-51
AP003774.6	1.50632e-55	1.24707	4.20624e-51
FRMPD2	1.46684e-55	-2.01424	4.09601e-51
LYPD2	1.26357e-55	-2.85648	3.52839e-51
GNG4	1.23422e-55	4.87884	3.44644e-51
RP11-16K12.1	1.18101e-55	2.26973	3.29784e-51
CCDC13	8.90499e-56	-1.01616	2.48663e-51
PLEKHS1	8.76948e-56	-1.84827	2.44879e-51
MPDZ	7.98415e-56	-1.86213	2.22949e-51
GINS2	6.28186e-56	1.47525	1.75415e-51
PPP1R36	6.06874e-56	-1.19746	1.69463e-51
PBX1	5.45508e-56	2.06704	1.52328e-51
RP4-539M6.14	4.63015e-56	-1.91577	1.29292e-51
IGF2	4.42275e-56	2.66729	1.23501e-51
RP1-239B22.5	3.68207e-56	-1.44574	1.02818e-51
SHCBP1	3.34069e-56	1.40126	9.32854e-52
TTLL9	2.72362e-56	-1.49946	7.60544e-52
GLIS3	2.64447e-56	-1.45556	7.38442e-52
ZNF229	2.61693e-56	-1.39081	7.30751e-52
LINC01436	2.509e-56	2.90711	7.00614e-52
CMBL	2.24646e-56	1.86498	6.27301e-52
MEST	2.06079e-56	1.65519	5.75456e-52
DENND2C	1.93637e-56	-1.25859	5.40713e-52
PKIA	1.18841e-56	2.0193	3.31852e-52
CFAP69	1.01803e-56	-2.59364	2.84275e-52
TEKT4	8.55784e-57	-1.92066	2.38969e-52
PCSK9	8.36253e-57	-1.45315	2.33515e-52
SCN2A	8.27361e-57	7.42461	2.31032e-52
KCNJ16	6.56162e-57	-4.97318	1.83227e-52
VSIG1	6.56074e-57	2.33805	1.83202e-52
FBXL2	6.10039e-57	-1.05567	1.70347e-52
ATF7IP2	5.6989e-57	1.00355	1.59136e-52
CLDN8	5.65985e-57	-2.20604	1.58046e-52
STK32A	4.84666e-57	3.5633	1.35338e-52
STON2	2.79731e-57	1.28938	7.81121e-53
KIAA0226L	2.59185e-57	-1.37147	7.23747e-53
PDZK1IP1	2.34257e-57	2.39742	6.54138e-53
AKAP2	1.8855e-57	1.62563	5.26508e-53
CTA-384D8.35	1.59552e-57	1.3923	4.45532e-53
RAMP3	1.18178e-57	-1.41117	3.30001e-53
ELAVL4	7.55336e-58	1.39848	2.1092e-53
ENO4	7.3926e-58	-3.83459	2.06431e-53
RP11-742B18.1	7.33154e-58	4.79357	2.04726e-53
SKA3	5.57077e-58	2.11287	1.55558e-53
WFDC6	4.54425e-58	-3.0679	1.26894e-53
KIF23	2.82769e-58	1.9642	7.89604e-54
IQUB	2.41991e-58	-2.60141	6.75735e-54
TNFRSF13C	2.39719e-58	2.23508	6.69392e-54
COL5A1	2.15385e-58	2.01199	6.01442e-54
USP51	1.84868e-58	1.504	5.16225e-54
LRRC74B	1.66519e-58	-2.01046	4.64988e-54
PODXL2	1.35776e-58	1.82647	3.7914e-54
CDCA8	9.47349e-59	1.82873	2.64538e-54
CH17-360D5.2	8.93509e-59	-2.61627	2.49504e-54
FAM166B	8.3696e-59	-1.12864	2.33713e-54
RP11-356I2.1	7.84766e-59	3.75336	2.19138e-54
PRSS12	6.89494e-59	-1.83494	1.92534e-54
CDT1	6.63555e-59	1.27937	1.85291e-54
NFAM1	6.22231e-59	-1.13094	1.73752e-54
CKAP2	5.75578e-59	1.05445	1.60725e-54
GPRC5C	5.47926e-59	1.45349	1.53003e-54
NR5A2	4.81384e-59	2.92604	1.34422e-54
HIST1H3B	3.78922e-59	2.01731	1.0581e-54
CDC45	3.33217e-59	1.83248	9.30474e-55
C1orf54	3.20141e-59	1.26534	8.93961e-55
RP11-122M14.1	2.90086e-59	-2.73497	8.10036e-55
KIF18B	2.56178e-59	2.22167	7.15352e-55
RP11-424M24.5	2.33289e-59	-3.22445	6.51436e-55
COL27A1	2.12044e-59	1.73863	5.9211e-55
B9D1	1.68838e-59	-1.35916	4.71464e-55
CRISP2	1.63309e-59	-3.17944	4.56025e-55
RP11-556E13.1	1.31987e-59	3.94209	3.68561e-55
EVC2	1.31219e-59	1.57964	3.66415e-55
LRRC75B	1.30067e-59	2.25092	3.63199e-55
RP11-793H13.3	1.14831e-59	1.82924	3.20654e-55
LRRC34	1.13878e-59	-1.42351	3.17992e-55
TTK	1.02905e-59	1.93634	2.87352e-55
ARMC4	9.80519e-60	-2.26877	2.738e-55
C1orf167	8.68685e-60	2.25721	2.42572e-55
ZNF578	6.87903e-60	-1.0669	1.9209e-55
GGT5	6.14091e-60	1.49031	1.71479e-55
HIST1H2AK	6.0369e-60	1.72084	1.68574e-55
NCS1	5.06473e-60	1.52324	1.41427e-55
OBSL1	4.57904e-60	2.14255	1.27865e-55
LCT	2.96489e-60	3.68549	8.27917e-56
BMPR1B	1.77825e-60	-2.85376	4.96559e-56
TNFRSF13B	1.76576e-60	2.10184	4.9307e-56
CLSPN	1.25637e-60	1.12396	3.50828e-56
ATF5	1.17851e-60	1.26947	3.29086e-56
RP11-121A8.1	8.45506e-61	-1.72041	2.36099e-56
CDCA2	4.43206e-61	1.95715	1.23761e-56
PTCH1	3.6959e-61	-1.7947	1.03204e-56
TMEM26	3.60685e-61	3.02764	1.00718e-56
C10orf107	3.10402e-61	-2.91478	8.66767e-57
KCTD14	2.82084e-61	2.30042	7.87693e-57
RIIAD1	2.33826e-61	-1.86729	6.52935e-57
LRRC2	1.62594e-61	3.07816	4.54028e-57
NEURL3	1.17295e-61	2.69318	3.27534e-57
C6orf222	1.16969e-61	6.06484	3.26624e-57
MBOAT1	1.10353e-61	1.32621	3.08149e-57
NCR3LG1	8.11387e-62	-1.34067	2.26572e-57
PLAU	7.26568e-62	1.46292	2.02887e-57
TANC1	7.17596e-62	2.41337	2.00381e-57
TEKT3	6.46671e-62	-1.9966	1.80576e-57
RP6-91H8.3	5.43641e-62	1.07334	1.51806e-57
PCSK5	4.46211e-62	-1.58694	1.246e-57
GCNT3	3.45333e-62	3.53616	9.64309e-58
SIGLEC6	3.12654e-62	3.9403	8.73054e-58
B4GALT1-AS1	1.92431e-62	-1.38703	5.37343e-58
TROAP	1.59926e-62	1.89669	4.46577e-58
RAPGEF5	1.13912e-62	1.0284	3.18089e-58
RP11-245D16.4	1.12081e-62	1.46721	3.12975e-58
NCMAP	1.09099e-62	2.785	3.04648e-58
PBK	9.47528e-63	2.02158	2.64588e-58
RP11-283G6.6	7.0099e-63	-1.54677	1.95744e-58
MIR155HG	6.34954e-63	1.02597	1.77305e-58
OPRK1	5.37613e-63	-2.68307	1.50123e-58
CCDC60	4.06763e-63	-3.24195	1.13584e-58
TMPRSS2	2.67921e-63	1.60311	7.48143e-59
AQP7	2.56005e-63	-1.10582	7.14869e-59
HRASLS	2.27968e-63	-1.82583	6.36578e-59
IGHG2	1.49273e-63	1.80614	4.16831e-59
CTD-2003C8.2	1.15999e-63	-2.02542	3.23916e-59
RP4-728D4.2	8.66839e-64	-1.12268	2.42056e-59
STAP1	8.12348e-64	1.99485	2.2684e-59
DOC2A	7.71034e-64	-1.60839	2.15303e-59
SPAG8	7.38783e-64	-1.35032	2.06298e-59
CYP7B1	6.2414e-64	3.57254	1.74285e-59
RP11-390F4.3	5.14461e-64	2.75624	1.43658e-59
HSD17B13	5.07681e-64	-2.87404	1.41765e-59
WDR63	3.80257e-64	-1.78121	1.06183e-59
H1F0	3.49258e-64	1.25343	9.75267e-60
NME5	3.48384e-64	-2.64734	9.72827e-60
HIST1H2AL	2.65943e-64	1.62224	7.42619e-60
HBM	2.64e-64	-1.25286	7.37194e-60
NALCN-AS1	2.1199e-64	-2.30722	5.91962e-60
CTTNBP2	1.95477e-64	3.16366	5.45849e-60
NTRK3	1.25359e-64	-1.19644	3.50052e-60
CLU	1.0209e-64	1.55539	2.85077e-60
SMYD3	9.85013e-65	1.00688	2.75055e-60
PALD1	5.38918e-65	1.11746	1.50487e-60
ADRB3	3.2666e-65	2.93344	9.12164e-61
E2F8	3.04394e-65	2.11636	8.49988e-61
Z82214.3	2.13922e-65	-4.06684	5.97355e-61
PDPN	1.23809e-65	2.70376	3.45723e-61
MYBPHL	1.07515e-65	3.9819	3.00225e-61
TBC1D4	1.07466e-65	1.82409	3.00087e-61
ENPP5	1.0268e-65	-1.50232	2.86724e-61
ACOX2	1.01823e-65	1.75363	2.84331e-61
RP11-386I14.4	9.81421e-66	1.00736	2.74052e-61
PRTN3	7.60502e-66	7.28357	2.12363e-61
FZD2	6.42291e-66	1.07987	1.79353e-61
CFAP58	6.27135e-66	-2.89715	1.75121e-61
SLC22A4	5.67602e-66	-1.15888	1.58497e-61
DNAH5	5.2829e-66	-2.37399	1.4752e-61
C7orf57	4.50446e-66	-1.79375	1.25783e-61
IGFL2	2.40953e-66	5.16071	6.72837e-62
RP1-10C16.1	1.74218e-66	-2.56301	4.86485e-62
SPC24	1.66051e-66	2.01867	4.63682e-62
HIST1H3G	1.46564e-66	2.32261	4.09265e-62
FAM81B	1.02924e-66	-2.64582	2.87405e-62
ADAMTS15	7.22176e-67	-2.41873	2.0166e-62
ABCA1	6.60619e-67	1.12375	1.84471e-62
C1orf141	6.10732e-67	-2.55135	1.70541e-62
C11orf70	6.04499e-67	-2.39389	1.688e-62
FAM111B	4.9825e-67	1.61048	1.39131e-62
RBP1	4.9603e-67	2.17077	1.38512e-62
CENPA	4.94566e-67	2.20554	1.38102e-62
FAM225A	4.76823e-67	-1.39385	1.33148e-62
AC022182.3	2.53563e-67	2.65483	7.08049e-63
NELL1	1.96034e-67	5.21691	5.47406e-63
CCNA1	9.09469e-68	-2.18789	2.5396e-63
RAB25	7.24902e-68	1.52898	2.02422e-63
ST18	4.98975e-68	2.3877	1.39334e-63
RP1-167O22.1	4.28987e-68	3.79296	1.1979e-63
CDK15	3.55665e-68	3.31433	9.93158e-64
C17orf96	3.12729e-68	1.63293	8.73264e-64
TPSD1	2.84902e-68	2.95505	7.9556e-64
CCL15	2.01e-68	-2.08705	5.61273e-64
CCDC113	1.26001e-68	-2.15457	3.51845e-64
MMP23B	8.50801e-69	-1.80866	2.37578e-64
MLC1	7.32608e-69	-2.20575	2.04573e-64
ZNF883	5.81786e-69	-1.01713	1.62458e-64
ZG16B	5.61759e-69	2.09668	1.56866e-64
MAOA	5.13977e-69	1.27482	1.43523e-64
TSNAXIP1	4.18883e-69	-2.17048	1.16969e-64
SLC4A11	3.75016e-69	-1.07921	1.0472e-64
SYT17	3.71748e-69	1.29151	1.03807e-64
CFAP206	3.313e-69	-3.07561	9.25121e-65
CXCR5	2.65149e-69	3.03641	7.40403e-65
CPNE5	2.38942e-69	1.86694	6.67221e-65
CTHRC1	2.16019e-69	3.92729	6.03211e-65
STAM	2.10732e-69	1.27695	5.88448e-65
CYP4B1	1.24114e-69	-2.37552	3.46575e-65
PDE3B	1.19048e-69	1.09873	3.3243e-65
IZUMO4	9.67359e-70	1.43757	2.70125e-65
LINC00176	8.96757e-70	1.93698	2.5041e-65
MIR194-2HG	7.60403e-70	-1.94901	2.12335e-65
NSG1	5.26593e-70	-1.77506	1.47046e-65
HIST1H2AJ	4.90914e-70	2.35936	1.37083e-65
SATB2	4.81515e-70	-1.5925	1.34458e-65
KCNN4	4.15325e-70	1.13021	1.15975e-65
AQP5	3.29079e-70	1.79302	9.18919e-66
RP11-713P17.3	3.1815e-70	1.53489	8.88403e-66
TACR2	2.39801e-70	-1.96489	6.6962e-66
STAB1	2.37717e-70	1.46325	6.63801e-66
SOX2	2.02692e-70	-2.30993	5.65996e-66
ALOX15	1.86023e-70	-1.5054	5.1945e-66
TMEM231	1.11961e-70	-1.55359	3.12641e-66
ADCY3	1.11862e-70	1.37279	3.12362e-66
SPATA18	9.69798e-71	-1.80502	2.70806e-66
MAP3K19	4.25368e-71	-2.0622	1.1878e-66
TSPAN1	3.88558e-71	-1.7525	1.08501e-66
UHRF1	3.20715e-71	1.38642	8.95565e-67
KIF4A	2.60145e-71	2.09723	7.2643e-67
RP11-275I14.4	2.27255e-71	-2.78023	6.34586e-67
COL1A2	2.07388e-71	2.5438	5.79111e-67
TNFAIP8L3	1.90031e-71	1.55584	5.30644e-67
AOC1	1.79076e-71	3.95169	5.00052e-67
CLDN5	1.75987e-71	-1.16095	4.91427e-67
KIFC1	1.64126e-71	1.68385	4.58305e-67
LINC00472	1.2687e-71	-2.06094	3.54272e-67
FBXL16	1.07719e-71	1.19176	3.00795e-67
DIAPH3	8.72026e-72	1.6108	2.43505e-67
PMP22	7.99649e-72	1.51322	2.23294e-67
LIF	6.87288e-72	2.31714	1.91918e-67
RAI14	6.04566e-72	1.28778	1.68819e-67
C17orf64	5.76939e-72	-2.0752	1.61104e-67
LRRC4	5.43644e-72	-1.80233	1.51807e-67
LINC00243	1.93569e-72	1.18035	5.40522e-68
PIP	1.87097e-72	-2.9829	5.22451e-68
CHN1	8.90658e-73	2.63717	2.48707e-68
SLC27A2	6.62269e-73	1.75274	1.84932e-68
WDR78	4.14923e-73	-1.92989	1.15863e-68
SYTL4	4.13543e-73	-1.18751	1.15478e-68
2024-03-10	3.54652e-73	-2.1541	9.90331e-69
PDGFD	2.71003e-73	-2.03051	7.56748e-69
PSRC1	2.06355e-73	1.06408	5.76225e-69
IL20RA	9.81394e-74	-2.38125	2.74045e-69
WHSC1	8.53451e-74	1.01108	2.38318e-69
AC004791.2	7.95935e-74	3.39352	2.22257e-69
GJB1	6.67654e-74	5.36936	1.86436e-69
GADD45A	4.70997e-74	1.13134	1.31521e-69
TIFAB	4.63097e-74	1.91216	1.29315e-69
GRIN3B	4.10853e-74	-2.21981	1.14727e-69
ATP10B	4.07704e-74	3.63733	1.13847e-69
DACT3	3.9522e-74	2.84948	1.10361e-69
PRTFDC1	3.37478e-74	2.51679	9.42374e-70
TMEM92	3.35696e-74	2.61117	9.37398e-70
B3GAT1	2.55289e-74	-1.86508	7.1287e-70
NFE2L3	2.23946e-74	1.19866	6.25347e-70
MND1	1.99107e-74	1.89159	5.55987e-70
FGF10-AS1	1.81192e-74	-2.58735	5.0596e-70
CTXN1	1.67037e-74	-2.36566	4.66435e-70
CFAP77	1.58093e-74	-2.39109	4.41459e-70
PTK7	1.31493e-74	1.79266	3.67182e-70
RP11-326C3.2	8.58814e-75	1.2283	2.39815e-70
NEK5	6.10713e-75	-1.808	1.70535e-70
ZNF487	5.59818e-75	-1.11739	1.56324e-70
MAATS1	4.92442e-75	-2.24316	1.3751e-70
RP3-525N10.2	3.44151e-75	-1.04779	9.61008e-71
NT5E	2.90431e-75	1.80413	8.10999e-71
HIST1H2AH	2.84618e-75	1.29173	7.94767e-71
ITGA2	2.01291e-75	1.41265	5.62084e-71
CD24	1.63011e-75	1.26454	4.55191e-71
RASAL1	1.51326e-75	2.99922	4.22564e-71
RP5-1028K7.2	1.51077e-75	1.45513	4.21868e-71
CATIP	1.1838e-75	-1.8576	3.30564e-71
IFI44	8.68086e-76	1.22265	2.42404e-71
MYBL2	7.60405e-76	1.34008	2.12336e-71
NDRG2	5.38372e-76	1.32793	1.50335e-71
DBH-AS1	4.52682e-76	3.31752	1.26407e-71
MESP1	2.9668e-76	2.01693	8.28449e-72
SERPINE2	2.54168e-76	2.22108	7.09739e-72
HSD17B6	2.53127e-76	1.57791	7.06831e-72
BCAT1	2.39055e-76	1.59617	6.67538e-72
CCNB2	1.18803e-76	2.17826	3.31745e-72
NTRK2	1.09445e-76	4.16405	3.05613e-72
RP5-821D11.7	8.12968e-77	1.06432	2.27013e-72
SCN7A	7.78018e-77	4.63052	2.17254e-72
WDR93	7.07189e-77	-2.42365	1.97476e-72
EFCAB12	6.83196e-77	-2.20489	1.90776e-72
GLTPD2	4.97784e-77	-2.07938	1.39001e-72
PROK2	4.87381e-77	-2.16084	1.36096e-72
RP11-193M21.1	4.19322e-77	-2.93838	1.17092e-72
TOX3	3.20826e-77	3.10674	8.95874e-73
LAD1	2.26489e-77	2.28182	6.32449e-73
CCDC96	1.29044e-77	-1.068	3.60344e-73
RAB30	8.20241e-78	1.50283	2.29044e-73
CD207	7.39785e-78	3.20004	2.06578e-73
MELK	6.62226e-78	1.82267	1.8492e-73
RGS13	6.25715e-78	1.85306	1.74725e-73
SRGAP3-AS2	5.11945e-78	-2.61131	1.42955e-73
CDCA3	3.25312e-78	2.02338	9.084e-74
BBOF1	2.65742e-78	-1.69332	7.42058e-74
CHRNA6	2.55569e-78	4.32296	7.13651e-74
SGOL1	2.53609e-78	1.71944	7.08179e-74
CREB3L1	2.12507e-78	2.49252	5.93405e-74
KNDC1	2.03031e-78	-2.25498	5.66943e-74
TNNC2	1.66536e-78	2.8493	4.65034e-74
HS3ST1	1.39004e-78	1.34917	3.88154e-74
RAMP1	1.2389e-78	1.56316	3.45949e-74
CEACAM3	1.21613e-78	-1.91945	3.39591e-74
PDGFA	7.61002e-79	1.56251	2.12502e-74
SLC40A1	7.11e-79	1.11579	1.9854e-74
ANLN	6.04073e-79	1.81019	1.68681e-74
DRC7	4.5212e-79	-2.69206	1.2625e-74
LRRC6	3.83517e-79	-1.45458	1.07093e-74
RP11-483L5.1	2.73733e-79	3.98517	7.64372e-75
OLFML3	2.66877e-79	2.12376	7.45228e-75
LINC01506	2.44682e-79	-1.80911	6.83251e-75
CHIT1	2.31425e-79	1.59324	6.46232e-75
CFAP47	2.18073e-79	-3.37422	6.08946e-75
PTPRT	1.83781e-79	-3.34054	5.13191e-75
GPR162	1.47397e-79	-1.90669	4.1159e-75
NPHP1	1.05527e-79	-1.39564	2.94674e-75
HJURP	1.02248e-79	2.2901	2.85517e-75
OVCH1	6.94503e-80	-1.37601	1.93933e-75
C1orf186	6.77088e-80	2.21197	1.8907e-75
CST2	4.20879e-80	-3.2569	1.17526e-75
METTL7B	4.04531e-80	1.92162	1.12961e-75
CYP2F1	3.69928e-80	-3.50923	1.03299e-75
ANKRD66	2.31341e-80	-2.88033	6.45996e-76
SLC22A3	1.84769e-80	2.30103	5.15948e-76
PIH1D3	1.32899e-80	-2.1246	3.71106e-76
SMIM2-AS1	1.17052e-80	-1.76329	3.26856e-76
DYDC2	1.08999e-80	-3.01934	3.0437e-76
TMEM212	1.04801e-80	-4.04729	2.92646e-76
HPN	8.75264e-81	2.33824	2.44409e-76
FADS2	7.06227e-81	1.10017	1.97207e-76
GRAP	1.82252e-81	1.46483	5.08921e-77
TSPAN13	1.36115e-81	1.5384	3.80086e-77
ASAP2	1.258e-81	1.42878	3.51283e-77
CCL22	1.21008e-81	2.26401	3.37903e-77
CORO6	7.39207e-82	-1.30584	2.06416e-77
SMPDL3B	6.54987e-82	2.51252	1.82899e-77
SCTR	5.00242e-82	3.05029	1.39688e-77
LINC01513	4.04394e-82	-2.90832	1.12923e-77
DEPDC1B	1.81577e-82	2.12528	5.07035e-78
CSGALNACT1	1.57243e-82	1.16927	4.39084e-78
HABP2	1.22515e-82	6.87761	3.42112e-78
DNAH6	1.02826e-82	-2.25371	2.87132e-78
TMEM232	1.00096e-82	-2.27911	2.79507e-78
RRM2	9.91671e-83	1.84864	2.76914e-78
ARSE	8.85544e-83	3.26191	2.47279e-78
IYD	7.56041e-83	2.99713	2.11117e-78
ADGB	7.27654e-83	-2.81037	2.0319e-78
FGF14	6.24707e-83	-3.1788	1.74443e-78
PLEK2	5.77399e-83	1.85023	1.61233e-78
AZGP1	5.40254e-83	2.22783	1.50861e-78
KCNH2	4.44832e-83	3.39446	1.24215e-78
CEACAM1	3.73447e-83	1.13554	1.04281e-78
PPP1R42	3.55506e-83	-3.22059	9.92716e-79
SPC25	3.35402e-83	2.17717	9.36576e-79
FOXM1	2.26469e-83	1.788	6.32391e-79
CDC20	2.03868e-83	2.19655	5.69281e-79
NEK11	1.01946e-83	-1.05653	2.84673e-79
YPEL4	8.43031e-84	-1.00338	2.35408e-79
NHSL2	8.22873e-84	-1.73351	2.29779e-79
RP11-23P13.6	7.0815e-84	1.82704	1.97744e-79
RP11-285E9.5	5.89229e-84	-2.70138	1.64536e-79
HMMR	5.62513e-84	2.02318	1.57076e-79
RP1	4.36756e-84	-3.35898	1.2196e-79
WFIKKN1	1.65717e-84	-1.31966	4.62748e-80
MDH1B	1.40072e-84	-2.46688	3.91137e-80
SNAI2	1.25579e-84	-1.81277	3.50667e-80
RP11-462G2.1	1.15901e-84	4.55468	3.23641e-80
HOXD1	8.09588e-85	2.62674	2.26069e-80
NKX2-1	7.99758e-85	1.51457	2.23324e-80
C1orf158	6.68851e-85	-2.78732	1.8677e-80
RMI2	4.35016e-85	2.13516	1.21474e-80
JUP	4.15716e-85	1.13107	1.16084e-80
HIST1H2BE	3.94536e-85	1.43941	1.1017e-80
DNAH10	2.79098e-85	-2.25561	7.79353e-81
KCNQ3	2.5571e-85	2.41332	7.14044e-81
TTC29	2.47098e-85	-3.81452	6.89997e-81
HMGB3	2.41155e-85	1.39919	6.73401e-81
COL6A3	2.19287e-85	3.59134	6.12337e-81
CYP4F3	2.18909e-85	-2.06634	6.11281e-81
KIF15	1.09513e-85	2.15149	3.05804e-81
SVOPL	7.49024e-86	4.02865	2.09158e-81
CFAP126	6.50921e-86	-2.01935	1.81763e-81
SFTA1P	5.69828e-86	1.48464	1.59119e-81
ACSL4	5.37169e-86	1.09895	1.49999e-81
ANKUB1	4.5721e-86	-2.65516	1.27671e-81
CTD-2015H3.1	1.47771e-86	-2.54388	4.12636e-82
HIST2H2BE	1.27255e-86	1.13252	3.55348e-82
HIST2H2BF	1.25203e-86	1.70823	3.49616e-82
ESCO2	1.18185e-86	1.71795	3.30021e-82
PCAT19	7.47491e-87	-2.46101	2.08729e-82
HIST1H2BJ	7.39434e-87	1.92419	2.0648e-82
PMEPA1	6.28264e-87	1.47927	1.75436e-82
VWA1	6.14177e-87	2.14028	1.71503e-82
CD1C	3.71511e-87	1.04477	1.03741e-82
USP28	3.59541e-87	-1.0478	1.00398e-82
MT1F	2.09725e-87	-1.51893	5.85635e-83
ANKRD35	9.44843e-88	1.98699	2.63838e-83
MYEF2	8.38559e-88	1.1052	2.34159e-83
CPA3	7.33111e-88	3.74888	2.04714e-83
AOC2	3.80616e-88	-1.32885	1.06283e-83
C15orf53	3.66868e-88	1.39159	1.02444e-83
LRRIQ1	2.40287e-88	-2.51398	6.70979e-84
NUF2	2.30013e-88	1.87585	6.42289e-84
C22orf15	1.52528e-88	-2.44307	4.25919e-84
CDKN3	1.4686e-88	1.93438	4.10092e-84
DAW1	1.15822e-88	-2.87644	3.23421e-84
OSCP1	7.21626e-89	-1.59062	2.01507e-84
ANKS1B	4.71049e-89	2.75924	1.31536e-84
LYPD5	4.44468e-89	-1.13873	1.24113e-84
KIF2C	4.22858e-89	2.19276	1.18079e-84
SPRR3	3.54512e-89	-1.40667	9.89938e-85
KIR3DX1	3.5399e-89	-4.01543	9.88482e-85
SERPINI2	2.95006e-89	-2.52208	8.23774e-85
LPAR3	2.5487e-89	-1.00643	7.11699e-85
MANEA-AS1	1.45008e-89	1.04151	4.04919e-85
S100P	1.44013e-89	-1.4543	4.02142e-85
CKAP2L	1.39887e-89	1.94406	3.90621e-85
LINC01070	1.26523e-89	-2.23678	3.53302e-85
SSMEM1	1.07224e-89	-2.43932	2.99412e-85
SIGLEC8	2.72222e-90	3.69911	7.60154e-86
C1orf106	1.54954e-90	2.26679	4.32694e-86
ARMC3	1.10817e-90	-2.4707	3.09445e-86
SPINK5	1.09275e-90	1.90644	3.05139e-86
C2orf81	1.08323e-90	-1.04634	3.02482e-86
SPAG4	1.06447e-90	1.33869	2.97242e-86
TRIM2	7.34674e-91	1.49383	2.0515e-86
CIT	7.16407e-91	1.8865	2.0005e-86
LMCD1	4.40953e-91	1.92803	1.23132e-86
STMND1	2.64654e-91	-2.84321	7.3902e-87
P2RY14	2.09607e-91	1.67947	5.85305e-87
RP11-70C1.1	1.3118e-91	-1.10872	3.66306e-87
AKAP14	1.30708e-91	-2.5238	3.64989e-87
SLC16A1	9.80532e-92	1.18746	2.73804e-87
CDKN2C	8.53675e-92	1.38725	2.3838e-87
VCL	8.29686e-92	-1.10337	2.31682e-87
RP3-492J12.2	4.7324e-92	2.14662	1.32148e-87
SPAG17	4.59513e-92	-2.68001	1.28315e-87
C4orf22	3.69177e-92	-3.12764	1.03089e-87
TRABD2A	2.23939e-92	1.1148	6.25328e-88
CTD-2165H16.4	1.89231e-92	2.63586	5.28408e-88
C6	1.86233e-92	-3.08873	5.20037e-88
C1orf87	1.62962e-92	-2.3705	4.55056e-88
UBE2T	1.48393e-92	1.80928	4.14371e-88
PALMD	1.34838e-92	-2.23087	3.76522e-88
GTSE1	1.338e-92	1.9047	3.73624e-88
MZB1	8.67928e-93	1.01361	2.4236e-88
FCGBP	7.98087e-93	2.53373	2.22858e-88
BUB1B	6.89563e-93	2.1696	1.92554e-88
PTGS2	5.10985e-93	-1.40082	1.42687e-88
EDN1	3.03449e-93	-1.83424	8.4735e-89
TRIM59	2.45716e-93	1.27735	6.86137e-89
RSPH4A	1.73817e-93	-2.27661	4.85368e-89
PTP4A3	7.71729e-94	1.36035	2.15498e-89
TEPP	7.36075e-94	2.27844	2.05542e-89
GFRA3	6.87219e-94	5.15199	1.91899e-89
RNF165	5.31563e-94	-3.13101	1.48434e-89
CSF2	4.59049e-94	2.0614	1.28185e-89
TCAF2	4.56669e-94	1.1127	1.2752e-89
LDLRAD1	2.09862e-94	-2.73155	5.86019e-90
TRAF3	1.90147e-94	1.01529	5.30967e-90
EZH2	3.35858e-95	1.16918	9.37851e-91
TMEM163	2.33847e-95	1.94952	6.52994e-91
GATA2	2.19922e-95	2.7378	6.1411e-91
TNFSF4	1.91198e-95	2.62275	5.33901e-91
SLITRK4	1.80703e-95	-1.20786	5.04595e-91
DCDC1	1.6093e-95	-3.5392	4.4938e-91
RASGRP3	1.31721e-95	1.12288	3.67818e-91
VWA7	6.67963e-96	-1.5585	1.86522e-91
NEU4	6.22964e-96	-1.18361	1.73957e-91
HAMP	2.98931e-96	1.61811	8.34734e-92
SCN9A	2.13809e-96	-1.03731	5.97039e-92
CACNA2D3	1.31975e-96	1.82241	3.68527e-92
CD1E	1.28665e-96	1.54454	3.59285e-92
CCL19	1.22487e-96	2.43442	3.42032e-92
CCDC181	1.09894e-96	-3.01845	3.06868e-92
C5orf63	9.58278e-97	1.13962	2.6759e-92
CCDC40	5.7579e-97	-1.89054	1.60784e-92
ADAT2	5.49509e-97	1.3484	1.53445e-92
ADAMDEC1	3.85922e-97	2.53666	1.07765e-92
NALCN	3.58794e-97	-3.79608	1.0019e-92
FEZ1	2.6992e-97	-2.76444	7.53726e-93
GGTLC1	2.63587e-97	3.37981	7.36041e-93
LRIG3	1.67679e-97	2.87996	4.68227e-93
HDC	1.24145e-97	2.94729	3.46662e-93
RP11-354E11.2	3.59931e-98	3.66224	1.00507e-93
C16orf74	2.9389e-98	1.49396	8.20658e-94
SLCO4A1	1.6922e-98	2.14256	4.72531e-94
SPAG6	1.08997e-98	-2.23704	3.04364e-94
LEMD1	8.42766e-99	5.25836	2.35334e-94
AC004988.1	7.09821e-99	-1.61351	1.9821e-94
DRC1	4.43692e-99	-2.40947	1.23897e-94
RGS22	3.90844e-99	-3.10323	1.09139e-94
RP11-379B8.1	3.62157e-99	-1.66972	1.01129e-94
FCN3	2.85557e-99	-2.61412	7.9739e-95
RNF212	2.73773e-99	2.31061	7.64484e-95
RAB3IL1	2.03488e-99	1.55634	5.6822e-95
AGMAT	2.02415e-99	3.06027	5.65222e-95
DLGAP5	1.68767e-99	2.54839	4.71265e-95
ACHE	1.16301e-99	2.66769	3.24759e-95
ENKUR	9.89758e-100	-2.47692	2.7638e-95
PRR15L	8.81136e-100	2.54336	2.46048e-95
SPEF1	7.78771e-100	-2.27436	2.17464e-95
NCAPH	5.50378e-100	1.41335	1.53687e-95
MAD2L1	5.04288e-100	1.64444	1.40817e-95
AFAP1	4.96758e-100	1.42913	1.38715e-95
MUC4	3.38667e-100	-2.14042	9.45693e-96
HAGLR	3.07867e-100	2.83528	8.59687e-96
VNN3	1.84183e-100	-1.93972	5.14312e-96
TEKT2	1.80681e-100	-2.60748	5.04534e-96
CFAP53	1.28502e-100	-2.40618	3.58828e-96
SUMO4	1.08546e-100	1.52377	3.03103e-96
H2AFY2	9.58117e-101	1.35038	2.67545e-96
WI2-1959D15.1	7.21353e-101	-3.13239	2.01431e-96
SFTPD	3.13494e-101	1.04341	8.75402e-97
LRRC10B	2.71222e-101	-2.78294	7.5736e-97
NCAPG	1.16219e-101	1.97626	3.24531e-97
EPB41L4A-AS2	9.09053e-102	-2.80098	2.53844e-97
HTRA1	7.3892e-102	2.08715	2.06336e-97
GCSAML	6.35503e-102	3.14077	1.77458e-97
CFAP74	1.96165e-102	-3.07737	5.4777e-98
AC104654.2	1.74908e-102	-1.70378	4.88412e-98
TNNI1	6.24408e-103	-2.74077	1.7436e-98
DUSP27	5.72323e-103	-2.92807	1.59816e-98
CCNA2	3.22486e-103	2.35566	9.00509e-99
F3	2.25954e-103	-1.81263	6.30955e-99
CYGB	1.43908e-103	-1.45176	4.01848e-99
CENPK	1.40273e-103	1.2455	3.91698e-99
VWA3A	1.16819e-103	-2.44646	3.26205e-99
HLA-DOB	8.21839e-104	1.67329	2.2949e-99
GATM	3.38251e-104	1.76406	9.44532e-100
LGR6	3.16258e-104	-2.97772	8.83118e-100
DCDC2B	1.53078e-104	-2.5967	4.27455e-100
CHRM3	8.72057e-105	-2.45959	2.43513e-100
UBE2C	6.97407e-105	2.25404	1.94744e-100
GBP7	6.83732e-105	-2.69932	1.90925e-100
MS4A2	2.93518e-105	3.53789	8.19621e-101
EPHX2	1.89024e-105	2.01167	5.2783e-101
MIR3142HG	8.42483e-106	2.21802	2.35255e-101
SLC7A6	5.99421e-106	1.21335	1.67382e-101
KIT	5.31321e-106	2.74628	1.48366e-101
RP11-295M3.4	3.05372e-106	-2.2684	8.52721e-102
RAMP2	2.20403e-106	-1.53284	6.15454e-102
RP11-101E5.1	1.81293e-106	-2.83044	5.06243e-102
PDGFRB	1.29881e-106	-2.54235	3.6268e-102
VWA3B	1.17382e-106	-2.61865	3.27778e-102
SCGB3A2	7.3967e-107	-1.08815	2.06546e-102
AKR1C1	7.26365e-107	-1.51078	2.0283e-102
PACRG	4.53501e-107	-3.45283	1.26636e-102
DNAI2	4.37704e-107	-2.36825	1.22225e-102
GK5	3.1904e-107	-1.20536	8.90886e-103
MUC21	2.00315e-107	2.43912	5.59358e-103
C16orf87	1.03882e-107	1.06211	2.90079e-103
C2orf71	7.07062e-108	-2.8238	1.9744e-103
PDK1	5.92736e-108	1.03266	1.65516e-103
HIST1H2BF	5.62746e-108	2.14383	1.57141e-103
OLFM2	3.14189e-108	2.47092	8.77342e-104
2024-03-03	2.18728e-108	1.78954	6.10777e-104
IL1RL1	2.01177e-108	3.51199	5.61768e-104
KDM5B	1.3486e-108	1.12909	3.76583e-104
PIFO	5.21581e-109	-2.26411	1.45646e-104
CCDC65	3.28916e-109	-1.86003	9.18465e-105
FAM26F	3.07831e-109	1.33282	8.59587e-105
TCTEX1D4	2.66333e-109	-1.9705	7.43708e-105
HIST2H2AA4	1.28492e-109	1.29886	3.58802e-105
RP11-384F7.2	8.416e-110	-2.05674	2.35008e-105
PPP1R1B	7.01791e-110	2.85189	1.95968e-105
CASC5	4.2543e-110	2.0782	1.18797e-105
KRT4	4.23207e-110	-1.39594	1.18176e-105
LRRC71	4.11092e-110	-3.81921	1.14793e-105
DNAH7	4.05458e-110	-2.7242	1.1322e-105
CATSPERD	1.64068e-110	-2.30159	4.58144e-106
BUB1	2.97385e-111	2.27972	8.30418e-107
GAMT	2.74802e-111	1.00483	7.67358e-107
BIRC5	2.29641e-111	2.16569	6.41249e-107
AURKB	7.11849e-112	2.38017	1.98777e-107
GGT1	4.81129e-112	1.50349	1.3435e-107
CD1B	2.61593e-112	2.69035	7.30471e-108
KIF19	2.16305e-112	-2.27662	6.0401e-108
IGLC3	1.66977e-112	1.87791	4.66267e-108
RP11-557H15.4	1.5659e-112	3.14298	4.37263e-108
TNFSF15	1.35582e-112	1.28356	3.78598e-108
DNAH9	8.83973e-113	-2.93017	2.46841e-108
NLRP12	8.54209e-113	-1.25777	2.38529e-108
OMG	6.61554e-113	-2.01478	1.84732e-108
NTRK1	3.43548e-113	3.59927	9.59322e-109
KIF11	1.03933e-113	2.13885	2.90221e-109
DRC3	9.45639e-114	-2.33632	2.6406e-109
CLDN1	5.93925e-114	1.46544	1.65848e-109
IKZF4	4.92929e-114	2.23295	1.37645e-109
HGF	4.11096e-114	1.44649	1.14794e-109
PRC1	2.47249e-114	1.45671	6.90419e-110
DNAI1	1.41109e-114	-3.02816	3.94032e-110
HOXB2	1.1228e-114	1.12109	3.1353e-110
ALDH1A2	1.6418e-115	-1.94693	4.58457e-111
PRR15	1.5919e-115	-1.99577	4.44523e-111
HIST1H2BN	1.07458e-115	1.28331	3.00067e-111
MAL	8.24659e-116	2.62078	2.30278e-111
SAXO2	6.9712e-116	-2.49172	1.94664e-111
CD180	6.67973e-116	1.17228	1.86525e-111
LAIR2	6.44128e-116	1.56147	1.79866e-111
NR0B2	6.42069e-116	4.29239	1.79291e-111
SCARF1	3.46604e-116	1.01752	9.67858e-112
CD1A	1.79918e-116	3.61772	5.02404e-112
IL23A	8.25306e-117	1.90526	2.30459e-112
CFAP52	6.6754e-117	-2.75326	1.86404e-112
ARHGAP11A	4.51081e-117	1.45191	1.2596e-112
MUC3A	2.95724e-117	6.18943	8.25779e-113
FMN1	2.79992e-117	1.26017	7.8185e-113
ARHGAP11B	1.94149e-117	1.50402	5.42143e-113
MXRA8	7.19746e-118	4.09855	2.00982e-113
CTD-2576D5.4	1.79837e-118	2.54913	5.02176e-114
PRSS8	1.6072e-118	2.65471	4.48794e-114
CCDC39	1.27294e-118	-2.91042	3.55456e-114
TPCN1	7.29192e-119	1.16513	2.0362e-114
ACOT11	4.16033e-119	1.43488	1.16173e-114
SLAMF7	3.62855e-119	-1.22548	1.01324e-114
ETV4	3.47355e-119	4.64546	9.69953e-115
SLC22A31	3.42102e-119	1.71966	9.55285e-115
HOTAIRM1	2.81218e-119	-1.04584	7.85273e-115
TMPRSS6	1.72688e-119	4.61274	4.82214e-115
ADAM12	1.40267e-119	2.53506	3.91681e-115
SGPP2	8.0242e-120	2.25057	2.24068e-115
TTLL10	6.07526e-120	-2.48131	1.69646e-115
KLHDC7B	1.95429e-120	1.1669	5.45716e-116
C11orf97	1.7314e-120	-2.97216	4.83477e-116
C6orf118	8.11731e-121	-3.12068	2.26668e-116
SFTA3	6.80167e-121	1.53464	1.8993e-116
CDC14A	6.43766e-121	1.05412	1.79765e-116
CCDC173	6.3801e-121	-2.787	1.78158e-116
OLFML2B	2.08107e-121	2.29528	5.81118e-117
IFITM2	1.86032e-121	-1.21368	5.19476e-117
CCDC144A	1.6457e-121	1.48442	4.59545e-117
IGHG4	1.1501e-121	2.67287	3.21154e-117
C20orf202	4.33354e-122	-3.50029	1.2101e-117
SLC1A7	2.2567e-122	-1.10801	6.30162e-118
CFAP46	5.298e-123	-3.22344	1.47941e-118
SLPI	5.02602e-123	-1.03974	1.40347e-118
TUBA4B	1.96292e-123	-2.9608	5.48125e-119
NOL3	1.93068e-123	1.84495	5.39122e-119
GAL3ST4	1.2388e-123	2.42769	3.45923e-119
NUSAP1	1.02468e-123	1.95104	2.86132e-119
AC145110.1	7.03177e-124	4.76694	1.96355e-119
DNAAF3	3.94028e-124	-2.25576	1.10028e-119
SLC18A2	3.82629e-124	3.52677	1.06845e-119
RAP1GAP	3.73124e-124	2.88486	1.04191e-119
ID3	1.98803e-124	1.55129	5.55138e-120
CD200	1.65142e-124	4.11181	4.61142e-120
CCL13	1.4027e-124	1.94093	3.91689e-120
TMEM37	1.38671e-124	1.71178	3.87224e-120
RALA	3.23609e-125	1.06517	9.03645e-121
HIST1H2AE	2.51664e-125	1.99253	7.02746e-121
ALOX15B	2.0223e-125	2.70832	5.64707e-121
CEACAM8	1.61263e-125	5.11185	4.50311e-121
TNFRSF11A	1.4144e-125	2.80478	3.94957e-121
ECM1	9.7654e-126	2.08498	2.72689e-121
SERPINA9	6.88473e-126	-1.48747	1.92249e-121
SLC12A5	3.27157e-126	2.9141	9.13553e-122
CCIN	1.43827e-126	-3.40663	4.01621e-122
KIF9	9.33559e-127	-1.11418	2.60687e-122
SLAMF9	5.80497e-127	3.80753	1.62098e-122
SMIM22	3.81128e-127	1.21288	1.06426e-122
CST7	3.51483e-127	-1.27989	9.8148e-123
FMO2	3.36173e-127	-2.94996	9.38729e-123
LINC00426	3.0342e-127	1.32497	8.4727e-123
RSPH9	1.95918e-127	-2.45723	5.47082e-123
ADSSL1	1.34964e-127	1.77549	3.76874e-123
CCL28	1.26918e-127	1.07692	3.54406e-123
LINC01550	1.11581e-127	1.18985	3.11579e-123
SMPDL3A	8.74459e-128	1.32	2.44184e-123
ZBBX	4.83066e-128	-2.76585	1.34891e-123
C9orf9	4.40083e-128	-1.63096	1.22889e-123
MYO1D	3.40613e-128	1.28897	9.51128e-124
PRR29	3.31228e-128	-2.71797	9.24922e-124
CCL17	2.84354e-128	2.97098	7.94031e-124
IGHM	2.02369e-128	1.76689	5.65096e-124
MYO7B	7.14132e-129	-1.87819	1.99414e-124
GPR35	4.81358e-129	1.30879	1.34414e-124
CENPM	4.71042e-129	1.53187	1.31534e-124
RNF207	3.31351e-129	2.18134	9.25266e-125
HP	3.17861e-129	-1.26815	8.87594e-125
CD40LG	2.09206e-129	1.00217	5.84187e-125
RASGRF1	2.04509e-129	1.99738	5.71072e-125
COL18A1	1.07636e-129	1.36763	3.00564e-125
CDK1	9.43757e-130	2.11966	2.63535e-125
TPX2	4.58022e-130	2.12739	1.27898e-125
DNAH12	3.21242e-130	-3.19015	8.97036e-126
SH2D4B	1.54955e-130	-2.08919	4.32696e-126
CEP78	1.41523e-130	-1.36115	3.95188e-126
ITGA2B	8.77102e-131	5.71794	2.44922e-126
CENPF	5.45069e-131	2.0813	1.52205e-126
HYDIN	2.95738e-131	-2.94969	8.25819e-127
PVT1	2.53732e-131	1.70185	7.08522e-127
TBX21	2.34119e-131	-1.43304	6.53755e-127
COL3A1	2.0068e-131	3.3057	5.6038e-127
TP53INP1	3.33006e-132	1.21443	9.29887e-128
POU3F1	1.86421e-132	1.79428	5.20562e-128
SAMD3	8.50858e-133	-1.2573	2.37594e-128
PLS3	7.04502e-133	2.26329	1.96725e-128
CHRM3-AS2	6.52491e-133	2.26179	1.82201e-128
NHS	4.47969e-133	2.60213	1.25091e-128
STOML3	3.06227e-133	-4.03613	8.55108e-129
MAST4	2.77467e-133	1.48898	7.748e-129
CLECL1	8.78844e-134	1.60524	2.45408e-129
SELENBP1	7.64626e-134	1.59835	2.13514e-129
RTKN2	6.16109e-134	2.572	1.72042e-129
CDHR3	4.65615e-134	-2.09744	1.30018e-129
PYCR1	4.42172e-134	3.07578	1.23472e-129
MMP9	3.19318e-134	1.31269	8.91663e-130
PRSS36	1.26463e-134	-1.19601	3.53134e-130
DYNC2H1	2.4371e-135	-1.46718	6.80535e-131
FOSL1	2.13197e-135	-1.34426	5.9533e-131
RBM11	1.83652e-135	-1.22502	5.12828e-131
TMIGD3	1.75437e-135	3.31083	4.89889e-131
WDR38	1.26993e-135	-2.77318	3.54614e-131
PTGDS	9.52209e-136	-1.99313	2.65895e-131
NT5DC2	9.37319e-136	1.79643	2.61737e-131
HBG1	6.7074e-136	-1.09184	1.87297e-131
PIK3R6	6.04707e-136	2.02163	1.68858e-131
SDS	3.87581e-136	1.25057	1.08228e-131
FAM216B	2.69154e-136	-2.87547	7.51586e-132
CFP	2.30011e-136	-1.37477	6.42283e-132
F13A1	7.27173e-137	1.44824	2.03056e-132
ANO9	5.24338e-137	1.04179	1.46416e-132
MYO1A	4.28631e-137	-1.61007	1.19691e-132
HIST3H2BB	3.89621e-137	2.69299	1.08798e-132
NDC80	4.97581e-138	1.82178	1.38945e-133
ETV1	2.08225e-138	1.96737	5.81448e-134
ZBTB32	1.90507e-138	2.63234	5.31972e-134
NMUR1	9.61813e-139	-2.29986	2.68577e-134
AC006129.2	7.50304e-139	1.13427	2.09515e-134
CCDC114	5.86839e-139	-2.23	1.63869e-134
AC104820.2	4.81556e-139	1.1756	1.3447e-134
MICAL2	3.24483e-139	1.0993	9.06087e-135
DYNLRB2	1.10555e-139	-2.32955	3.08715e-135
ST8SIA1	5.5708e-140	1.46921	1.55559e-135
PVRL1	1.673e-140	-1.27588	4.67169e-136
CDKN2A	9.74043e-141	1.47684	2.71992e-136
EFCAB1	7.24669e-141	-2.67456	2.02357e-136
EBI3	5.009e-141	2.85675	1.39871e-136
ASPM	4.00745e-141	2.3185	1.11904e-136
TMEM190	1.99498e-141	-3.69161	5.57078e-137
MIR181A1HG	1.76837e-141	1.20443	4.93801e-137
S100A12	1.30395e-141	-2.07359	3.64114e-137
MAL2	1.17937e-141	1.78309	3.29327e-137
MATK	5.90321e-142	-1.26473	1.64841e-137
CCR8	2.37922e-142	4.4241	6.64373e-138
KIF20B	1.11835e-142	1.06561	3.12289e-138
CXCR1	1.76366e-143	-2.00318	4.92483e-139
TSPAN19	1.33992e-143	-3.06509	3.74158e-139
NCR1	4.6403e-144	-2.56223	1.29576e-139
NBL1	1.88341e-144	1.37703	5.25924e-140
VEGFA	1.54579e-144	1.07937	4.31646e-140
AP001055.6	1.46157e-144	1.3141	4.0813e-140
CCNG2	1.27365e-144	1.29251	3.55655e-140
HELLS	8.54869e-145	1.50168	2.38714e-140
RP11-356K23.1	3.12459e-145	-2.68403	8.72511e-141
NREP	2.34387e-145	1.59522	6.54502e-141
PASK	1.24309e-145	2.09143	3.4712e-141
SMIM1	9.75969e-146	2.70193	2.7253e-141
MORN5	3.66663e-147	-2.83268	1.02387e-142
LINC00504	3.45852e-147	-1.27173	9.65756e-143
PLEKHA5	2.37899e-147	1.1348	6.6431e-143
AFAP1-AS1	1.5993e-147	7.59372	4.46589e-143
NDFIP2	8.33607e-148	1.73637	2.32776e-143
APOBEC3A	4.98538e-148	-1.92537	1.39212e-143
BEX2	3.86761e-148	1.60102	1.07999e-143
RP11-452C13.1	2.32009e-148	-1.6863	6.47861e-144
MAPK15	7.23815e-149	-2.21736	2.02118e-144
KCNK5	6.72809e-149	2.30876	1.87875e-144
HIST1H3H	4.48166e-149	2.42932	1.25146e-144
SAPCD1-AS1	3.41546e-149	-1.66119	9.53732e-145
SLC44A1	3.00906e-149	1.32824	8.40251e-145
DNAJC6	2.40345e-149	-1.87245	6.7114e-145
ICA1	1.34656e-149	2.04198	3.76013e-145
HIST1H2BD	2.95301e-150	1.88392	8.24599e-146
HIST1H1B	1.28795e-150	2.70491	3.59647e-146
CRIP2	6.21601e-151	-1.11985	1.73576e-146
CD79A	5.81324e-151	2.29995	1.62329e-146
CCDC78	2.64797e-151	-1.95959	7.3942e-147
DLEC1	1.16293e-151	-2.31191	3.24738e-147
ZBTB25	8.49873e-152	1.0025	2.37319e-147
TEKT1	6.19476e-152	-2.63103	1.72983e-147
FCGR3B	3.95499e-152	-1.65359	1.10439e-147
C3	1.83622e-152	1.04913	5.12746e-148
HOMER3	8.83838e-153	1.06281	2.46803e-148
RP11-1399P15.1	2.95003e-153	3.21476	8.23767e-149
NCAM1	3.04031e-154	-2.52286	8.48976e-150
LINC00607	1.54634e-154	-2.08774	4.31799e-150
SEZ6L2	6.67838e-155	3.88464	1.86487e-150
C9orf135	3.36938e-155	-2.63974	9.40865e-151
BHLHE40-AS1	2.85617e-155	2.4488	7.97557e-151
DTHD1	2.09707e-155	-1.16876	5.85586e-151
COL1A1	1.31711e-155	2.71802	3.67789e-151
ZBED3-AS1	1.23947e-155	-1.13274	3.4611e-151
RP11-307C12.13	7.36111e-156	1.62586	2.05552e-151
MMP2	1.69394e-156	2.12116	4.73017e-152
SYNGR1	4.34159e-157	-1.53122	1.21235e-152
CTGF	3.75286e-157	-2.10963	1.04795e-152
ROPN1L	3.36661e-157	-2.54334	9.40092e-153
KIAA0101	2.65935e-157	1.84356	7.42598e-153
PLAT	9.73422e-158	2.55916	2.71818e-153
PRF1	8.45137e-158	-1.6749	2.35996e-153
CEP55	7.06959e-158	2.3941	1.97411e-153
LINC01281	2.04584e-158	6.21401	5.71282e-154
C9orf116	1.02136e-158	-2.64925	2.85204e-154
RP11-841O20.2	9.05003e-159	1.20592	2.52713e-154
HRH1	4.59602e-159	-1.00548	1.28339e-154
MAGEH1	1.19842e-159	2.14595	3.34645e-155
RP11-283G6.4	4.53361e-160	-2.05898	1.26596e-155
NLRC4	4.26842e-160	-1.00965	1.19191e-155
SKA2	2.94576e-160	1.07583	8.22575e-156
AC020571.3	1.10691e-161	2.77067	3.09094e-157
CXCL1	1.8671e-162	-1.28798	5.21369e-158
CDHR4	1.06084e-162	-3.2961	2.96229e-158
ADORA3	8.75403e-163	3.35723	2.44447e-158
LRRC46	6.35349e-163	-2.31542	1.77415e-158
CCDC153	4.54563e-163	-1.83651	1.26932e-158
MORN2	3.73349e-163	-1.37786	1.04254e-158
HIST1H1E	1.63356e-163	1.08072	4.56154e-159
TSPAN32	6.48415e-164	-1.14541	1.81063e-159
PKP2	2.01514e-164	-1.4333	5.62707e-160
LILRB2	1.98143e-164	-1.13847	5.53294e-160
LINC01480	9.31233e-165	3.25772	2.60037e-160
DAGLA	1.85096e-165	-1.4627	5.16862e-161
EOMES	8.808e-166	-1.39019	2.45955e-161
ERICH3	1.41133e-166	-3.1538	3.941e-162
CAPSL	2.08913e-167	-2.89108	5.83368e-163
FSCN1	1.29748e-167	1.79526	3.62309e-163
TLR8	2.3918e-168	-1.02993	6.67887e-164
CFAP73	2.34178e-169	-2.67905	6.53919e-165
RAP1GAP2	2.0868e-169	-1.86561	5.82718e-165
ZDHHC19	6.88149e-170	-1.85711	1.92159e-165
HIST1H2AG	3.96135e-170	1.66625	1.10617e-165
TYMS	2.83317e-170	1.98737	7.91134e-166
MERTK	1.15566e-171	1.76875	3.22706e-167
WFDC3	3.42061e-172	3.60953	9.5517e-168
CDC42EP2	3.37319e-172	-2.21459	9.4193e-168
TGFBR3	2.70818e-172	-1.68927	7.56232e-168
APOD	1.94927e-172	3.17789	5.44314e-168
IGFBP2	1.6546e-172	-1.08031	4.62031e-168
CFAP43	1.06976e-172	-3.00154	2.98721e-168
ELANE	3.99147e-173	7.21202	1.11458e-168
C5orf49	2.13407e-173	-2.42043	5.95917e-169
SULT1C2	2.07111e-173	3.06522	5.78336e-169
C11orf21	3.90383e-175	-1.20014	1.0901e-170
CFAP100	2.83363e-175	-2.58122	7.91262e-171
A4GALT	2.95557e-176	-1.68194	8.25313e-172
TTC38	2.03594e-176	-1.85658	5.68515e-172
PRSS21	1.91201e-176	-1.85991	5.33909e-172
PLTP	1.03294e-176	1.8508	2.88439e-172
IGFBP4	7.55672e-177	1.60578	2.11014e-172
HSPG2	1.87332e-177	2.63124	5.23106e-173
TMEM156	7.51731e-178	1.03662	2.09913e-173
MRC2	6.02027e-178	1.54713	1.6811e-173
BPIFB1	3.25316e-178	-2.60927	9.08411e-174
TCTN1	2.37311e-178	-1.2837	6.62668e-174
TTC16	1.30316e-178	-2.10106	3.63895e-174
FAM183A	6.22491e-179	-2.49134	1.73824e-174
NELL2	5.63267e-179	1.76984	1.57287e-174
PRSS23	2.45993e-179	-1.95777	6.8691e-175
CMC1	2.2281e-179	-1.04853	6.22174e-175
SNTN	1.94207e-179	-2.96333	5.42304e-175
EGOT	1.06636e-179	2.87827	2.9777e-175
ARHGEF6	3.70794e-180	1.36458	1.03541e-175
PARM1	2.6737e-181	2.07899	7.46603e-177
CHST9	2.45806e-181	-3.22708	6.8639e-177
KLHL5	1.21221e-182	1.04283	3.38497e-178
NPDC1	1.18938e-183	2.25888	3.32123e-179
S100A3	6.78083e-184	-2.8607	1.89348e-179
BTLA	6.77948e-184	2.47699	1.8931e-179
FBLN7	6.66548e-184	2.69152	1.86127e-179
RP6-159A1.4	3.22939e-184	-1.09281	9.01776e-180
FAM92B	1.00155e-184	-2.31227	2.79673e-180
LINC00649	3.66959e-185	1.37726	1.0247e-180
CASK	1.26609e-185	1.30207	3.53542e-181
HLF	9.91845e-186	1.97168	2.76963e-181
SMC4	8.84493e-186	1.12375	2.46986e-181
CMTM2	8.8321e-186	-1.7063	2.46628e-181
FPR2	2.81415e-186	-1.30555	7.85823e-182
WNT10A	7.19239e-188	2.33729	2.0084e-183
AK4	3.20022e-188	2.61073	8.9363e-184
ME3	2.07126e-188	-1.15557	5.78378e-184
RP1-34B20.21	8.18872e-190	1.60199	2.28662e-185
MYBL1	6.65878e-190	-1.67529	1.8594e-185
RP11-459I19.1	5.4415e-190	-1.96107	1.51949e-185
RP11-81H14.2	3.1758e-190	-2.05027	8.86811e-186
ADCY9	1.00292e-190	-1.19347	2.80056e-186
IL18R1	9.54001e-192	1.61223	2.66395e-187
GPR84	4.20323e-192	1.36628	1.17371e-187
PDZD4	1.95288e-192	-3.44479	5.45323e-188
RSPH1	1.26395e-192	-2.6384	3.52946e-188
SUSD3	5.18292e-193	1.6536	1.44728e-188
SEMA7A	1.90859e-193	2.2207	5.32954e-189
[truncated: 528 more rows]

## Sheet: Supplementary Table 5
Supplementary Table 5: DEGs in Stromal cells were identified by single-cell analysis
Gene	p_val	avg_log2FC	p_val_adj
RP11-710C12.1	9.99136e-17	1.44741	2.78999e-12
C16orf74	9.98443e-10	1.65016	2.78805e-05
GABRD	9.97915e-70	5.24467	2.78658e-65
CCDC102B	9.96454e-101	2.41574	2.7825e-96
SHISA2	9.95224e-51	-1.13958	2.77906e-46
P2RY10	9.91111e-16	2.44741	2.76758e-11
NOG	9.9007e-12	1.78616	2.76467e-07
GZMB	9.86656e-33	-1.67588	2.75514e-28
ITGBL1	9.86618e-160	3.63424	2.75503e-155
DOCK10	9.85951e-21	1.16397	2.75317e-16
FZD10	9.83806e-11	1.23077	2.74718e-06
COL1A2	9.82593e-220	3.5322	2.74379e-215
AC008268.1	9.81063e-150	-1.96634	2.73952e-145
TBX4	9.79694e-64	1.96322	2.7357e-59
DENND2A	9.78241e-46	1.44705	2.73164e-41
RP11-236L14.2	9.77948e-08	1.53815	0.00273082
CLMP	9.74561e-62	1.71075	2.72136e-57
CXCL2	9.72864e-68	-1.31685	2.71662e-63
KCNK3	9.71445e-14	1.32212	2.71266e-09
TPPP3	9.70846e-139	-1.01471	2.71099e-134
ARHGAP15	9.69676e-28	1.25298	2.70772e-23
CYP51A1	9.66952e-46	-1.36469	2.70012e-41
PRC1	9.61861e-09	1.09355	0.00026859
SPON1	9.60889e-85	1.97485	2.68319e-80
BOC	9.60789e-72	1.7665	2.68291e-67
FGF11	9.59326e-26	2.45853	2.67882e-21
CTD-3193K9.4	9.57663e-19	1.00937	2.67418e-14
FGF13	9.54862e-25	1.72454	2.66636e-20
IGSF21	9.53642e-23	-2.70114	2.66295e-18
HIC1	9.5321e-120	1.45657	2.66174e-115
SERPINH1	9.51929e-127	1.32304	2.65817e-122
PDE3A	9.47768e-61	2.04315	2.64655e-56
CSPG4	9.45899e-14	1.44348	2.64133e-09
LINC01503	9.45648e-15	1.04717	2.64063e-10
L1TD1	9.42344e-07	1.04828	0.026314
KRT13	9.41157e-77	1.67622	2.62809e-72
TYMS	9.39435e-16	1.35377	2.62328e-11
TNIP3	9.37479e-19	-1.34999	2.61782e-14
RARRES2	9.37281e-16	1.0346	2.61726e-11
ALDH1L2	9.37159e-58	2.36119	2.61692e-53
HIST1H3H	9.3431e-18	2.39987	2.60897e-13
HIST1H2BG	9.3076e-10	1.16547	2.59905e-05
COL24A1	9.30685e-44	2.96119	2.59885e-39
XYLT1	9.26468e-31	1.31377	2.58707e-26
PAPPA	9.25693e-13	1.23379	2.58491e-08
AGBL1	9.24813e-23	-1.23755	2.58245e-18
LOXL1	9.2449e-109	2.77391	2.58155e-104
FAM132A	9.20891e-11	1.38301	2.57149e-06
IGFBP5	9.20329e-77	2.04235	2.56993e-72
HMGCS1	9.17702e-95	-1.03959	2.56259e-90
RP5-1092A3.4	9.16301e-10	1.34049	2.55868e-05
MYBPC2	9.13614e-24	2.83086	2.55118e-19
SMIM3	9.12369e-50	1.49102	2.5477e-45
C8B	9.11989e-09	-2.26984	0.000254664
BTLA	9.06451e-19	2.35965	2.53117e-14
IGFBP2	9.06011e-58	1.0535	2.52995e-53
AL928768.3	9.05161e-11	2.57953	2.52757e-06
FMO3	9.04709e-47	1.27677	2.52631e-42
CLDN8	9.04192e-12	-1.15949	2.52486e-07
APOH	8.99372e-22	-1.40228	2.51141e-17
TMEM130	8.99095e-29	2.18123	2.51063e-24
SIT1	8.99021e-21	1.7995	2.51043e-16
ADAM19	8.9659e-70	1.59595	2.50364e-65
LGI2	8.96217e-66	2.33213	2.5026e-61
KIF26B	8.95217e-123	4.67531	2.4998e-118
GLIS3	8.92949e-73	-1.18095	2.49347e-68
LYZ	8.91484e-176	2.0582	2.48938e-171
CDCA7	8.87025e-24	2.24891	2.47693e-19
GXYLT2	8.86818e-102	2.31405	2.47635e-97
RIMS1	8.82467e-07	-1.1891	0.024642
IGHG3	8.80964e-308	3.25216	2.46e-303
EGFL6	8.78858e-132	3.33795	2.45412e-127
MSR1	8.78447e-82	-1.7041	2.45298e-77
KLRD1	8.75483e-41	-2.55663	2.4447e-36
TRPC6	8.72719e-26	1.62738	2.43698e-21
MAK	8.71739e-12	-1.29675	2.43424e-07
FOXL1	8.69811e-19	1.59053	2.42886e-14
FAM78B	8.67436e-26	2.42264	2.42223e-21
COL6A1	8.66064e-101	1.98264	2.4184e-96
LTF	8.64962e-88	2.30868	2.41532e-83
C16orf95	8.61105e-07	1.25638	0.0240455
ZC3H12D	8.59419e-24	2.39816	2.39984e-19
COL7A1	8.58908e-33	1.54622	2.39841e-28
DZIP1	8.57598e-80	1.81697	2.39476e-75
CSDC2	8.57127e-39	1.6634	2.39344e-34
CXCR2	8.50521e-07	-1.61276	0.0237499
RP11-76C10.5	8.49699e-08	-1.04872	0.0023727
CD79A	8.4888e-123	3.84634	2.37041e-118
APCDD1	8.43314e-22	1.0141	2.35487e-17
HMGCS2	8.39706e-24	-1.11326	2.3448e-19
TNFRSF18	8.39092e-63	2.62179	2.34308e-58
LILRA6	8.37975e-17	-1.43409	2.33996e-12
KCNIP3	8.37166e-09	1.56244	0.00023377
RAB23	8.3707e-42	1.01768	2.33743e-37
BHLHE40-AS1	8.36427e-11	1.80955	2.33564e-06
TWIST1	8.34365e-64	3.32468	2.32988e-59
IL18BP	8.3214e-56	1.13988	2.32367e-51
ZCCHC18	8.31461e-12	2.10809	2.32177e-07
PMEPA1	8.30888e-53	1.36857	2.32017e-48
CD6	8.29961e-18	1.51381	2.31758e-13
VGLL1	8.28687e-09	-2.25763	0.000231403
BHLHE22	8.2833e-95	4.17442	2.31303e-90
LOX	8.26171e-65	1.34651	2.307e-60
LAMB1	8.25435e-241	2.13226	2.30494e-236
HOXA2	8.24917e-13	1.15706	2.3035e-08
SMOC2	8.23846e-41	1.88249	2.30051e-36
IGLC7	8.16198e-84	3.46757	2.27915e-79
RP11-61I13.3	8.15482e-07	1.9406	0.0227715
AIM2	8.15369e-08	1.58191	0.00227684
GREM1	8.14496e-64	4.50687	2.2744e-59
CTLA4	8.13831e-76	2.91266	2.27254e-71
HDC	8.12779e-08	1.20667	0.0022696
MT1E	8.12198e-133	-1.54178	2.26798e-128
HHIPL1	8.09127e-21	1.45594	2.25941e-16
CPT1C	8.05635e-30	1.51807	2.24966e-25
LTA	8.04634e-18	1.97431	2.24686e-13
HYAL1	8.03571e-35	-1.05182	2.24389e-30
CYP2A13	8.01525e-10	-2.40547	2.23818e-05
CD2	7.99922e-29	1.0677	2.2337e-24
TMEM158	7.98562e-33	1.82821	2.2299e-28
RP11-161M6.2	7.98554e-51	2.85509	2.22988e-46
CCL21	7.97625e-11	-1.33683	2.22729e-06
DCC	7.97223e-46	-1.86258	2.22617e-41
RP11-395G23.3	7.97162e-15	1.48459	2.22599e-10
TRO	7.96163e-11	1.45726	2.2232e-06
ENPEP	7.95981e-11	1.45035	2.2227e-06
TGFB3	7.93315e-29	1.12924	2.21525e-24
SPRR1B	7.89948e-08	2.38588	0.00220585
MDFI	7.87339e-93	1.82496	2.19856e-88
TRAF5	7.85427e-33	1.09797	2.19323e-28
PLCB1	7.84109e-39	1.79301	2.18955e-34
PLCD4	7.83953e-09	1.76824	0.000218911
SSTR2	7.83772e-28	2.21225	2.1886e-23
PCDH17	7.82653e-16	1.50145	2.18548e-11
ANGPT2	7.82389e-17	1.02892	2.18474e-12
GRP	7.8128e-22	2.52004	2.18165e-17
ACAP1	7.80389e-28	1.38267	2.17916e-23
NOX4	7.79046e-67	2.80323	2.17541e-62
CDKN3	7.78293e-14	1.80417	2.17331e-09
GNLY	7.77535e-69	-1.93094	2.17119e-64
PTN	7.76599e-98	2.50904	2.16857e-93
EMP2	7.73904e-65	-1.17391	2.16105e-60
MSC	7.7299e-90	2.09728	2.1585e-85
PLEKHH2	7.72759e-41	1.14553	2.15785e-36
EBF1	7.716e-36	1.47823	2.15462e-31
AC011899.9	7.69991e-09	-1.02041	0.000215012
GJC1	7.6899e-65	2.43502	2.14733e-60
S100A7	7.68602e-08	1.44833	0.00214624
PLXNC1	7.67906e-63	1.19395	2.1443e-58
RP11-51J9.5	7.67209e-22	1.59692	2.14235e-17
HBG1	7.66899e-28	1.61133	2.14149e-23
ST8SIA1	7.63584e-43	2.1177	2.13223e-38
PTGIR	7.61215e-85	1.50573	2.12562e-80
FGF1	7.60729e-24	1.53182	2.12426e-19
AC079767.4	7.57867e-12	2.81927	2.11627e-07
LRRC15	7.57213e-72	3.70011	2.11444e-67
KIF23	7.57194e-09	1.52932	0.000211439
CMTM2	7.57149e-10	-2.74643	2.11426e-05
CCR1	7.53253e-17	-1.34772	2.10338e-12
SDSL	7.5128e-22	1.01223	2.09787e-17
HRC	7.4616e-12	1.79242	2.08358e-07
CILP	7.452e-46	3.77862	2.0809e-41
VAMP1	7.44708e-15	1.37967	2.07952e-10
SGCD	7.41767e-83	2.08452	2.07131e-78
LZTS1	7.39036e-112	4.01712	2.06368e-107
CTSE	7.38737e-34	1.04	2.06285e-29
UPK3B	7.38685e-26	-2.49507	2.0627e-21
RLTPR	7.38013e-08	2.10926	0.00206083
CIB2	7.37339e-19	1.48094	2.05895e-14
CERCAM	7.35557e-68	1.76714	2.05397e-63
CTD-3252C9.4	7.26808e-46	1.11025	2.02954e-41
CPA3	7.24084e-55	1.9909	2.02193e-50
CYGB	7.22333e-76	2.10063	2.01704e-71
MMP17	7.21627e-17	1.97541	2.01507e-12
SERPINE1	7.21336e-60	1.34094	2.01426e-55
DUSP2	7.19574e-76	1.14073	2.00934e-71
SCT	7.18248e-14	1.59503	2.00564e-09
ADAMTSL3	7.17893e-32	1.5032	2.00464e-27
GUCY1B3	7.16531e-32	1.48035	2.00084e-27
NCKAP5	7.15973e-18	-1.32114	1.99928e-13
RNF128	7.1542e-32	-1.09654	1.99774e-27
RP11-626H12.2	7.11655e-24	4.25643	1.98723e-19
LDLRAD2	7.10093e-09	1.24621	0.000198286
MAP1B	7.09953e-64	1.20567	1.98247e-59
MOXD1	7.09334e-170	3.88341	1.98074e-165
A2M	7.07281e-92	1.22181	1.97501e-87
PRKAR2B	7.02308e-20	1.02493	1.96112e-15
NDUFA4L2	7.01281e-42	2.45098	1.95826e-37
CNTNAP1	6.99753e-12	1.32186	1.95399e-07
CST2	6.99374e-54	4.09379	1.95293e-49
GZMK	6.92421e-22	1.49407	1.93352e-17
RP1-142L7.8	6.92308e-19	1.12567	1.9332e-14
SLURP1	6.92021e-11	2.05465	1.9324e-06
PSD	6.9153e-19	1.53685	1.93103e-14
SCARF2	6.90491e-65	1.54154	1.92813e-60
BGN	6.90052e-230	3.41942	1.9269e-225
OLR1	6.88384e-21	1.12539	1.92224e-16
SERPINE2	6.87558e-71	1.22489	1.91994e-66
CYP2A6	6.86852e-17	-2.91919	1.91796e-12
TUBA4B	6.85146e-09	-1.44725	0.00019132
SCG5	6.8437e-28	1.87201	1.91103e-23
KLK11	6.84327e-46	-1.55009	1.91091e-41
COL6A2	6.82402e-168	1.8786	1.90554e-163
GPR35	6.81768e-07	1.42871	0.0190377
MMP2	6.81159e-178	2.90347	1.90207e-173
FSCN1	6.80175e-66	1.06585	1.89932e-61
CCDC28B	6.79726e-61	1.41669	1.89807e-56
MUC15	6.7827e-101	-1.37927	1.894e-96
EIF5A2	6.78102e-15	1.05268	1.89353e-10
LINC01579	6.77859e-07	-1.82894	0.0189285
HBA1	6.76684e-71	1.56245	1.88957e-66
AZIN2	6.76574e-40	2.01572	1.88927e-35
COL6A3	6.76225e-231	4.18415	1.88829e-226
TMEM200B	6.75209e-25	1.49701	1.88545e-20
RFTN2	6.74584e-48	1.74665	1.88371e-43
MEST	6.74054e-20	1.44428	1.88223e-15
BMP7	6.7347e-43	2.27916	1.8806e-38
RP5-1198O20.4	6.73151e-11	1.04139	1.87971e-06
C1S	6.71374e-173	2.14966	1.87475e-168
MEX3B	6.69178e-28	1.19575	1.86861e-23
MYBL2	6.67551e-14	2.82142	1.86407e-09
HIST1H2BC	6.6687e-11	1.29789	1.86217e-06
FGFBP2	6.66775e-44	-2.78908	1.8619e-39
PAQR5	6.6641e-22	-1.04183	1.86088e-17
MUC3A	6.6503e-07	1.69244	0.0185703
STARD4-AS1	6.64919e-23	1.28318	1.85672e-18
VWA1	6.63989e-56	1.43296	1.85412e-51
HTRA1	6.61182e-105	1.85253	1.84628e-100
CSMD2	6.60667e-29	2.51748	1.84485e-24
RP11-54O7.3	6.57631e-10	1.42048	1.83637e-05
DOK6	6.56227e-53	2.06861	1.83245e-48
DISC1	6.55321e-16	1.11007	1.82992e-11
KCNQ5	6.53741e-07	1.44312	0.0182551
NR5A2	6.53422e-29	1.53659	1.82462e-24
RP11-181E10.3	6.53349e-66	2.6442	1.82441e-61
TPX2	6.51575e-09	1.41362	0.000181946
C6orf141	6.51532e-13	-1.38028	1.81934e-08
EZH2	6.51141e-15	1.00725	1.81825e-10
ZNF454	6.49508e-19	1.25979	1.81369e-14
BPIFB1	6.44152e-18	-1.18371	1.79873e-13
TRAC	6.41728e-149	1.93328	1.79196e-144
PIEZO2	6.39471e-115	2.41749	1.78566e-110
PLPPR4	6.3818e-78	3.89149	1.78205e-73
COL8A2	6.37867e-29	1.29306	1.78118e-24
RP11-474N24.6	6.37591e-08	-1.24953	0.00178041
COL6A6	6.37174e-35	1.0684	1.77925e-30
RCAN2	6.36775e-67	1.06452	1.77813e-62
B4GALNT1	6.36499e-19	1.9199	1.77736e-14
RPS6KL1	6.3633e-07	1.60575	0.0177689
TNN	6.36103e-14	1.96791	1.77625e-09
GRIP2	6.34434e-08	1.37773	0.00177159
ANXA3	6.34375e-35	-1.12925	1.77143e-30
RASL11B	6.32927e-16	1.44474	1.76739e-11
FAM101B	6.32506e-47	1.18626	1.76621e-42
CD5L	6.32249e-16	-3.70977	1.76549e-11
CCDC64	6.32047e-16	1.57784	1.76493e-11
UBD	6.30796e-51	2.19773	1.76143e-46
CCL26	6.29814e-35	4.09491	1.75869e-30
HECW1	6.29631e-23	3.14853	1.75818e-18
ECM2	6.28863e-107	1.5881	1.75604e-102
TOP2A	6.28404e-26	2.57057	1.75475e-21
SUSD3	6.28015e-07	1.32905	0.0175367
KLHL23	6.27423e-07	1.03775	0.0175202
ST3GAL4	6.23828e-44	1.09985	1.74198e-39
HOXB-AS3	6.23344e-30	1.02672	1.74063e-25
FGFBP1	6.20913e-51	-1.84421	1.73384e-46
XDH	6.2019e-15	3.01064	1.73182e-10
UHRF1	6.19988e-07	1.31439	0.0173125
GPX7	6.19788e-44	1.25355	1.7307e-39
GH1	6.19521e-13	1.40874	1.72995e-08
KIAA1211	6.19247e-71	5.18825	1.72919e-66
RP11-803D5.4	6.17292e-32	1.40553	1.72372e-27
PODN	6.16572e-116	1.90181	1.72171e-111
MMP14	6.15656e-49	1.36199	1.71916e-44
SLC26A9	6.1346e-08	1.0917	0.00171302
RP11-268J15.5	6.12344e-16	1.21116	1.70991e-11
CTD-3184A7.4	6.12262e-10	1.11204	1.70968e-05
ATP8A2	6.10193e-31	-1.19521	1.7039e-26
CRABP2	6.03556e-49	1.59324	1.68537e-44
HEATR4	6.02563e-07	-2.35106	0.016826
P3H1	6.02103e-70	1.3275	1.68131e-65
SLC6A1	6.00999e-10	1.72033	1.67823e-05
RGS3	6.00237e-28	1.14957	1.6761e-23
CHI3L1	6.00121e-106	1.77405	1.67578e-101
LHFP	5.99661e-53	1.16754	1.67449e-48
RP11-54O7.17	5.99061e-11	1.29184	1.67282e-06
FBXL22	5.95753e-08	1.46015	0.00166358
C10orf67	5.95083e-07	-2.11992	0.0166171
MARK1	5.93621e-19	1.71379	1.65763e-14
PLXDC1	5.9333e-11	2.10627	1.65681e-06
C15orf59	5.93326e-16	1.81959	1.6568e-11
CPNE5	5.91484e-37	2.29113	1.65166e-32
ADAMTS14	5.88451e-43	3.39727	1.64319e-38
CARMN	5.8607e-81	1.92714	1.63654e-76
STAMBPL1	5.85583e-28	1.28723	1.63518e-23
TRDC	5.84911e-23	-2.18165	1.6333e-18
TMEM121	5.84357e-33	1.09375	1.63176e-28
PODXL2	5.83523e-33	2.05212	1.62943e-28
SH3PXD2B	5.83321e-44	1.28384	1.62887e-39
SV2A	5.82392e-19	1.32798	1.62627e-14
MPPED2	5.81438e-16	1.27244	1.62361e-11
CTA-286B10.7	5.79851e-13	-4.47561	1.61917e-08
NPB	5.79729e-11	1.33743	1.61883e-06
HIST2H4A	5.79656e-07	1.89366	0.0161863
CCDC184	5.7903e-10	2.14042	1.61688e-05
PCDH18	5.78864e-72	2.03606	1.61642e-67
WDR86	5.78593e-14	1.44707	1.61566e-09
ATOH8	5.78128e-37	-1.11597	1.61437e-32
CDKN2A	5.77044e-75	2.95092	1.61134e-70
C1R	5.76832e-139	1.72788	1.61075e-134
IQSEC3	5.7567e-08	-2.51465	0.0016075
MXRA5	5.75573e-221	4.00033	1.60723e-216
RP11-1399P15.1	5.7504e-15	3.19001	1.60574e-10
C1QC	5.74716e-71	-1.5927	1.60484e-66
GPD1	5.736e-18	-2.02546	1.60172e-13
CXCL9	5.7293e-33	2.30129	1.59985e-28
IGFN1	5.72492e-10	1.94579	1.59863e-05
F13A1	5.71907e-15	-1.46167	1.59699e-10
LAMA3	5.7123e-52	-1.22993	1.5951e-47
LILRB2	5.71027e-25	-1.76829	1.59454e-20
NDC80	5.65436e-08	1.29815	0.00157892
LAT	5.64428e-20	1.23801	1.57611e-15
SSPN	5.64005e-41	1.17671	1.57493e-36
HEYL	5.63006e-51	1.8936	1.57214e-46
KCNK17	5.62373e-11	1.62439	1.57037e-06
PASK	5.61094e-41	2.13304	1.5668e-36
ELF5	5.6108e-38	-1.05777	1.56676e-33
PAX9	5.6065e-14	-1.28793	1.56556e-09
RP11-46J23.1	5.60442e-09	-1.06459	0.000156498
NFATC4	5.59053e-36	1.54949	1.5611e-31
AURKB	5.58871e-14	1.77589	1.56059e-09
DAW1	5.56798e-10	-1.53545	1.5548e-05
COL4A1	5.55465e-143	2.51838	1.55108e-138
TESPA1	5.54798e-21	1.89945	1.54922e-16
CNPY4	5.5326e-43	1.00113	1.54492e-38
CA2	5.52205e-104	-1.21097	1.54198e-99
HBA2	5.51894e-73	1.53945	1.54111e-68
PI15	5.50494e-07	3.31558	0.015372
PCDH9	5.50489e-68	-1.12244	1.53719e-63
RP11-302L19.3	5.50074e-13	1.1836	1.53603e-08
NELL2	5.49985e-09	1.75257	0.000153578
CPS1	5.48951e-12	2.15959	1.53289e-07
HAS2	5.47775e-118	2.33027	1.52961e-113
RASD2	5.47581e-21	1.76878	1.52907e-16
ATP6AP1L	5.47422e-09	1.19019	0.000152862
COL18A1	5.45781e-123	1.80052	1.52404e-118
KTN1-AS1	5.45684e-07	1.36907	0.0152377
DDR2	5.44394e-83	1.48351	1.52016e-78
WASF1	5.42197e-27	1.31442	1.51403e-22
NIM1K	5.40572e-25	-1.33912	1.50949e-20
WFDC12	5.37966e-10	-1.37204	1.50222e-05
MMP16	5.37517e-43	3.56808	1.50096e-38
RND1	5.37309e-35	-1.18856	1.50038e-30
TENM1	5.36472e-15	1.31525	1.49805e-10
TESC	5.3634e-84	2.00457	1.49767e-79
FFAR4	5.34683e-15	-1.77043	1.49305e-10
ADAMTS12	5.3373e-139	3.36026	1.49039e-134
ADAMTSL1	5.32736e-07	1.11899	0.0148761
ENOX1	5.32554e-38	3.07946	1.4871e-33
TEPP	5.31789e-08	1.39827	0.00148497
STEAP2	5.30021e-46	1.79677	1.48003e-41
KLRC2	5.29833e-14	-1.68893	1.47951e-09
LINC00926	5.29714e-22	2.46331	1.47917e-17
SLAMF1	5.29262e-13	1.29655	1.47791e-08
TNFSF4	5.26277e-12	1.39992	1.46958e-07
C1QTNF6	5.26272e-85	1.93105	1.46956e-80
IRF4	5.25943e-21	2.03636	1.46864e-16
CD248	5.25127e-137	2.55315	1.46637e-132
ESM1	5.2416e-29	2.50354	1.46367e-24
NID2	5.23603e-98	2.28803	1.46211e-93
ZNF521	5.23235e-103	1.47267	1.46108e-98
RMI2	5.20598e-12	1.47438	1.45372e-07
NUSAP1	5.2049e-08	1.59335	0.00145342
KRT6A	5.20069e-46	1.78886	1.45224e-41
GJB3	5.18513e-08	-1.15445	0.0014479
RARRES1	5.18066e-40	1.4333	1.44665e-35
MMP23B	5.17337e-60	1.56676	1.44461e-55
ADGRF3	5.17226e-09	1.97301	0.00014443
LINC01140	5.16851e-16	1.70615	1.44325e-11
CTD-2165H16.4	5.16828e-10	1.15082	1.44319e-05
CCL20	5.1437e-10	-1.83829	1.43633e-05
PABPC5	5.14259e-43	2.03979	1.43602e-38
ADAM12	5.13675e-92	3.94808	1.43439e-87
NPW	5.13043e-11	1.38991	1.43262e-06
VSTM1	5.11539e-19	3.60887	1.42842e-14
PAMR1	5.10193e-36	2.03486	1.42466e-31
CPNE7	5.09909e-122	4.8914	1.42387e-117
C1QB	5.09321e-95	-1.47769	1.42223e-90
KCND1	5.08987e-15	2.29716	1.42129e-10
FBLN2	5.07228e-54	1.15013	1.41638e-49
LBP	5.06555e-21	2.28906	1.4145e-16
FREM1	5.06446e-12	1.71699	1.4142e-07
ANKRD35	5.05459e-29	1.20449	1.41144e-24
RP11-196G18.24	5.0532e-13	2.17794	1.41106e-08
TNFAIP6	5.04047e-83	1.84762	1.4075e-78
RP11-635O16.2	5.03595e-29	-1.62203	1.40624e-24
GATM	5.03497e-08	1.0078	0.00140597
PCDHB10	5.03426e-16	1.33349	1.40577e-11
TPPP	5.03117e-28	-1.05603	1.4049e-23
SRRM3	5.02266e-26	2.21636	1.40253e-21
DPEP1	5.02021e-69	5.27042	1.40184e-64
RP11-783K16.5	5.01284e-11	1.58064	1.39979e-06
VCAN	5.0105e-135	2.27996	1.39913e-130
EMILIN1	5.009e-167	3.10795	1.39871e-162
HIST2H2AA4	5.00586e-09	1.25603	0.000139784
ADGRA2	4.99222e-123	1.66063	1.39403e-118
GPM6A	4.98844e-28	-1.16001	1.39297e-23
EXOC3L2	4.9864e-67	2.40601	1.3924e-62
DIO2	4.98395e-79	4.87392	1.39172e-74
OLFML1	4.98014e-77	1.55193	1.39065e-72
NTM	4.96272e-136	1.62073	1.38579e-131
MTTP	4.94437e-13	2.11218	1.38067e-08
PLOD1	4.91071e-44	1.04729	1.37127e-39
MFAP2	4.89501e-235	3.64858	1.36688e-230
JCHAIN	4.88802e-86	1.80713	1.36493e-81
FBF1	4.87163e-07	1.12588	0.0136035
ADAMTS2	4.86605e-112	3.14083	1.3588e-107
LAMA2	4.85566e-136	2.69427	1.35589e-131
RP6-159A1.4	4.84577e-18	1.80753	1.35313e-13
MMP12	4.84224e-38	3.2387	1.35215e-33
ZNF436	4.81266e-28	1.12778	1.34389e-23
CENPP	4.80262e-16	1.54052	1.34108e-11
STK32A	4.79222e-12	1.10175	1.33818e-07
TMEM119	4.77686e-132	2.94641	1.33389e-127
LY6K	4.77114e-13	-2.16568	1.33229e-08
LRCOL1	4.75724e-09	1.24664	0.000132841
AC020571.3	4.75382e-22	2.18349	1.32746e-17
SCD5	4.74277e-10	-1.30765	1.32437e-05
GATA5	4.72191e-17	1.62108	1.31855e-12
POSTN	4.70948e-95	2.30979	1.31508e-90
ADGRB2	4.70437e-14	1.48329	1.31365e-09
CEACAM8	4.69774e-70	8.48224	1.3118e-65
ASPN	4.69003e-176	3.37778	1.30964e-171
NR2F2-AS1	4.68877e-41	1.35777	1.30929e-36
ISM1	4.68782e-74	3.42817	1.30903e-69
ADAM8	4.68179e-07	1.05042	0.0130734
AGAP2-AS1	4.67514e-34	1.20988	1.30549e-29
RBP4	4.67108e-18	-1.22249	1.30435e-13
NETO1	4.65839e-34	3.92208	1.30081e-29
CDKN2B-AS1	4.63053e-09	1.53547	0.000129303
STK39	4.62301e-20	1.0388	1.29093e-15
WNT3A	4.6126e-07	-2.0456	0.0128802
LINC01266	4.60542e-22	2.0026	1.28602e-17
KRT6C	4.57602e-09	1.78982	0.000127781
NT5M	4.57311e-08	1.61819	0.00127699
NBL1	4.55052e-123	2.1532	1.27069e-118
CRNN	4.54427e-14	1.80082	1.26894e-09
LTBP1	4.54251e-82	1.64063	1.26845e-77
CD36	4.5314e-102	-1.14673	1.26535e-97
TAGAP	4.52724e-19	1.28966	1.26419e-14
COL16A1	4.52707e-128	2.418	1.26414e-123
P2RX5	4.525e-15	2.87075	1.26356e-10
HIST1H4H	4.52314e-10	1.27226	1.26304e-05
TMEM97	4.51048e-75	-1.10399	1.25951e-70
LHX6	4.5088e-21	1.5387	1.25904e-16
THBS4	4.50602e-08	1.18954	0.00125826
MT1M	4.48931e-25	-1.04113	1.2536e-20
RASL12	4.47492e-89	1.195	1.24958e-84
PCDHB12	4.46572e-16	1.47308	1.24701e-11
LTB	4.4616e-208	2.48443	1.24586e-203
TMEM266	4.45966e-33	2.8475	1.24531e-28
ANKRD22	4.44011e-17	1.18987	1.23986e-12
KDELC1	4.43449e-38	1.0655	1.23829e-33
AEBP1	4.4286e-147	2.71211	1.23664e-142
APOBEC3A	4.41389e-11	-2.64847	1.23253e-06
CACNA1H	4.41283e-22	1.4737	1.23224e-17
C9orf47	4.40626e-29	2.23798	1.2304e-24
FAM167B	4.40341e-33	1.20675	1.22961e-28
UNC13A	4.39976e-20	4.50525	1.22859e-15
LINC01314	4.37503e-15	-1.08265	1.22168e-10
SYN1	4.36187e-15	2.13374	1.21801e-10
NRCAM	4.34837e-35	3.20784	1.21424e-30
CTD-3064M3.7	4.33833e-08	1.34949	0.00121143
DACT3	4.33831e-57	1.47916	1.21143e-52
FRZB	4.32126e-159	2.71839	1.20667e-154
MYEOV	4.3119e-20	4.29514	1.20405e-15
LYPD3	4.30657e-24	2.02803	1.20257e-19
GNB3	4.28903e-09	1.38792	0.000119767
PCOLCE	4.28564e-148	2.60218	1.19672e-143
ALPP	4.2786e-07	-2.11931	0.0119476
CTSW	4.25769e-25	-1.35289	1.18892e-20
SYCE1	4.25761e-11	-2.1444	1.18889e-06
PPFIA2	4.23101e-65	3.23958	1.18147e-60
ASIC1	4.2118e-08	2.06214	0.0011761
RP5-1028K7.2	4.20405e-15	3.0015	1.17394e-10
NKD2	4.17671e-124	2.33929	1.1663e-119
RP1	4.17164e-21	-1.6789	1.16489e-16
ENTPD1	4.1585e-62	1.20223	1.16122e-57
PABPC4L	4.15368e-12	1.14913	1.15987e-07
RP11-247C2.2	4.14943e-32	2.97471	1.15869e-27
FAM13C	4.12445e-58	1.83338	1.15171e-53
UPK2	4.12082e-07	-2.94628	0.011507
C7	4.12022e-72	1.30602	1.15053e-67
COL23A1	4.11084e-12	1.16359	1.14791e-07
SIRPG	4.08104e-28	2.5961	1.13959e-23
ANKRD13B	4.0751e-13	1.25291	1.13793e-08
RBP1	4.06464e-78	1.01686	1.13501e-73
RP11-598F7.6	4.06429e-24	3.04044	1.13491e-19
EP300-AS1	4.06356e-10	-1.59882	1.13471e-05
RP11-386I14.4	4.06017e-70	2.09174	1.13376e-65
PDGFD	4.05265e-24	1.55618	1.13166e-19
ADAMTSL2	4.04968e-230	3.05424	1.13083e-225
SLC12A8	4.04087e-37	1.95654	1.12837e-32
NHS	4.04046e-35	1.8219	1.12826e-30
ADM2	4.03379e-20	2.50372	1.1264e-15
F3	4.01225e-116	-1.47791	1.12038e-111
DPF3	4.01168e-07	1.30775	0.0112022
CYYR1	4.00872e-27	1.04176	1.1194e-22
NOTCH3	4.00372e-36	1.70339	1.118e-31
SH2D2A	3.99494e-10	1.38761	1.11555e-05
UCN3	3.99208e-36	2.94997	1.11475e-31
MXRA8	3.95429e-221	2.85211	1.1042e-216
DNM1	3.94037e-66	1.95836	1.10031e-61
FOLH1	3.93747e-14	1.41518	1.0995e-09
F2RL3	3.92842e-47	2.36154	1.09697e-42
VMO1	3.92777e-22	-1.1606	1.09679e-17
PLPP4	3.92496e-46	5.37403	1.09601e-41
SEMA7A	3.91557e-25	1.60618	1.09338e-20
SPIN2A	3.91431e-11	1.94841	1.09303e-06
TENM3	3.906e-31	2.0876	1.09071e-26
ITGA1	3.89115e-159	1.23137	1.08656e-154
VTCN1	3.88488e-12	-1.85985	1.08482e-07
FCRL6	3.87962e-11	-1.78077	1.08335e-06
CD70	3.86426e-22	2.52742	1.07906e-17
RP11-768F21.1	3.85319e-13	1.03775	1.07597e-08
GPR153	3.84791e-32	1.32728	1.07449e-27
TPSAB1	3.84768e-32	1.03899	1.07443e-27
WNT2	3.84246e-49	1.87605	1.07297e-44
TNNT2	3.84023e-16	-1.57702	1.07234e-11
HOXA6	3.82559e-29	1.36644	1.06826e-24
HOXB2	3.81432e-63	1.32771	1.06511e-58
ITLN2	3.78106e-16	-2.21332	1.05582e-11
LBH	3.77776e-78	1.21253	1.0549e-73
EPGN	3.77275e-09	-1.69258	0.00010535
P3H3	3.77241e-69	1.99021	1.05341e-64
ANO7	3.77241e-08	1.15574	0.00105341
GPR176	3.7701e-42	1.36829	1.05276e-37
PDCD1	3.76088e-15	2.13515	1.05019e-10
JAM3	3.75632e-108	1.11122	1.04891e-103
MARCKSL1	3.75612e-83	1.26923	1.04886e-78
AC133644.2	3.75557e-43	1.72685	1.0487e-38
DGKA	3.74115e-25	1.36646	1.04468e-20
TMC8	3.73765e-08	1.35322	0.0010437
MCOLN2	3.73754e-11	1.38201	1.04367e-06
ETV4	3.73728e-28	3.07899	1.0436e-23
C1QA	3.732e-39	-1.07833	1.04212e-34
CDH2	3.72241e-20	1.57177	1.03945e-15
CXCL5	3.71896e-59	-2.12688	1.03848e-54
DBH-AS1	3.71704e-27	3.28942	1.03795e-22
TENM4	3.71241e-61	2.67275	1.03665e-56
AC093382.1	3.70887e-10	-1.78448	1.03566e-05
TMEM178B	3.70773e-08	1.4676	0.00103535
NOTUM	3.69716e-33	-1.47413	1.0324e-28
MICALL2	3.69537e-77	1.61608	1.0319e-72
CYP11A1	3.68726e-07	1.1437	0.0102963
PCDHB15	3.68262e-22	1.53438	1.02833e-17
PRIMA1	3.67024e-08	-1.78847	0.00102488
MSMB	3.66317e-12	-2.63631	1.0229e-07
SCN2B	3.66035e-08	1.13958	0.00102212
SMO	3.65043e-41	1.83076	1.01935e-36
RGS7BP	3.64927e-20	1.23967	1.01902e-15
PDGFRA	3.64569e-134	2.25374	1.01802e-129
CLNK	3.64282e-20	4.51544	1.01722e-15
CYP2F1	3.63917e-27	-1.65817	1.0162e-22
HTR2B	3.63775e-29	1.93443	1.0158e-24
PKNOX2	3.63068e-24	1.71686	1.01383e-19
EDA2R	3.62696e-11	1.24773	1.01279e-06
GREB1	3.61437e-07	1.72468	0.0100928
ISLR2	3.61401e-51	3.5746	1.00918e-46
PTGES	3.60186e-17	1.57294	1.00578e-12
RP11-95I16.6	3.59901e-20	-1.72822	1.00499e-15
LGALSL	3.59729e-62	-1.17108	1.00451e-57
VPS37D	3.5945e-11	1.0601	1.00373e-06
TNFRSF25	3.59251e-82	2.32379	1.00317e-77
MSMO1	3.59162e-126	-1.29674	1.00292e-121
HIST1H1A	3.58933e-08	1.7603	0.00100228
ORM2	3.57988e-36	1.65118	9.99646e-32
BEND6	3.57637e-45	1.92496	9.98666e-41
COL11A1	3.57575e-29	4.16853	9.98493e-25
SAMD11	3.56309e-109	2.6061	9.94956e-105
MUC21	3.56188e-59	2.22743	9.94619e-55
RP4-555D20.2	3.55554e-08	-1.20938	0.000992849
HEPH	3.54787e-82	1.76334	9.90706e-78
STON1	3.51304e-28	1.14015	9.80981e-24
MCAM	3.50108e-45	1.03027	9.77641e-41
ZNF667	3.4975e-22	1.0022	9.76643e-18
MMP9	3.49733e-34	1.86118	9.76595e-30
MIR34AHG	3.49581e-07	1.07233	0.00976171
PCP4	3.49374e-47	4.70502	9.75591e-43
RP4-539M6.22	3.48161e-16	2.26809	9.72206e-12
FAM162B	3.47024e-54	1.99047	9.6903e-50
CLEC4E	3.46766e-10	-1.72069	9.68309e-06
CXCL1	3.46231e-110	-1.9726	9.66815e-106
LGI4	3.45133e-17	1.73478	9.63749e-13
GPR34	3.44751e-12	-1.21325	9.62684e-08
NFE2L3	3.43594e-69	1.25811	9.59451e-65
COL8A1	3.42228e-07	1.61772	0.00955638
RP11-707G18.1	3.4154e-13	1.3466	9.53716e-09
F2R	3.41415e-133	2.14425	9.53366e-129
LUCAT1	3.41227e-25	-2.51424	9.52842e-21
NIPAL1	3.40855e-15	-1.44861	9.51804e-11
CAND2	3.39919e-07	1.03344	0.00949191
RP11-394O4.5	3.39775e-68	2.32199	9.48787e-64
HABP2	3.3955e-10	2.76663	9.48159e-06
CCR6	3.39476e-30	2.68215	9.47953e-26
RNASE2	3.38741e-22	4.16267	9.459e-18
COL15A1	3.37262e-159	3.06934	9.4177e-155
FAM118A	3.36948e-29	1.19832	9.40895e-25
HAGHL	3.36791e-11	1.42244	9.40455e-07
ACSM3	3.36566e-11	1.05453	9.39827e-07
DPYD-AS1	3.36468e-13	4.10031	9.39553e-09
ICOS	3.35823e-55	2.50377	9.37752e-51
C6orf223	3.35734e-30	-1.19037	9.37504e-26
CD209	3.35543e-11	-1.3574	9.36971e-07
CALML3	3.34928e-19	2.12474	9.35253e-15
TNNC1	3.33838e-17	-1.12256	9.32208e-13
MZB1	3.33615e-32	2.45412	9.31586e-28
CD22	3.32476e-15	1.89017	9.28406e-11
CILP2	3.31789e-54	4.95753	9.26489e-50
HIGD1B	3.31723e-43	2.06623	9.26304e-39
LXN	3.30855e-25	1.08353	9.23879e-21
HTRA3	3.3e-128	3.21849	9.21491e-124
ZNF208	3.29593e-19	1.09913	9.20355e-15
RP11-513N24.1	3.29277e-32	4.46686	9.19472e-28
SLC18A2	3.29253e-10	1.80485	9.19405e-06
CYP2B6	3.29016e-12	-1.04605	9.18743e-08
EPHA3	3.28692e-52	2.90155	9.17841e-48
AGRP	3.27713e-10	-1.01875	9.15107e-06
CD3D	3.27514e-43	1.02401	9.14551e-39
CNTN6	3.27186e-07	-1.48619	0.00913633
GPX8	3.24518e-137	2.47281	9.06183e-133
NUAK1	3.23672e-50	1.00292	9.0382e-46
IGKC	3.20654e-210	3.0215	8.95395e-206
S100B	3.20223e-18	1.25325	8.94192e-14
CDH15	3.1966e-08	1.54063	0.000892619
SLC22A18	3.19565e-16	1.29873	8.92353e-12
COMP	3.19414e-90	6.30519	8.91931e-86
FBXL7	3.18986e-43	1.02088	8.90736e-39
DDIT4	3.1896e-96	1.35233	8.90663e-92
CD1E	3.18936e-20	2.15804	8.90597e-16
TTN	3.18563e-84	-1.12548	8.89554e-80
GLT8D2	3.17919e-35	1.1589	8.87758e-31
FBLIM1	3.17743e-102	1.74215	8.87264e-98
CACNB2	3.16874e-28	2.81398	8.84839e-24
SBSN	3.16421e-14	2.47999	8.83573e-10
CCL17	3.16406e-78	3.42347	8.83533e-74
CD163	3.16388e-40	-1.17653	8.83483e-36
IL20RA	3.16208e-16	-1.35143	8.82979e-12
CDH6	3.15476e-33	1.85218	8.80936e-29
IL2RA	3.15143e-13	1.23892	8.80006e-09
UBE2C	3.15036e-09	2.07666	8.79705e-05
AZU1	3.14965e-219	6.34703	8.79509e-215
APLNR	3.1398e-42	1.91683	8.76759e-38
SEMA6B	3.1294e-23	1.15467	8.73852e-19
ADAMTS16	3.12933e-47	2.65259	8.73834e-43
GAREM2	3.12853e-25	2.36951	8.73612e-21
SAMD10	3.12751e-08	1.29302	0.000873325
VSNL1	3.12161e-15	1.60852	8.71679e-11
FKBP10	3.11941e-168	2.34899	8.71064e-164
TRABD2B	3.11478e-23	2.00386	8.6977e-19
EDNRA	3.11067e-89	1.90675	8.68625e-85
FOXP3	3.0969e-56	4.27329	8.64778e-52
RP11-44N21.1	3.09219e-08	1.40447	0.000863463
PTHLH	3.0881e-23	1.36626	8.62321e-19
PABPC1L	3.08793e-14	1.30539	8.62273e-10
RHOH	3.08519e-58	2.03285	8.6151e-54
ADAMTS7	3.07906e-69	2.3941	8.59798e-65
SLC2A3	3.06262e-87	1.02926	8.55207e-83
ADAM22	3.05524e-16	1.344	8.53145e-12
TRBC2	3.05058e-154	2.06155	8.51843e-150
MMP1	3.04179e-14	4.16948	8.49389e-10
TTC39C	3.03809e-11	1.04615	8.48356e-07
MSC-AS1	3.0279e-77	2.44507	8.45511e-73
SCGB2A1	3.02731e-44	2.83183	8.45345e-40
PCDH7	3.02729e-40	1.75124	8.45341e-36
TMEM132E	3.02727e-28	4.87032	8.45334e-24
RNF150	3.02459e-21	1.4558	8.44587e-17
SERPINF1	3.01034e-12	1.20566	8.40607e-08
SH2D1B	3.00633e-10	-3.74409	8.39487e-06
HOXC6	3.00103e-11	2.07365	8.38008e-07
PRR16	2.99624e-92	3.2695	8.36669e-88
SPON2	2.99322e-24	1.01968	8.35826e-20
WNT10A	2.96971e-09	1.29613	8.29262e-05
LAMA4	2.96833e-113	1.22969	8.28876e-109
LGI3	2.96825e-88	-1.35665	8.28854e-84
ADAMTS5	2.9676e-25	1.31554	8.28672e-21
NR2F2	2.95631e-49	1.03803	8.25519e-45
NCR3LG1	2.92874e-08	-1.75586	0.000817822
SLIT2	2.92349e-42	1.01719	8.16356e-38
ROBO1	2.92218e-70	1.91687	8.1599e-66
ARHGAP28	2.92085e-48	1.41537	8.15619e-44
PCDHB4	2.92023e-16	1.01614	8.15445e-12
CD79B	2.91452e-39	1.95274	8.13852e-35
RNF152	2.91403e-66	1.95645	8.13715e-62
PTCH2	2.91277e-10	1.34562	8.13361e-06
CHRD	2.91171e-37	1.8257	8.13067e-33
PCDHA10	2.90337e-22	1.40753	8.10736e-18
ZEB1	2.90055e-116	1.30231	8.0995e-112
HGF	2.89428e-104	1.96115	8.08199e-100
RP1-34H18.1	2.88649e-13	1.11632	8.06023e-09
CAMP	2.88573e-17	-2.59735	8.05812e-13
UNC5CL	2.87941e-10	1.14281	8.04047e-06
MKI67	2.87878e-24	2.3798	8.03869e-20
HSD11B1	2.87333e-60	1.78829	8.02348e-56
FATE1	2.86412e-27	2.87831	7.99778e-23
WISP1	2.86142e-90	4.34757	7.99023e-86
MICAL3	2.8606e-57	1.2129	7.98795e-53
FCMR	2.85153e-07	1.29435	0.00796262
SEMA3E	2.84368e-16	-1.48523	7.9407e-12
AC005754.8	2.84037e-09	1.88034	7.93145e-05
NECAB1	2.83977e-104	-1.50141	7.92976e-100
KIAA1755	2.83834e-85	3.89953	7.92578e-81
FMO1	2.83136e-31	2.99085	7.90629e-27
ITM2C	2.82972e-38	1.09632	7.90172e-34
PNMAL2	2.82198e-07	1.17819	0.00788009
DOK5	2.81096e-45	1.83718	7.84931e-41
FFAR2	2.79147e-07	-1.62366	0.00779491
IL23A	2.78603e-14	2.17686	7.77971e-10
TLR7	2.77547e-17	-1.74137	7.75022e-13
KCNE4	2.77326e-89	2.13595	7.74406e-85
HBZ	2.76823e-07	1.76086	0.00772999
CBLN3	2.7644e-09	1.99646	7.71931e-05
IGFBP3	2.75361e-34	1.36483	7.68918e-30
LRRC4	2.74937e-74	-1.63546	7.67733e-70
MUM1L1	2.74728e-11	-2.05165	7.6715e-07
RAB3A	2.7295e-09	1.19205	7.62184e-05
ZNF519	2.72083e-14	1.00605	7.59765e-10
KRT15	2.7094e-61	1.63715	7.56572e-57
MARCO	2.70364e-82	-1.71244	7.54964e-78
C11orf97	2.70048e-10	-1.75793	7.54082e-06
PARD6B	2.69041e-98	-1.11355	7.5127e-94
LILRB1	2.69018e-15	-1.11743	7.51205e-11
DPYSL3	2.69017e-79	1.23833	7.51203e-75
SCN9A	2.68502e-30	-1.06229	7.49766e-26
SPRR3	2.68501e-47	1.70778	7.49763e-43
RHCG	2.67351e-14	1.4618	7.4655e-10
PCSK9	2.66756e-79	-1.72915	7.44891e-75
LAMC3	2.66545e-71	2.98785	7.44299e-67
CDK1	2.6629e-07	1.34923	0.00743588
CDYL2	2.645e-12	1.0305	7.38591e-08
UCK2	2.64292e-23	1.04194	7.38008e-19
HHIP	2.63939e-95	-1.37101	7.37023e-91
DSCC1	2.63925e-17	1.01197	7.36983e-13
TSHZ2	2.63213e-104	1.66096	7.34996e-100
OLFML2B	2.62891e-21	1.21126	7.34097e-17
VSTM4	2.62226e-36	1.16548	7.3224e-32
THSD7B	2.62071e-63	5.55345	7.31808e-59
FHL5	2.62017e-18	1.01078	7.31658e-14
CTD-2369P2.8	2.61588e-09	-1.01673	7.30458e-05
RP11-483L5.1	2.61571e-07	1.8233	0.00730412
RAMP1	2.60905e-53	1.52872	7.28552e-49
RP11-736N17.10	2.5948e-08	1.13329	0.000724571
COL5A2	2.59359e-237	4.20835	7.24234e-233
KIAA1644	2.59234e-15	3.01224	7.23885e-11
ST3GAL4-AS1	2.59009e-20	1.30842	7.23258e-16
REEP1	2.58003e-08	-1.28442	0.000720447
SFRP2	2.57614e-60	1.36403	7.19362e-56
CACNA2D1	2.57396e-69	1.71663	7.18753e-65
HSPG2	2.56854e-76	1.77454	7.17238e-72
P4HA3	2.56657e-31	1.30946	7.1669e-27
ARFGEF3	2.5616e-143	-1.12406	7.15301e-139
MEG3	2.55701e-78	1.11401	7.1402e-74
PODNL1	2.54776e-117	3.8248	7.11437e-113
CHIT1	2.53257e-30	3.16756	7.07195e-26
COL22A1	2.53161e-15	2.46177	7.06926e-11
VASH2	2.53086e-43	1.94071	7.06717e-39
CLIP3	2.52784e-76	2.28472	7.05873e-72
LINC00632	2.51469e-07	1.36324	0.00702203
GGT5	2.49323e-49	1.5346	6.9621e-45
PRMT8	2.49261e-14	-1.18289	6.96036e-10
CLEC5A	2.48558e-36	2.18061	6.94074e-32
SLC7A2	2.48495e-60	-1.30064	6.93897e-56
SNAP25	2.4838e-32	1.91666	6.93576e-28
SALL4	2.4764e-21	2.46015	6.91511e-17
TMEM190	2.47045e-09	-1.41887	6.89849e-05
SULT2B1	2.46677e-24	-1.38542	6.88821e-20
ANO1	2.46334e-69	1.70478	6.87864e-65
GNAL	2.46091e-18	1.11525	6.87185e-14
TMSB15B	2.45436e-11	1.58498	6.85354e-07
OMD	2.45383e-32	1.15682	6.85207e-28
GRM8	2.4474e-14	1.85885	6.83411e-10
COX4I2	2.44518e-30	1.90952	6.82793e-26
NKX3-1	2.44293e-11	-1.08161	6.82163e-07
HIST3H2A	2.44286e-11	1.20479	6.82143e-07
KRT16	2.44175e-12	2.0526	6.81834e-08
CD27	2.43068e-68	2.89394	6.78742e-64
FXYD2	2.42926e-09	1.10119	6.78346e-05
SYNJ2	2.42764e-35	1.22555	6.77893e-31
ARSI	2.42332e-56	2.34547	6.76687e-52
FAM83D	2.42141e-07	1.81234	0.00676155
COL10A1	2.42008e-255	7.95398	6.75784e-251
PAPLN	2.41761e-89	2.92686	6.75093e-85
FLT1	2.41198e-28	1.83869	6.73521e-24
CDR1-AS	2.39977e-48	2.02946	6.7011e-44
IGLC2	2.39571e-216	2.41754	6.68979e-212
HMGCLL1	2.38094e-19	1.14522	6.64855e-15
BDNF	2.37982e-08	-1.77705	0.00066454
CASC15	2.3798e-90	1.71338	6.64535e-86
HTR1F	2.37019e-10	2.33453	6.61851e-06
LINC00176	2.36784e-08	1.3486	0.000661195
TMEM200C	2.36637e-19	2.17263	6.60786e-15
AC017002.1	2.3636e-21	2.32755	6.60012e-17
ANGPTL2	2.35926e-122	2.06017	6.58801e-118
NCAM2	2.35193e-78	1.99936	6.56753e-74
GLI1	2.34727e-50	2.73712	6.55453e-46
CHI3L2	2.34573e-21	-1.22744	6.55022e-17
RP11-7K24.3	2.34049e-14	-2.34015	6.53557e-10
CRMP1	2.33908e-74	2.02012	6.53164e-70
TRAT1	2.33822e-14	1.67367	6.52926e-10
MEOX1	2.33204e-18	2.8846	6.51198e-14
RP11-722G7.1	2.32007e-10	1.4787	6.47856e-06
HS3ST3B1	2.31382e-12	1.2121	6.46112e-08
PRDM6	2.29913e-86	2.24893	6.42008e-82
ADGRG2	2.28794e-39	3.93268	6.38884e-35
LA16c-349E10.1	2.28372e-07	2.59197	0.00637707
RP1-79C4.4	2.2802e-74	2.59566	6.36723e-70
HIST1H2BD	2.27915e-13	1.20452	6.36429e-09
PLXDC2	2.27799e-41	1.18946	6.36106e-37
TPSB2	2.2742e-93	1.25933	6.35048e-89
KCNJ2-AS1	2.26944e-10	1.1967	6.33719e-06
ITK	2.26772e-07	1.01128	0.00633239
FAM171B	2.26636e-53	1.06762	6.32858e-49
CSF3	2.26375e-101	-2.70538	6.32129e-97
PRTFDC1	2.26079e-44	1.2239	6.31302e-40
OLFML3	2.25811e-83	1.02791	6.30554e-79
CCDC36	2.25788e-19	1.01315	6.30489e-15
S1PR5	2.24577e-13	-2.1419	6.27108e-09
BMPR1B	2.2429e-19	-1.38674	6.26308e-15
SNAI1	2.23283e-43	1.29407	6.23495e-39
CXCL6	2.2297e-14	-1.17958	6.22623e-10
SRRM4	2.22096e-13	-2.44013	6.2018e-09
ANKRD1	2.21737e-07	-1.18902	0.00619178
CSPG5	2.21391e-22	1.84751	6.18212e-18
FAM20C	2.21147e-28	1.28507	6.17532e-24
FAM160A1	2.20835e-12	-1.25195	6.1666e-08
MYBL1	2.2071e-07	-1.0318	0.00616312
KIF7	2.20223e-13	1.20519	6.14952e-09
C1QTNF7	2.19863e-41	1.09233	6.13944e-37
LINGO1	2.19673e-25	2.35479	6.13416e-21
NPTX2	2.19661e-14	2.70414	6.13382e-10
SGIP1	2.19385e-141	2.24566	6.1261e-137
POT1-AS1	2.18816e-12	1.3674	6.11023e-08
VSIG4	2.18152e-37	-1.03127	6.09167e-33
PPBP	2.17665e-39	-4.49339	6.07808e-35
SUGCT	2.17539e-45	2.75365	6.07455e-41
CD1C	2.17266e-16	2.47656	6.06693e-12
HAAO	2.16227e-20	1.2484	6.03792e-16
RP11-79H23.3	2.15812e-32	-2.24516	6.02634e-28
NRXN2	2.15728e-45	2.75001	6.024e-41
IGHG1	2.15681e-233	2.54573	6.02266e-229
CLDN2	2.1568e-29	1.35611	6.02264e-25
RP11-398E10.1	2.15583e-07	1.35001	0.00601994
TNFRSF13B	2.15292e-21	4.50804	6.0118e-17
RERG	2.14997e-56	1.11186	6.00357e-52
FAM159A	2.14935e-08	2.02853	0.000600183
SLC22A31	2.13812e-49	1.2451	5.9705e-45
NR2F1	2.13435e-111	1.97185	5.95995e-107
UBASH3A	2.13145e-12	2.31397	5.95186e-08
TNFSF11	2.12795e-22	2.93699	5.9421e-18
CLEC10A	2.12794e-08	-1.10753	0.000594205
TNFRSF13C	2.12702e-48	4.68861	5.93948e-44
KIRREL	2.12463e-108	1.78667	5.93283e-104
EPHX4	2.11465e-22	1.54458	5.90495e-18
FAP	2.10649e-217	4.29185	5.88217e-213
RP11-125O18.1	2.10274e-24	2.10388	5.87168e-20
MMP11	2.10171e-199	7.61403	5.86882e-195
LOXL4	2.09885e-11	1.64243	5.86082e-07
RGS4	2.09792e-34	2.44247	5.85822e-30
CTD-2313J17.6	2.08741e-23	-1.02046	5.82887e-19
TRAF1	2.0862e-26	1.19535	5.82551e-22
CALD1	2.08549e-110	1.51417	5.82353e-106
RARB	2.08513e-35	1.43467	5.82253e-31
CXCL3	2.08234e-64	-1.02825	5.81472e-60
ELN	2.07812e-46	1.46336	5.80293e-42
ROBO2	2.07314e-93	2.41665	5.78904e-89
NFE2	2.0676e-10	1.01535	5.77357e-06
ADIRF	2.06452e-234	-1.125	5.76497e-230
EGFLAM	2.04931e-38	3.07225	5.72248e-34
GPR20	2.03399e-21	1.93556	5.67972e-17
C6orf132	2.02699e-37	-1.29542	5.66017e-33
CCDC173	2.02435e-11	-1.03846	5.65279e-07
DPT	2.02371e-49	1.37916	5.65101e-45
CST1	2.02293e-78	12.9008	5.64882e-74
MT1G	2.01889e-167	-4.24127	5.63755e-163
NREP	2.01796e-48	1.15472	5.63496e-44
PSRC1	2.01327e-11	1.83041	5.62185e-07
MIR155HG	2.01157e-33	1.75518	5.61712e-29
FIBCD1	2.00849e-15	1.65457	5.60851e-11
CCR7	2.00825e-107	3.99022	5.60784e-103
SNHG9	1.99927e-31	1.29052	5.58276e-27
CTHRC1	1.99498e-223	4.91522	5.57077e-219
SNED1	1.99306e-16	1.04511	5.56541e-12
NKX2-8	1.98889e-18	-1.89882	5.55378e-14
SPRY1	1.98449e-56	1.078	5.54148e-52
SLC16A2	1.98249e-63	1.59071	5.53591e-59
AC109642.1	1.9824e-27	1.43322	5.53565e-23
RP11-486O12.2	1.9819e-07	1.01812	0.00553426
TEX41	1.98055e-19	1.87237	5.5305e-15
SFRP4	1.9786e-64	2.80318	5.52505e-60
LRRC17	1.97428e-53	1.65738	5.51297e-49
SYTL2	1.9723e-49	1.18507	5.50745e-45
CYTH3	1.97151e-55	1.16848	5.50524e-51
HSD17B13	1.9601e-14	-1.02103	5.47337e-10
PRRX2	1.95522e-31	1.41538	5.45974e-27
CD40LG	1.95107e-13	1.65871	5.44817e-09
SCNN1D	1.94641e-07	2.0774	0.00543517
SLITRK5	1.94201e-11	1.03775	5.42286e-07
CLEC11A	1.93794e-93	1.84296	5.41149e-89
KIF20A	1.93682e-12	1.71822	5.40837e-08
ITGA7	1.93561e-14	1.20663	5.40499e-10
PGF	1.93338e-92	3.03231	5.39878e-88
NID1	1.92976e-158	2.4398	5.38866e-154
PCSK2	1.92484e-25	1.69497	5.37491e-21
CTD-2544N14.3	1.92136e-12	1.24166	5.36519e-08
PDZRN3	1.92099e-95	1.916	5.36417e-91
CDH11	1.91834e-163	2.62178	5.35676e-159
HAPLN3	1.9139e-86	1.62357	5.34436e-82
SPX	1.91181e-07	1.38992	0.00533853
SCGB1A1	1.90926e-51	-1.65437	5.33141e-47
IL4I1	1.90583e-33	1.72761	5.32183e-29
FABP3	1.90492e-17	-1.08215	5.31929e-13
AFAP1-AS1	1.90325e-36	4.39289	5.31464e-32
MT2A	1.90057e-108	-1.03953	5.30714e-104
METAP1D	1.89484e-12	1.02671	5.29115e-08
VWA3A	1.8927e-07	-1.50334	0.00528518
MAL	1.89195e-27	1.31989	5.28309e-23
PIK3R6	1.88931e-08	1.00706	0.00052757
SPARC	1.88721e-125	1.9796	5.26984e-121
GPR3	1.88219e-10	2.43278	5.25583e-06
TBX5	1.87929e-135	2.63037	5.24772e-131
SPIB	1.87699e-20	2.18602	5.24132e-16
S100A12	1.87305e-20	-4.07432	5.23029e-16
PHLDB3	1.87156e-17	1.0474	5.22614e-13
FKBP7	1.86929e-73	1.28242	5.2198e-69
LSAMP	1.8663e-76	1.97537	5.21145e-72
TNFRSF4	1.86487e-171	2.44138	5.20745e-167
ENC1	1.86001e-14	1.25732	5.1939e-10
RP11-333A23.4	1.85987e-10	-2.85116	5.1935e-06
LRFN5	1.85829e-22	1.59411	5.1891e-18
C2orf54	1.85809e-12	-1.38581	5.18852e-08
LEF1	1.8543e-169	3.4226	5.17795e-165
DUSP4	1.85e-25	1.33126	5.16594e-21
ADAMTS10	1.84354e-35	1.16002	5.1479e-31
AHSP	1.83813e-16	1.85142	5.13278e-12
GFRA2	1.83756e-19	-2.02606	5.13119e-15
MEOX2	1.83742e-58	1.89135	5.13081e-54
IGFL2	1.83053e-42	4.95249	5.11157e-38
OLFM2	1.83024e-60	2.03308	5.11077e-56
PCDHB7	1.82636e-17	1.37611	5.09992e-13
ECM1	1.81887e-62	1.48686	5.07901e-58
BICC1	1.81647e-119	2.28963	5.07232e-115
NETO2	1.81602e-18	1.00297	5.07106e-14
CXCL13	1.81501e-42	4.31872	5.06824e-38
LILRB5	1.81394e-25	-1.94254	5.06524e-21
DACT1	1.8125e-90	2.38676	5.06122e-86
PTGDS	1.81058e-39	1.19423	5.05585e-35
UPK3A	1.80958e-17	3.10731	5.05307e-13
LUM	1.80445e-191	2.51674	5.03876e-187
ITGA8	1.79986e-82	1.09334	5.02593e-78
LTBP2	1.795e-73	2.2757	5.01235e-69
CYP46A1	1.79463e-18	1.58833	5.01133e-14
KLRF1	1.78705e-21	-1.93401	4.99016e-17
MESP1	1.78526e-08	1.07097	0.000498516
CYP4F35P	1.78346e-07	1.60607	0.00498014
MIR503HG	1.78164e-27	1.25504	4.97506e-23
NALCN	1.77391e-59	3.36124	4.95347e-55
METTL12	1.7676e-52	1.50528	4.93584e-48
KDELR3	1.76496e-98	2.01296	4.92847e-94
CLCNKB	1.76323e-11	2.15819	4.92366e-07
TMEM132C	1.76055e-08	1.80767	0.000491616
LINC00310	1.75791e-08	1.12698	0.000490878
TIMP1	1.75757e-251	2.34363	4.90785e-247
ORM1	1.74966e-46	1.34809	4.88575e-42
CYP7B1	1.74811e-58	1.77481	4.88142e-54
DNAJC22	1.74541e-35	2.67397	4.87388e-31
TRIL	1.74269e-20	1.1638	4.8663e-16
SLC16A1-AS1	1.73991e-33	1.01263	4.85851e-29
FAT4	1.73976e-73	1.27308	4.85811e-69
IGHM	1.7396e-93	3.42014	4.85767e-89
RP11-354E11.2	1.73351e-08	1.68089	0.000484066
RP11-439L18.1	1.73299e-07	-2.29856	0.0048392
KIR2DL3	1.73299e-09	-4.04661	4.83919e-05
ADD2	1.72866e-10	1.26208	4.82711e-06
GNAO1	1.71687e-21	2.39783	4.7942e-17
FAM19A5	1.71685e-32	1.0111	4.79414e-28
LRRN2	1.71434e-07	1.28894	0.00478711
PYCR1	1.71242e-42	1.79791	4.78177e-38
SCN7A	1.71087e-123	1.21624	4.77743e-119
AFAP1	1.70896e-91	1.50844	4.77209e-87
RGS5	1.70718e-47	2.31848	4.76712e-43
MS4A1	1.7041e-105	3.90388	4.75853e-101
HBG2	1.70279e-64	1.60909	4.75488e-60
HOMER1	1.70144e-14	-1.16004	4.7511e-10
TMEM233	1.70014e-26	1.27765	4.74748e-22
CD3E	1.69692e-38	1.36951	4.73849e-34
HMCN1	1.69532e-219	2.31901	4.73401e-215
GAS7	1.69454e-19	1.1082	4.73183e-15
FCGR3B	1.69423e-15	-2.90247	4.73097e-11
C4orf46	1.69062e-07	1.07369	0.00472088
VNN2	1.68719e-06	-1.1597	0.0471132
CD200	1.68316e-73	1.38823	4.70004e-69
KCNJ2	1.67864e-30	1.40289	4.68744e-26
COLEC11	1.67717e-12	1.30366	4.68334e-08
BMP5	1.67661e-56	1.57377	4.68176e-52
SULF1	1.67599e-97	2.93888	4.68004e-93
STOX1	1.6743e-06	-1.25456	0.0467532
SYNDIG1L	1.66644e-14	-1.10911	4.65336e-10
COL4A2	1.6663e-146	2.15156	4.65298e-142
FABP4	1.65905e-175	-2.14157	4.63273e-171
LIMD2	1.65885e-95	1.47887	4.63218e-91
GLI2	1.65034e-80	2.85411	4.60841e-76
GS1-600G8.5	1.64972e-13	-1.79578	4.60667e-09
SPOCK1	1.64903e-18	1.67268	4.60476e-14
FOXS1	1.64484e-67	2.51548	4.59305e-63
CCR4	1.64479e-11	1.95202	4.59292e-07
VPREB3	1.64381e-28	3.58794	4.59017e-24
RP11-89C3.4	1.64342e-08	1.006	0.00045891
TBX5-AS1	1.64296e-65	2.05455	4.58781e-61
SLC6A14	1.64295e-59	-1.18328	4.58778e-55
LINC00578	1.63491e-19	1.35917	4.56534e-15
DCLK1	1.62868e-40	1.59315	4.54792e-36
LDLR	1.62768e-192	-1.04513	4.54514e-188
HBM	1.61348e-14	1.55769	4.5055e-10
SLC16A14	1.61136e-46	1.67321	4.49956e-42
PSTPIP1	1.61131e-07	1.03182	0.00449942
ANKUB1	1.60545e-07	-1.41355	0.00448305
CDH8	1.6014e-12	1.50566	4.47175e-08
P3H4	1.60125e-51	1.35195	4.47132e-47
FSIP2	1.59823e-07	1.03791	0.0044629
COL3A1	1.59694e-268	4.952	4.45929e-264
APLP1	1.59291e-09	1.25968	4.44805e-05
GFRA1	1.59109e-24	1.44384	4.44297e-20
TYRP1	1.58953e-48	3.02018	4.43859e-44
WNT11	1.58912e-22	1.50695	4.43745e-18
CAV1	1.58113e-13	-1.16008	4.41514e-09
LY9	1.57712e-18	2.25602	4.40395e-14
ASPM	1.57316e-13	1.95121	4.39289e-09
IL17RD	1.57184e-08	1.19068	0.000438921
SDK2	1.57172e-34	1.75525	4.38886e-30
GJB2	1.56929e-17	2.39893	4.38208e-13
SLC6A4	1.56525e-18	-1.06139	4.3708e-14
ADCY3	1.55787e-29	1.29067	4.3502e-25
C9orf135	1.55647e-13	-1.2271	4.3463e-09
BASP1	1.55348e-97	1.49513	4.33795e-93
SSC5D	1.5498e-92	2.43496	4.32767e-88
CENPF	1.53617e-16	1.57072	4.28961e-12
CCNE2	1.5328e-06	1.03442	0.042802
LRRC36	1.53275e-83	-1.0797	4.28005e-79
HMOX1	1.53138e-77	-1.97006	4.27622e-73
RP11-254I22.3	1.53025e-09	2.01794	4.27306e-05
CHPF	1.52732e-35	1.18674	4.26489e-31
RP1-137D17.1	1.52723e-27	3.42742	4.26464e-23
S1PR3	1.5242e-25	2.0041	4.25618e-21
DERL3	1.52415e-34	3.08737	4.25605e-30
KCNK12	1.52268e-16	2.80896	4.25194e-12
AK7	1.52166e-30	-1.05228	4.24907e-26
CCL11	1.51865e-27	1.52725	4.24067e-23
PSAT1	1.51843e-15	1.72443	4.24007e-11
HIST2H2BE	1.51734e-14	1.23153	4.23703e-10
THBS2	1.51557e-209	4.57915	4.23209e-205
MRVI1	1.51375e-55	1.35263	4.22699e-51
COL14A1	1.51353e-98	2.09025	4.22638e-94
IGHG2	1.51309e-25	3.83385	4.22515e-21
SNHG25	1.50241e-87	1.52805	4.19534e-83
FOXF2	1.50171e-103	1.89881	4.19337e-99
MME	1.49851e-19	-1.46197	4.18444e-15
CD19	1.49743e-21	3.38376	4.18142e-17
MESP2	1.49453e-06	2.81617	0.0417332
SCAMP5	1.49105e-11	1.36524	4.16361e-07
SLC16A7	1.48585e-22	1.06026	4.14908e-18
FAM198B	1.48542e-33	1.06415	4.14789e-29
COL1A1	1.48174e-73	4.30269	4.1376e-69
HOXC4	1.47378e-08	1.14978	0.000411539
CD300A	1.4716e-17	-1.09739	4.1093e-13
CX3CR1	1.46927e-35	-2.79846	4.1028e-31
MIAT	1.46778e-14	1.02312	4.09863e-10
CACNA1C	1.46515e-127	2.42757	4.09127e-123
IGLL5	1.46091e-21	3.74246	4.07945e-17
GPX2	1.46053e-09	2.77618	4.07838e-05
ZBED2	1.45789e-06	-1.73892	0.0407101
ANGPT1	1.45623e-75	1.30612	4.06639e-71
PLAT	1.45603e-216	1.94126	4.06582e-212
ADAMDEC1	1.45492e-14	2.32186	4.06271e-10
MDK	1.4547e-96	1.31825	4.06211e-92
PTP4A3	1.45411e-34	1.10441	4.06044e-30
GPC6	1.45371e-27	1.40749	4.05933e-23
EVC	1.45258e-11	1.10814	4.05618e-07
AFAP1L2	1.44801e-54	2.08544	4.04343e-50
IKBKE	1.4449e-06	1.05103	0.0403474
MAST2	1.44035e-10	1.07727	4.02203e-06
SMCO3	1.43536e-15	1.02594	4.00809e-11
HIST1H2AE	1.43329e-07	1.07031	0.00400233
NPTXR	1.43146e-08	1.00838	0.00039972
PALM2	1.42772e-14	1.32388	3.98678e-10
RP11-1055B8.9	1.42126e-24	1.32307	3.96873e-20
IL21R	1.4194e-09	1.07903	3.96353e-05
ODAM	1.41732e-22	-1.38669	3.95771e-18
UCHL1	1.41427e-40	1.54857	3.9492e-36
EXOC3L4	1.41326e-21	1.97986	3.94639e-17
LILRA5	1.41119e-14	-1.77209	3.94061e-10
PRRX1	1.41067e-198	2.69327	3.93914e-194
TBX21	1.40875e-10	-1.27176	3.93379e-06
MAP1A	1.40708e-76	1.89172	3.92914e-72
DNM3OS	1.40579e-114	2.58338	3.92552e-110
SOCS1	1.40532e-35	1.09245	3.92422e-31
IGHD	1.40473e-13	2.30797	3.92257e-09
C2CD4A	1.40394e-11	1.36184	3.92035e-07
PIWIL4	1.40216e-10	1.4913	3.9154e-06
COL5A1	1.40104e-254	4.11605	3.91225e-250
AARD	1.40087e-06	1.28534	0.039118
CD28	1.39952e-34	2.74378	3.90802e-30
PGM5P2	1.39565e-09	-1.37817	3.8972e-05
NEGR1	1.39483e-36	1.44021	3.89493e-32
LINC01436	1.39433e-07	1.83177	0.00389352
SOSTDC1	1.38795e-10	-1.16441	3.87571e-06
TIGIT	1.38381e-26	1.43196	3.86415e-22
UNC5B	1.38374e-64	1.30309	3.86395e-60
GAS6-AS1	1.3804e-07	1.45084	0.00385463
JAK3	1.37764e-76	1.63371	3.84692e-72
SCG2	1.37636e-19	3.16813	3.84333e-15
SARDH	1.37228e-21	2.01046	3.83196e-17
DNASE2B	1.37209e-07	-1.90544	0.00383143
RP11-522B15.3	1.36941e-10	1.66456	3.82394e-06
FHOD3	1.36688e-06	1.11773	0.0381688
SPRR2A	1.36685e-19	1.4967	3.8168e-15
C2orf27B	1.36379e-24	2.60977	3.80823e-20
HOXB3	1.36155e-101	1.93626	3.802e-97
PLA2G7	1.35284e-07	1.51986	0.00377767
FNDC1	1.34894e-68	2.63948	3.76679e-64
CD69	1.34595e-174	1.97839	3.75842e-170
PRELP	1.34266e-65	1.18298	3.74924e-61
BRSK1	1.33458e-09	1.33441	3.72667e-05
PTH1R	1.33256e-32	1.4173	3.72105e-28
RAB33A	1.33203e-07	1.27588	0.00371957
BAAT	1.32967e-14	4.08144	3.71296e-10
RP11-2E11.9	1.32234e-07	1.46011	0.00369249
SLC7A11	1.32009e-23	-1.28453	3.68623e-19
GLB1L3	1.31623e-42	4.76042	3.67545e-38
CCL22	1.31366e-19	3.08719	3.66826e-15
EVA1B	1.31309e-68	1.05985	3.66669e-64
PTCRA	1.30979e-08	-3.55141	0.000365745
TMEM200A	1.30628e-85	2.44499	3.64765e-81
REM1	1.30582e-30	1.66947	3.64636e-26
NFASC	1.30524e-40	1.20513	3.64474e-36
FSTL1	1.30488e-105	1.54015	3.64375e-101
ATP8B2	1.30299e-39	1.12314	3.63847e-35
LUZP2	1.30142e-34	4.47874	3.63409e-30
LGR4	1.30075e-24	1.28678	3.63223e-20
MFGE8	1.30032e-141	1.45149	3.631e-137
ADCY1	1.29516e-34	2.03958	3.6166e-30
VENTX	1.29492e-08	-1.18087	0.000361593
AL589743.1	1.29427e-07	1.37593	0.00361412
RASGRF2	1.29372e-58	1.68995	3.61258e-54
LIPG	1.29341e-21	1.58157	3.61171e-17
STEAP1	1.29234e-40	1.77724	3.60873e-36
C16orf59	1.28954e-08	1.53828	0.000360091
ITGB2-AS1	1.28675e-14	1.86293	3.59311e-10
DUSP15	1.28481e-31	1.44271	3.58771e-27
CD160	1.28335e-06	-1.96851	0.0358361
IGFBP7	1.28273e-128	1.54667	3.5819e-124
MMP15	1.28074e-16	1.12274	3.57633e-12
HSPA12A	1.2807e-39	1.66474	3.57622e-35
COL6A5	1.28031e-64	2.414	3.57513e-60
GZMH	1.27919e-30	-1.81606	3.57201e-26
MGAT3	1.27855e-09	-1.44887	3.57021e-05
GPR87	1.27768e-11	-2.84794	3.56778e-07
BLK	1.27528e-17	3.54295	3.56111e-13
MIR3142HG	1.27368e-08	2.05075	0.000355664
SEPT4	1.27248e-75	1.31858	3.55326e-71
TMEM132A	1.26776e-71	1.4109	3.54008e-67
CAMK1G	1.26693e-25	2.73078	3.53777e-21
GUCY1A2	1.26488e-120	3.01485	3.53205e-116
TINCR	1.26262e-06	-2.00381	0.0352575
TFPI2	1.25654e-09	-1.04807	3.50877e-05
AC003991.3	1.25634e-17	-1.70364	3.50822e-13
POPDC3	1.2563e-09	-1.89984	3.50809e-05
FCER2	1.25546e-18	2.87549	3.50576e-14
TMPRSS6	1.25482e-08	1.39127	0.000350395
ACHE	1.25357e-43	1.6771	3.50046e-39
IL6	1.25324e-06	-1.24601	0.0349955
EXD1	1.25252e-08	-1.98369	0.000349755
MT1H	1.25045e-22	-3.05925	3.49175e-18
PXDN	1.24399e-91	1.44141	3.47371e-87
EGLN3	1.24349e-153	2.92113	3.47233e-149
NCS1	1.24338e-32	1.10006	3.47202e-28
FBN1	1.23779e-122	1.84994	3.4564e-118
PDGFRB	1.23472e-156	2.50597	3.44782e-152
MT1F	1.23339e-57	-1.58086	3.44412e-53
ASPHD1	1.23257e-25	1.99579	3.44184e-21
WBSCR17	1.23207e-37	2.44374	3.44043e-33
CCDC141	1.23059e-60	-1.01318	3.4363e-56
LY6D	1.22825e-17	1.9118	3.42976e-13
ABCA6	1.22651e-32	1.1711	3.4249e-28
ROR2	1.22254e-59	2.39659	3.41382e-55
RP11-386G11.5	1.21987e-06	1.28848	0.0340636
RYR2	1.21814e-80	2.32959	3.40153e-76
NAV3	1.21793e-40	1.25312	3.40095e-36
PLA2G4E	1.2124e-31	2.39334	3.38551e-27
SULT1C2	1.20896e-36	1.32668	3.37589e-32
MMP13	1.20855e-10	3.8602	3.37475e-06
KLK10	1.20687e-28	-1.10575	3.37007e-24
STMN3	1.20581e-79	1.59561	3.3671e-75
HBB	1.20316e-67	1.5986	3.35971e-63
CTSG	1.20278e-56	1.76124	3.35864e-52
LINC00205	1.20202e-09	1.1371	3.35653e-05
ATHL1	1.2014e-31	1.35131	3.35479e-27
CXCL8	1.20004e-70	-1.42333	3.35101e-66
IRS1	1.20003e-49	1.52148	3.35096e-45
SPRR2E	1.19858e-08	1.87925	0.000334691
HIST2H2BF	1.19772e-12	1.43591	3.3445e-08
RASGRP3	1.19679e-33	1.2551	3.34193e-29
CCDC144NL-AS1	1.19621e-17	1.21511	3.34029e-13
PRF1	1.19429e-23	-1.74716	3.33494e-19
TSHZ3	1.19106e-35	1.08601	3.32591e-31
ANTXR1	1.1899e-16	1.28813	3.32267e-12
RCN3	1.187e-72	1.6763	3.31458e-68
FHL3	1.18517e-45	1.08141	3.30946e-41
HOXB5	1.18466e-56	1.03841	3.30805e-52
HOXB4	1.18315e-82	1.78382	3.30383e-78
MT1X	1.17932e-135	-2.27638	3.29313e-131
GFPT2	1.17811e-32	1.05627	3.28976e-28
CHN1	1.17748e-92	2.16698	3.28801e-88
EGOT	1.17648e-20	1.4214	3.28521e-16
ZWINT	1.1751e-08	1.22732	0.000328136
STRA6	1.17235e-45	4.12522	3.27367e-41
SNAI2	1.17132e-46	1.52039	3.27078e-42
NKD1	1.17092e-17	1.13523	3.26968e-13
FAM171A2	1.17065e-40	2.14642	3.26893e-36
RP11-674P19.2	1.16803e-25	2.43809	3.26161e-21
UNC5C	1.16795e-74	2.04778	3.26137e-70
SLC52A1	1.16432e-06	1.80122	0.0325124
CXCR6	1.16358e-11	1.47469	3.24919e-07
ELFN1	1.16341e-33	2.68774	3.2487e-29
RP11-511P7.5	1.16307e-08	1.00983	0.000324777
SBSPON	1.1622e-06	-1.40763	0.0324533
B3GAT1	1.15618e-06	-2.67206	0.0322852
SHC3	1.15561e-51	-1.14135	3.22694e-47
AC140912.1	1.15256e-27	1.81306	3.2184e-23
COL5A3	1.1502e-73	2.17531	3.21181e-69
CCL19	1.14781e-122	5.80528	3.20514e-118
SAMSN1	1.14711e-35	1.1891	3.20318e-31
CCR10	1.14144e-16	1.39964	3.18736e-12
PHYHIPL	1.13501e-22	2.35544	3.16939e-18
SRPX2	1.1326e-75	2.55541	3.16268e-71
AMPH	1.13155e-14	1.18362	3.15973e-10
CPXM1	1.13023e-94	2.55357	3.15605e-90
FNDC4	1.12532e-28	1.11808	3.14236e-24
MGP	1.12438e-89	1.5719	3.13971e-85
LAMP5	1.12405e-71	3.93528	3.1388e-67
WIF1	1.1228e-241	-2.5582	3.13531e-237
RASEF	1.12122e-84	-1.16812	3.13088e-80
IGHA1	1.11464e-260	3.64935	3.11251e-256
NLGN2	1.11406e-39	1.52296	3.1109e-35
MIR3945HG	1.113e-14	-1.98677	3.10793e-10
PTGDR	1.11049e-09	-2.61044	3.10094e-05
RHBDL1	1.11005e-12	1.94042	3.09971e-08
FRMD6	1.1087e-65	1.62371	3.09592e-61
P2RY8	1.10866e-09	1.20477	3.09583e-05
CD34	1.10693e-57	1.3206	3.09099e-53
CNKSR2	1.1062e-08	1.08555	0.000308896
KRT4	1.10346e-11	1.17217	3.08132e-07
CTSK	1.10325e-96	2.92668	3.08071e-92
AZGP1	1.09959e-45	-1.26336	3.07051e-41
CDA	1.09862e-17	1.11594	3.06779e-13
HS3ST3A1	1.09573e-41	2.59703	3.05972e-37
ZCCHC24	1.09533e-39	1.14551	3.05859e-35
TRPC4	1.09517e-20	3.22068	3.05816e-16
OSM	1.09479e-119	2.45557	3.05708e-115
ELANE	1.09406e-144	6.06911	3.05506e-140
CRCT1	1.09178e-13	2.05045	3.0487e-09
CD5	1.09158e-27	1.92527	3.04813e-23
IGDCC4	1.08937e-53	3.16306	3.04196e-49
LINC01426	1.0868e-06	1.96265	0.0303478
RP4-621F18.2	1.08081e-19	1.40852	3.01806e-15
FCGR3A	1.08051e-60	-1.31017	3.01722e-56
CD24	1.0802e-115	1.6813	3.01635e-111
CAMK4	1.07902e-39	1.80724	3.01306e-35
ZC3HAV1L	1.07754e-16	1.55391	3.00891e-12
GPC2	1.07753e-11	1.29695	3.00891e-07
AFF2	1.06083e-20	2.58532	2.96226e-16
C1QTNF4	1.0554e-17	1.66463	2.94709e-13
CXCL10	1.05372e-08	1.22112	0.000294242
LRRC4B	1.04695e-14	1.62744	2.92351e-10
PALLD	1.04643e-31	1.40438	2.92204e-27
MEIS3	1.04589e-106	2.70225	2.92054e-102
ZNF469	1.04586e-13	1.22127	2.92046e-09
CYP2A7	1.04564e-16	-3.33789	2.91984e-12
KMT2E-AS1	1.04508e-24	1.44709	2.91827e-20
ADRA2A	1.04408e-19	2.06523	2.91548e-15
PCDH19	1.04225e-09	1.69943	2.91038e-05
NLGN4Y	1.04121e-12	1.09346	2.90747e-08
PKHD1L1	1.04099e-07	-1.36383	0.00290687
MYBPHL	1.04094e-18	2.27529	2.90672e-14
RFX8	1.04018e-30	2.50611	2.9046e-26
NR2F1-AS1	1.03967e-70	1.88812	2.90317e-66
NKG7	1.03861e-78	-1.95828	2.90022e-74
CH17-360D5.2	1.03848e-12	-1.35274	2.89985e-08
CXCR4	1.03513e-255	2.34369	2.89051e-251
ITGA11	1.03295e-94	3.61456	2.88441e-90
SGMS2	1.02831e-132	-1.13888	2.87146e-128
ANK2	1.02783e-46	1.94243	2.87011e-42
ENPP3	1.02672e-09	2.50284	2.86701e-05
FDXR	1.0253e-12	1.03991	2.86306e-08
TRBC1	1.02333e-43	1.17998	2.85753e-39
LOXL2	1.02235e-108	2.13239	2.8548e-104
GKN2	1.01732e-87	-1.31894	2.84076e-83
SYNDIG1	1.01533e-58	4.33265	2.8352e-54
RBP5	1.01495e-117	3.15577	2.83414e-113
SERPINI1	1.01336e-06	1.26734	0.028297
PLVAP	1.01104e-120	3.82699	2.82323e-116
CXCR5	1.00718e-15	3.87068	2.81245e-11
TDO2	1.00573e-121	4.1949	2.8084e-117
ISLR	1.00513e-165	3.76244	2.80672e-161
PRUNE2	1.00505e-10	-1.47244	2.80651e-06
FCN1	1.00505e-53	1.25227	2.8065e-49
NAP1L3	1.00229e-20	1.85863	2.79879e-16
CEMIP	1.00163e-07	1.30705	0.00279695
SPP1	0	4.71623	0
IGLC3	0	2.43156	0
IGHG4	0	3.56338	0
CXCL14	0	4.68129	0
IGHA2	0	3.2427	0
THY1	0	4.01242	0

## Sheet: Supplementary Table 6
Supplementary Table 6: Significant MR results between the expression of druggable genes and NSCLC.
id	nsnp	method	b	se	or	or_lci95	or_uci95	pvalue	cell types
C4B	23	Inverse variance weighted	0.0839775	0.0132677	1.0876	1.05969	1.11626	2.46e-10	DC
TCN2	43	Inverse variance weighted	0.137058	0.0249809	1.14689	1.09209	1.20445	4.1e-08	DC
RPS6KA2	41	Inverse variance weighted	0.143051	0.0300967	1.15379	1.0877	1.2239	2e-06	DC
TYMP	55	Inverse variance weighted	-0.0703275	0.0162183	0.932089	0.902925	0.962194	1.45e-05	DC
C5	65	Inverse variance weighted	0.0743595	0.017568	1.07719	1.04073	1.11493	2.31e-05	DC
CSK	25	Inverse variance weighted	0.142827	0.0340383	1.15353	1.07908	1.23311	2.72e-05	DC
PIK3C3	10	Inverse variance weighted	-0.179575	0.0435295	0.835625	0.767288	0.910048	3.7e-05	DC
CASP8	19	Inverse variance weighted	-0.212826	0.0525166	0.808296	0.729235	0.895929	5.07e-05	DC
GPX1	1	Wald ratio	0.65903	0.164711	1.93292	1.39961	2.66943	6.3e-05	DC
IL1RAP	9	Inverse variance weighted	-0.21341	0.0543858	0.807825	0.726144	0.898693	8.71e-05	DC
ALDH5A1	36	Inverse variance weighted	-0.107288	0.027796	0.898267	0.850639	0.948563	0.000113469	DC
MERTK	55	Inverse variance weighted	0.0660125	0.0172466	1.06824	1.03273	1.10497	0.000129422	DC
MPZL3	16	Inverse variance weighted	-0.181641	0.0476808	0.8339	0.7595	0.91559	0.000139232	DC
APOM	1	Wald ratio	-0.573696	0.153582	0.563439	0.41698	0.761339	0.000187381	DC
CPA3	9	Inverse variance weighted	-0.313675	0.0841714	0.730756	0.619618	0.861828	0.000194058	DC
MPI	22	Inverse variance weighted	-0.198009	0.0534998	0.820363	0.738696	0.911058	0.000214658	DC
TPSAB1	32	Inverse variance weighted	-0.0910238	0.024941	0.912996	0.869438	0.958736	0.000262688	DC
CTSW	55	Inverse variance weighted	-0.0690802	0.019044	0.933252	0.899059	0.968745	0.000286292	DC
ADAMTS10	8	Inverse variance weighted	-0.233056	0.0643775	0.79211	0.69821	0.898637	0.000294441	DC
SLCO4A1	2	Inverse variance weighted	0.721679	0.200587	2.05789	1.38892	3.04905	0.000320866	DC
GYPC	16	Inverse variance weighted	0.150936	0.0420265	1.16292	1.07097	1.26277	0.000328831	DC
CYP2D6	24	Inverse variance weighted	0.119422	0.0334717	1.12685	1.05529	1.20325	0.000359914	DC
PRKCB	53	Inverse variance weighted	0.0942012	0.0264989	1.09878	1.04317	1.15736	0.000378107	DC
FKBP9	17	Inverse variance weighted	0.128466	0.0363186	1.13708	1.05895	1.22098	0.000404387	DC
TNFSF12	52	Inverse variance weighted	-0.0765063	0.0217744	0.926347	0.887644	0.966737	0.000442094	DC
CLU	1	Wald ratio	-1.03168	0.29842	0.356407	0.198576	0.639686	0.000545935	DC
GPR153	2	Inverse variance weighted	0.521951	0.151433	1.68531	1.2525	2.26768	0.000567367	DC
IRAK2	10	Inverse variance weighted	-0.281107	0.0823306	0.754947	0.642444	0.887152	0.000639295	DC
MAP3K6	32	Inverse variance weighted	-0.0913336	0.0268005	0.912713	0.866007	0.961939	0.000654634	DC
PRKCZ	13	Inverse variance weighted	0.197437	0.0580163	1.21828	1.08733	1.36499	0.000666166	DC
WEE1	13	Inverse variance weighted	-0.22567	0.066599	0.797982	0.70033	0.90925	0.000702805	DC
LEPR	42	Inverse variance weighted	0.0784786	0.0231864	1.08164	1.03358	1.13193	0.000712594	DC
EPHA1	20	Inverse variance weighted	-0.118049	0.0352727	0.888652	0.829291	0.952262	0.000817613	DC
ITGAX	44	Inverse variance weighted	-0.0582392	0.0174093	0.943424	0.911776	0.976172	0.000821952	DC
TNFSF10	16	Inverse variance weighted	-0.180571	0.0540983	0.834793	0.750809	0.928172	0.000844351	DC
PIM3	30	Inverse variance weighted	-0.116244	0.0352146	0.890258	0.830885	0.953875	0.00096339	DC
ACPP	36	Inverse variance weighted	-0.0788457	0.0240108	0.924182	0.881697	0.968715	0.00102434	DC
TNFRSF4	9	Inverse variance weighted	0.171355	0.0522062	1.18691	1.07147	1.31479	0.00102972	DC
SLC12A7	31	Inverse variance weighted	0.0688542	0.0210743	1.07128	1.02793	1.11646	0.0010861	DC
PRKD1	19	Inverse variance weighted	-0.136215	0.0417894	0.872655	0.804027	0.94714	0.00111584	DC
EPHX2	43	Inverse variance weighted	-0.109929	0.0338873	0.895897	0.838326	0.957423	0.00117877	DC
ENGASE	20	Inverse variance weighted	-0.0929339	0.0288517	0.911254	0.861153	0.964269	0.00127704	DC
DRAXIN	11	Inverse variance weighted	0.119659	0.0373061	1.12711	1.04764	1.21261	0.00133896	DC
DUSP3	14	Inverse variance weighted	-0.168574	0.0526014	0.844869	0.762104	0.936623	0.00135186	DC
MUC4	23	Inverse variance weighted	0.14219	0.0445117	1.1528	1.05649	1.25789	0.00140098	DC
RGS12	24	Inverse variance weighted	0.116689	0.0369301	1.12377	1.0453	1.20813	0.00157919	DC
LY96	28	Inverse variance weighted	-0.105738	0.0336675	0.899661	0.84221	0.96103	0.00168576	DC
EPHX1	6	Inverse variance weighted	-0.329021	0.104823	0.719628	0.585977	0.883762	0.00169629	DC
NR2F6	52	Inverse variance weighted	-0.0611773	0.0198193	0.940656	0.904817	0.977916	0.00202357	DC
KLHL5	51	Inverse variance weighted	-0.0701315	0.0227618	0.932271	0.891594	0.974805	0.00206236	DC
TRPC3	15	Inverse variance weighted	0.184737	0.0600912	1.2029	1.06925	1.35326	0.0021101	DC
VDR	21	Inverse variance weighted	-0.14558	0.0474691	0.864521	0.787715	0.948816	0.00216339	DC
NR1D1	8	Inverse variance weighted	0.186733	0.0609646	1.2053	1.06955	1.35829	0.00219154	DC
ABCA1	20	Inverse variance weighted	0.173107	0.0567796	1.18899	1.06377	1.32896	0.00229794	DC
PPME1	2	Inverse variance weighted	-0.895182	0.294132	0.408533	0.229539	0.727106	0.0023387	DC
COL9A3	32	Inverse variance weighted	-0.0501824	0.0167122	0.951056	0.920408	0.982725	0.00267565	DC
C4BPA	36	Inverse variance weighted	0.035832	0.0120074	1.03648	1.01237	1.06116	0.00284351	DC
NENF	18	Inverse variance weighted	0.160443	0.0539967	1.17403	1.05613	1.3051	0.00296504	DC
CCR4	13	Inverse variance weighted	0.181598	0.0614101	1.19913	1.06315	1.35251	0.00310507	DC
LNPEP	22	Inverse variance weighted	-0.116052	0.0393189	0.890429	0.824385	0.961763	0.00316173	DC
TEC	5	Inverse variance weighted	0.400226	0.136833	1.49216	1.14115	1.95115	0.00344533	DC
F11R	11	Inverse variance weighted	0.211437	0.0725435	1.23545	1.07171	1.42422	0.00356115	DC
CD163L1	13	Inverse variance weighted	0.206273	0.0715921	1.22909	1.06818	1.41424	0.00396123	DC
CDA	52	Inverse variance weighted	-0.0532044	0.0185238	0.948186	0.914378	0.983244	0.00407599	DC
GPR84	15	Inverse variance weighted	0.155672	0.0545218	1.16844	1.05002	1.30022	0.00430067	DC
ADORA1	24	Inverse variance weighted	0.084011	0.0295984	1.08764	1.02634	1.1526	0.00453462	DC
GRN	15	Inverse variance weighted	0.132504	0.0467624	1.14168	1.0417	1.25127	0.00460335	DC
BTN3A2	63	Inverse variance weighted	-0.0425453	0.015024	0.958347	0.930538	0.986987	0.00462827	DC
CD36	57	Inverse variance weighted	-0.050244	0.0177446	0.950997	0.918491	0.984654	0.00463294	DC
PTPN13	2	Inverse variance weighted	0.491367	0.173742	1.63455	1.1628	2.29768	0.00468182	DC
TNFRSF9	14	Inverse variance weighted	-0.29284	0.103698	0.746141	0.608908	0.914304	0.00474316	DC
IFNL1	12	Inverse variance weighted	-0.166323	0.05925	0.846773	0.753932	0.951046	0.00499838	DC
TGFBI	45	Inverse variance weighted	0.0707377	0.0252017	1.0733	1.02157	1.12765	0.00500273	DC
PRKD2	33	Inverse variance weighted	0.0783208	0.0279056	1.08147	1.02391	1.14227	0.00500629	DC
COL4A2	1	Wald ratio	-0.708844	0.252805	0.492213	0.299889	0.807877	0.00504865	DC
WNT3	4	Inverse variance weighted	-0.401164	0.143083	0.66954	0.505804	0.88628	0.00505164	DC
ICAM3	20	Inverse variance weighted	-0.105818	0.037977	0.899589	0.835059	0.969104	0.00533025	DC
HLA-DQA2	38	Inverse variance weighted	0.0393948	0.0141727	1.04018	1.01168	1.06948	0.00544215	DC
MAPK6	2	Inverse variance weighted	0.532727	0.193734	1.70357	1.16533	2.4904	0.00596347	DC
CD33	18	Inverse variance weighted	0.102553	0.0375283	1.108	1.02942	1.19257	0.00628209	DC
CX3CR1	25	Inverse variance weighted	0.127245	0.0465975	1.1357	1.03657	1.2443	0.00631944	DC
HKDC1	44	Inverse variance weighted	-0.0616698	0.0228351	0.940193	0.899041	0.983229	0.00692032	DC
LAIR2	21	Inverse variance weighted	0.0928621	0.0344713	1.09731	1.02562	1.17401	0.00706218	DC
CREG1	21	Inverse variance weighted	0.0887735	0.0330183	1.09283	1.02435	1.1659	0.00717495	DC
BLM	43	Inverse variance weighted	-0.0651599	0.0242926	0.936918	0.893353	0.982607	0.00731183	DC
EFNA1	3	Inverse variance weighted	0.575028	0.215585	1.77718	1.16472	2.71169	0.00764641	DC
AMPD3	17	Inverse variance weighted	-0.135381	0.0508926	0.873383	0.790468	0.964996	0.00781125	DC
B4GALT1	15	Inverse variance weighted	-0.13034	0.0490675	0.877797	0.797309	0.966409	0.00789934	DC
MVD	16	Inverse variance weighted	0.150175	0.05655	1.16204	1.04012	1.29824	0.00791653	DC
KCNH2	10	Inverse variance weighted	-0.184799	0.0699367	0.831271	0.724789	0.953397	0.00823249	DC
VEGFA	12	Inverse variance weighted	0.129266	0.0492793	1.13799	1.03322	1.25339	0.00871281	DC
CCRL2	6	Inverse variance weighted	-0.195506	0.0749126	0.822418	0.71011	0.952488	0.0090597	DC
AATK	36	Inverse variance weighted	-0.054156	0.020775	0.947284	0.909487	0.986653	0.00913956	DC
PDE9A	55	Inverse variance weighted	0.050057	0.0192101	1.05133	1.01248	1.09167	0.00916672	DC
CD40	42	Inverse variance weighted	-0.0672997	0.0259097	0.934915	0.888623	0.983619	0.00939129	DC
C4BPB	20	Inverse variance weighted	-0.119945	0.0461988	0.88697	0.810184	0.971033	0.00942423	DC
ATM	2	Inverse variance weighted	-0.300127	0.116285	0.740724	0.589756	0.930338	0.00985281	DC
SCGB3A1	62	Inverse variance weighted	0.0447713	0.017402	1.04579	1.01072	1.08207	0.0100889	DC
SULT1A2	31	Inverse variance weighted	0.0662932	0.0257812	1.06854	1.01589	1.12392	0.0101296	DC
CD151	73	Inverse variance weighted	-0.0422597	0.0164652	0.958621	0.928178	0.990062	0.0102699	DC
CD52	17	Inverse variance weighted	0.115923	0.0451973	1.12291	1.02771	1.22692	0.0103226	DC
PIK3R1	8	Inverse variance weighted	-0.262649	0.10303	0.769012	0.628394	0.941096	0.0107956	DC
STK4	4	Inverse variance weighted	0.242307	0.0961422	1.27419	1.05535	1.5384	0.0117255	DC
GSN	67	Inverse variance weighted	0.0423159	0.0168866	1.04322	1.00926	1.07833	0.0122144	DC
PTPN22	17	Inverse variance weighted	-0.146984	0.0587022	0.863308	0.76948	0.968577	0.0122837	DC
VKORC1	4	Inverse variance weighted	-0.26975	0.107796	0.76357	0.618147	0.943206	0.0123348	DC
BAMBI	15	Inverse variance weighted	-0.162768	0.0652031	0.849789	0.747841	0.965635	0.012549	DC
CNGA1	12	Inverse variance weighted	0.143769	0.0579953	1.15462	1.03056	1.29361	0.013176	DC
MAPK11	1	Wald ratio	0.586693	0.238718	1.79803	1.12615	2.87077	0.0139838	DC
GRK5	16	Inverse variance weighted	0.152871	0.0628059	1.16517	1.03022	1.31781	0.0149321	DC
KCNJ15	38	Inverse variance weighted	-0.0603903	0.0248303	0.941397	0.896679	0.988346	0.0150107	DC
KMO	15	Inverse variance weighted	0.111611	0.0460921	1.11808	1.0215	1.22379	0.0154578	DC
FCRL6	16	Inverse variance weighted	0.0782924	0.0327331	1.08144	1.01424	1.15309	0.0167641	DC
IFNG	5	Inverse variance weighted	-0.302874	0.126998	0.738692	0.575918	0.947473	0.0170856	DC
CXCL10	12	Inverse variance weighted	0.155832	0.0655564	1.16863	1.02772	1.32886	0.017451	DC
KCNN4	59	Inverse variance weighted	-0.049476	0.0208416	0.951728	0.913634	0.991411	0.017601	DC
PTK2	15	Inverse variance weighted	0.13435	0.0566232	1.14379	1.02364	1.27804	0.0176585	DC
QSOX1	41	Inverse variance weighted	0.0538827	0.0227678	1.05536	1.0093	1.10352	0.0179515	DC
S1PR1	4	Inverse variance weighted	-0.299046	0.126518	0.741525	0.57867	0.950212	0.0180954	DC
ADAM8	9	Inverse variance weighted	-0.17113	0.0725305	0.842712	0.731038	0.971446	0.0183036	DC
H1F0	68	Inverse variance weighted	-0.0345513	0.014708	0.966039	0.938588	0.994293	0.0188164	DC
PKN1	8	Inverse variance weighted	-0.169921	0.0724146	0.843732	0.732089	0.9724	0.0189508	DC
KCNQ1	1	Wald ratio	-0.546751	0.234886	0.578827	0.365266	0.917251	0.0199266	DC
CD2	1	Wald ratio	-0.446771	0.192248	0.63969	0.438859	0.932426	0.0201292	DC
CCL4L2	12	Inverse variance weighted	0.0579079	0.0249576	1.05962	1.00903	1.11274	0.0203275	DC
SERPING1	26	Inverse variance weighted	0.0959433	0.0414109	1.1007	1.01489	1.19376	0.0205113	DC
ADRB1	13	Inverse variance weighted	-0.117244	0.0506942	0.889368	0.805248	0.982275	0.020735	DC
TNFRSF11A	3	Inverse variance weighted	-0.366063	0.15962	0.693459	0.507165	0.948183	0.0218285	DC
ANXA2	22	Inverse variance weighted	0.109708	0.0478741	1.11595	1.016	1.22574	0.0219289	DC
GPX3	15	Inverse variance weighted	-0.115655	0.0506563	0.890782	0.806588	0.983764	0.0224223	DC
DDO	31	Inverse variance weighted	0.0774878	0.0340267	1.08057	1.01085	1.15509	0.0227702	DC
KIR2DL3	3	Inverse variance weighted	0.216959	0.0954521	1.24229	1.03032	1.49787	0.0230283	DC
PARM1	5	Inverse variance weighted	-0.152238	0.0670283	0.858783	0.753057	0.979353	0.0231315	DC
KLRB1	16	Inverse variance weighted	0.113358	0.0499793	1.12003	1.01552	1.2353	0.0233233	DC
CD1E	24	Inverse variance weighted	-0.0975039	0.0429922	0.907099	0.833794	0.986848	0.0233327	DC
IL32	36	Inverse variance weighted	0.0565003	0.024916	1.05813	1.00769	1.11108	0.0233519	DC
CD55	76	Inverse variance weighted	0.0396824	0.0175221	1.04048	1.00535	1.07683	0.0235307	DC
IL17RB	9	Inverse variance weighted	0.148756	0.0659068	1.16039	1.01977	1.3204	0.024004	DC
CMKLR1	41	Inverse variance weighted	0.0502772	0.0223817	1.05156	1.00643	1.09872	0.0246816	DC
DAG1	2	Inverse variance weighted	-0.422021	0.189278	0.65572	0.452483	0.950244	0.0257713	DC
TNFSF14	17	Inverse variance weighted	-0.0979765	0.0439763	0.90667	0.831794	0.988286	0.0258847	DC
COL6A1	27	Inverse variance weighted	-0.0921232	0.0413907	0.911993	0.840928	0.989063	0.0260343	DC
IL18	13	Inverse variance weighted	0.117684	0.0530856	1.12489	1.01373	1.24824	0.0266317	DC
IFNGR2	49	Inverse variance weighted	0.0474015	0.0214474	1.04854	1.00538	1.09356	0.0270966	DC
GPLD1	2	Inverse variance weighted	-0.405544	0.183978	0.666614	0.464803	0.956048	0.0275028	DC
CD53	17	Inverse variance weighted	-0.140827	0.0639284	0.868639	0.766342	0.984592	0.0276023	DC
KCNG2	5	Inverse variance weighted	0.250234	0.113855	1.28433	1.02745	1.60543	0.0279606	DC
IFIT1	8	Inverse variance weighted	0.240945	0.10965	1.27245	1.02637	1.57753	0.0279922	DC
SUMF1	52	Inverse variance weighted	0.0487707	0.0222579	1.04998	1.00516	1.0968	0.0284397	DC
IL6R	6	Inverse variance weighted	-0.237941	0.108615	0.788249	0.637101	0.975257	0.0284756	DC
RNPEP	68	Inverse variance weighted	0.0283546	0.012972	1.02876	1.00293	1.05525	0.0288286	DC
CACNA2D3	16	Inverse variance weighted	-0.126618	0.0579658	0.88107	0.786446	0.987079	0.0289364	DC
MS4A1	1	Wald ratio	0.857817	0.392822	2.35801	1.09186	5.0924	0.0289822	DC
C3	3	Inverse variance weighted	0.304288	0.139464	1.35566	1.03142	1.78182	0.0291213	DC
SLAMF7	6	Inverse variance weighted	0.17619	0.0810884	1.19266	1.01741	1.39811	0.0297948	DC
CBR1	18	Inverse variance weighted	0.103086	0.0475013	1.10859	1.01003	1.21676	0.0299935	DC
FCN1	43	Inverse variance weighted	0.0445752	0.0205418	1.04558	1.00432	1.08854	0.0300083	DC
AGER	15	Inverse variance weighted	0.19561	0.0902568	1.21605	1.01888	1.45138	0.0302147	DC
LAMB2	7	Inverse variance weighted	0.239251	0.110487	1.2703	1.02296	1.57744	0.0303554	DC
STK38L	6	Inverse variance weighted	-0.246872	0.114101	0.781241	0.624684	0.977034	0.0304931	DC
GPX4	48	Inverse variance weighted	-0.0387537	0.0179312	0.961988	0.928766	0.996398	0.0306769	DC
PCSK7	35	Inverse variance weighted	0.0647313	0.0301108	1.06687	1.00573	1.13173	0.0315735	DC
COL13A1	8	Inverse variance weighted	0.246822	0.114925	1.27995	1.0218	1.60332	0.0317391	DC
CLCN2	2	Inverse variance weighted	-0.26002	0.121178	0.771036	0.608031	0.97774	0.031891	DC
SLCO5A1	1	Wald ratio	0.758232	0.353548	2.1345	1.06745	4.26818	0.0319821	DC
F2RL1	54	Inverse variance weighted	0.0321808	0.0150203	1.0327	1.00274	1.06356	0.0321543	DC
ITGA4	47	Inverse variance weighted	0.0465474	0.0218955	1.04765	1.00364	1.09359	0.0335125	DC
P2RY13	24	Inverse variance weighted	0.0930475	0.0438118	1.09751	1.0072	1.19592	0.0336868	DC
PTPRS	3	Inverse variance weighted	0.431284	0.203989	1.53923	1.03197	2.29585	0.0344938	DC
CDC42	41	Inverse variance weighted	0.0578787	0.0274334	1.05959	1.00412	1.11812	0.0348765	DC
HFE	1	Wald ratio	-0.823694	0.393395	0.438808	0.20296	0.948722	0.036277	DC
CALM1	9	Inverse variance weighted	0.120298	0.0575126	1.12783	1.0076	1.26241	0.0364673	DC
TOP1MT	12	Inverse variance weighted	-0.179445	0.0859733	0.835734	0.706132	0.989123	0.0368688	DC
SLC28A3	6	Inverse variance weighted	0.0869954	0.0416985	1.09089	1.00528	1.18379	0.036952	DC
GALNS	28	Inverse variance weighted	-0.101168	0.0485513	0.903781	0.821742	0.99401	0.0371836	DC
EDN1	9	Inverse variance weighted	0.157954	0.0758242	1.17111	1.00938	1.35876	0.0372364	DC
SLC40A1	40	Inverse variance weighted	-0.0579753	0.027931	0.943673	0.893401	0.996775	0.0379251	DC
MYLK4	20	Inverse variance weighted	-0.0567229	0.0274368	0.944856	0.895387	0.997058	0.0386964	DC
CD244	22	Inverse variance weighted	0.0880224	0.0426815	1.09201	1.00438	1.1873	0.0391786	DC
OBSCN	13	Inverse variance weighted	0.136822	0.066625	1.14662	1.00626	1.30657	0.0400127	DC
FBP1	19	Inverse variance weighted	0.10319	0.0504142	1.1087	1.00439	1.22385	0.040674	DC
ITPR1	16	Inverse variance weighted	-0.0955324	0.0468113	0.908889	0.829209	0.996225	0.0412707	DC
CXCR4	1	Wald ratio	-0.729379	0.358321	0.482208	0.238905	0.973293	0.0417958	DC
ITGAL	14	Inverse variance weighted	0.156626	0.0769971	1.16956	1.00573	1.36007	0.041934	DC
CDK8	1	Wald ratio	0.398332	0.196489	1.48934	1.0133	2.18901	0.0426374	DC
PLOD1	41	Inverse variance weighted	0.0362927	0.0179525	1.03696	1.00111	1.0741	0.0432179	DC
CASP6	4	Inverse variance weighted	-0.244348	0.121005	0.783215	0.617845	0.992848	0.0434543	DC
SPHK1	22	Inverse variance weighted	-0.082598	0.0409203	0.920721	0.84976	0.997609	0.043538	DC
PROS1	4	Inverse variance weighted	0.169186	0.0844383	1.18434	1.00369	1.3975	0.0451066	DC
SORD	4	Inverse variance weighted	0.156716	0.0783555	1.16966	1.00314	1.36382	0.0454938	DC
ITK	19	Inverse variance weighted	0.099141	0.0496506	1.10422	1.00183	1.21708	0.0458497	DC
HLA-DRB5	54	Inverse variance weighted	-0.0297668	0.0149086	0.970672	0.942718	0.999454	0.0458663	DC
MAPKAPK5	7	Inverse variance weighted	0.136638	0.0684524	1.14641	1.00247	1.31102	0.0459237	DC
ELANE	5	Inverse variance weighted	0.180938	0.0909258	1.19834	1.00273	1.43212	0.0465962	DC
CD70	4	Inverse variance weighted	-0.223951	0.112667	0.799354	0.640966	0.996882	0.0468427	DC
ACTN1	7	Inverse variance weighted	0.191359	0.0964059	1.21089	1.00241	1.46274	0.0471521	DC
SCNN1D	6	Inverse variance weighted	0.265753	0.133921	1.30441	1.00327	1.69594	0.0472112	DC
TMEM123	7	Inverse variance weighted	-0.151776	0.0765106	0.85918	0.739532	0.998186	0.047286	DC
CHIT1	7	Inverse variance weighted	0.171228	0.0864743	1.18676	1.00174	1.40596	0.0476926	DC
ORM1	38	Inverse variance weighted	0.0387196	0.0196269	1.03948	1.00025	1.08025	0.0485196	DC
OAS1	67	Inverse variance weighted	-0.0767521	0.0164584	0.926119	0.896721	0.956482	3.11e-06	Eosinophils
CXCL5	37	Inverse variance weighted	0.0913336	0.0263505	1.09563	1.04048	1.15371	0.000528064	Eosinophils
TNFRSF4	9	Inverse variance weighted	0.171355	0.0522062	1.18691	1.07147	1.31479	0.00102972	Eosinophils
CCR4	13	Inverse variance weighted	0.181598	0.0614101	1.19913	1.06315	1.35251	0.00310507	Eosinophils
TNFRSF9	14	Inverse variance weighted	-0.29284	0.103698	0.746141	0.608908	0.914304	0.00474316	Eosinophils
HLA-DQA2	38	Inverse variance weighted	0.0393948	0.0141727	1.04018	1.01168	1.06948	0.00544215	Eosinophils
IFNG	5	Inverse variance weighted	-0.302874	0.126998	0.738692	0.575918	0.947473	0.0170856	Eosinophils
CD2	1	Wald ratio	-0.446771	0.192248	0.63969	0.438859	0.932426	0.0201292	Eosinophils
SERPINB10	37	Inverse variance weighted	0.0507452	0.0222862	1.05205	1.00709	1.09903	0.0227877	Eosinophils
IL32	36	Inverse variance weighted	0.0565003	0.024916	1.05813	1.00769	1.11108	0.0233519	Eosinophils
AURKB	6	Inverse variance weighted	0.130941	0.0583545	1.1399	1.0167	1.27803	0.0248392	Eosinophils
IFIT1	8	Inverse variance weighted	0.240945	0.10965	1.27245	1.02637	1.57753	0.0279922	Eosinophils
MS4A1	1	Wald ratio	0.857817	0.392822	2.35801	1.09186	5.0924	0.0289822	Eosinophils
IGLC3	6	Inverse variance weighted	0.0758811	0.0355173	1.07883	1.00629	1.15661	0.0326425	Eosinophils
LTB	2	Inverse variance weighted	-0.340174	0.163341	0.711646	0.516684	0.980174	0.0372881	Eosinophils
CXCR4	1	Wald ratio	-0.729379	0.358321	0.482208	0.238905	0.973293	0.0417958	Eosinophils
HLA-DRB5	54	Inverse variance weighted	-0.0297668	0.0149086	0.970672	0.942718	0.999454	0.0458663	Eosinophils
ELANE	5	Inverse variance weighted	0.180938	0.0909258	1.19834	1.00273	1.43212	0.0465962	Eosinophils
CD70	4	Inverse variance weighted	-0.223951	0.112667	0.799354	0.640966	0.996882	0.0468427	Eosinophils
CHIT1	7	Inverse variance weighted	0.171228	0.0864743	1.18676	1.00174	1.40596	0.0476926	Eosinophils
HLA-B	28	Inverse variance weighted	-0.0511802	0.0154188	0.950107	0.921824	0.979259	0.000902302	Macrophage
FPR1	49	Inverse variance weighted	0.0556672	0.020149	1.05725	1.01631	1.09983	0.00573126	Macrophage
SCGB3A1	62	Inverse variance weighted	0.0447713	0.017402	1.04579	1.01072	1.08207	0.0100889	Macrophage
AKR1C2	47	Inverse variance weighted	-0.0675212	0.0281019	0.934708	0.884617	0.987636	0.0162734	Macrophage
FCRL6	16	Inverse variance weighted	0.0782924	0.0327331	1.08144	1.01424	1.15309	0.0167641	Macrophage
IL6R	6	Inverse variance weighted	-0.237941	0.108615	0.788249	0.637101	0.975257	0.0284756	Macrophage
JUN	16	Inverse variance weighted	0.104448	0.0503982	1.1101	1.00568	1.22535	0.0382238	Macrophage
CD244	22	Inverse variance weighted	0.0880224	0.0426815	1.09201	1.00438	1.1873	0.0391786	Macrophage
TCN2	43	Inverse variance weighted	0.137058	0.0249809	1.14689	1.09209	1.20445	4.1e-08	Monocytes
ACP5	58	Inverse variance weighted	0.0693961	0.0171352	1.07186	1.03646	1.10847	5.12e-05	Monocytes
MERTK	55	Inverse variance weighted	0.0660125	0.0172466	1.06824	1.03273	1.10497	0.000129422	Monocytes
CPA3	9	Inverse variance weighted	-0.313675	0.0841714	0.730756	0.619618	0.861828	0.000194058	Monocytes
TPSAB1	32	Inverse variance weighted	-0.0910238	0.024941	0.912996	0.869438	0.958736	0.000262688	Monocytes
CTSW	55	Inverse variance weighted	-0.0690802	0.019044	0.933252	0.899059	0.968745	0.000286292	Monocytes
SLCO4A1	2	Inverse variance weighted	0.721679	0.200587	2.05789	1.38892	3.04905	0.000320866	Monocytes
CYP2D6	24	Inverse variance weighted	0.119422	0.0334717	1.12685	1.05529	1.20325	0.000359914	Monocytes
CXCL5	37	Inverse variance weighted	0.0913336	0.0263505	1.09563	1.04048	1.15371	0.000528064	Monocytes
CLU	1	Wald ratio	-1.03168	0.29842	0.356407	0.198576	0.639686	0.000545935	Monocytes
GPR153	2	Inverse variance weighted	0.521951	0.151433	1.68531	1.2525	2.26768	0.000567367	Monocytes
CLEC11A	10	Inverse variance weighted	0.124183	0.0367541	1.13222	1.05353	1.2168	0.000728147	Monocytes
TNFRSF4	9	Inverse variance weighted	0.171355	0.0522062	1.18691	1.07147	1.31479	0.00102972	Monocytes
PRKD1	19	Inverse variance weighted	-0.136215	0.0417894	0.872655	0.804027	0.94714	0.00111584	Monocytes
EPHX2	43	Inverse variance weighted	-0.109929	0.0338873	0.895897	0.838326	0.957423	0.00117877	Monocytes
DRAXIN	11	Inverse variance weighted	0.119659	0.0373061	1.12711	1.04764	1.21261	0.00133896	Monocytes
MUC4	23	Inverse variance weighted	0.14219	0.0445117	1.1528	1.05649	1.25789	0.00140098	Monocytes
HIST1H4E	10	Inverse variance weighted	0.247883	0.0784693	1.28131	1.09865	1.49434	0.00158326	Monocytes
ADAM12	9	Inverse variance weighted	0.256762	0.0833124	1.29274	1.09798	1.52204	0.00205672	Monocytes
KLHL5	51	Inverse variance weighted	-0.0701315	0.0227618	0.932271	0.891594	0.974805	0.00206236	Monocytes
CCR6	17	Inverse variance weighted	-0.162956	0.0530248	0.849629	0.765761	0.942681	0.00211774	Monocytes
ABCA1	20	Inverse variance weighted	0.173107	0.0567796	1.18899	1.06377	1.32896	0.00229794	Monocytes
CCR4	13	Inverse variance weighted	0.181598	0.0614101	1.19913	1.06315	1.35251	0.00310507	Monocytes
LATS2	9	Inverse variance weighted	0.177106	0.0601301	1.19376	1.06104	1.34307	0.00322561	Monocytes
CDA	52	Inverse variance weighted	-0.0532044	0.0185238	0.948186	0.914378	0.983244	0.00407599	Monocytes
GPR84	15	Inverse variance weighted	0.155672	0.0545218	1.16844	1.05002	1.30022	0.00430067	Monocytes
PTPN13	2	Inverse variance weighted	0.491367	0.173742	1.63455	1.1628	2.29768	0.00468182	Monocytes
TNFRSF9	14	Inverse variance weighted	-0.29284	0.103698	0.746141	0.608908	0.914304	0.00474316	Monocytes
IFNL1	12	Inverse variance weighted	-0.166323	0.05925	0.846773	0.753932	0.951046	0.00499838	Monocytes
WNT3	4	Inverse variance weighted	-0.401164	0.143083	0.66954	0.505804	0.88628	0.00505164	Monocytes
FPR1	49	Inverse variance weighted	0.0556672	0.020149	1.05725	1.01631	1.09983	0.00573126	Monocytes
CX3CR1	25	Inverse variance weighted	0.127245	0.0465975	1.1357	1.03657	1.2443	0.00631944	Monocytes
HIST1H1C	11	Inverse variance weighted	-0.200166	0.073756	0.818595	0.708413	0.945914	0.00664988	Monocytes
LAIR2	21	Inverse variance weighted	0.0928621	0.0344713	1.09731	1.02562	1.17401	0.00706218	Monocytes
LPAR3	12	Inverse variance weighted	0.116106	0.04314	1.12311	1.03205	1.22221	0.00711605	Monocytes
FCGBP	61	Inverse variance weighted	-0.0489936	0.0182292	0.952187	0.918767	0.986823	0.00719595	Monocytes
BLM	43	Inverse variance weighted	-0.0651599	0.0242926	0.936918	0.893353	0.982607	0.00731183	Monocytes
AMPD3	17	Inverse variance weighted	-0.135381	0.0508926	0.873383	0.790468	0.964996	0.00781125	Monocytes
KCNH2	10	Inverse variance weighted	-0.184799	0.0699367	0.831271	0.724789	0.953397	0.00823249	Monocytes
VEGFA	12	Inverse variance weighted	0.129266	0.0492793	1.13799	1.03322	1.25339	0.00871281	Monocytes
SECTM1	7	Inverse variance weighted	-0.189292	0.0728402	0.827545	0.717445	0.954541	0.00935705	Monocytes
C4BPB	20	Inverse variance weighted	-0.119945	0.0461988	0.88697	0.810184	0.971033	0.00942423	Monocytes
ALOX15	30	Inverse variance weighted	-0.0754157	0.0290991	0.927358	0.875947	0.981786	0.00955066	Monocytes
PTGIR	22	Inverse variance weighted	0.106543	0.0415737	1.11243	1.02537	1.20687	0.010385	Monocytes
SIRPB1	81	Inverse variance weighted	-0.0345041	0.0136437	0.966084	0.940592	0.992268	0.0114407	Monocytes
SLC2A5	17	Inverse variance weighted	-0.124538	0.0496489	0.882905	0.801036	0.973141	0.0121289	Monocytes
VMO1	18	Inverse variance weighted	0.0902442	0.0363317	1.09444	1.01922	1.17522	0.0129954	Monocytes
MAPK11	1	Wald ratio	0.586693	0.238718	1.79803	1.12615	2.87077	0.0139838	Monocytes
PDE6G	4	Inverse variance weighted	-0.377313	0.153586	0.685702	0.507458	0.926553	0.0140224	Monocytes
ENTPD1	43	Inverse variance weighted	-0.0557932	0.0229138	0.945735	0.9042	0.989177	0.0148953	Monocytes
AKR1C2	47	Inverse variance weighted	-0.0675212	0.0281019	0.934708	0.884617	0.987636	0.0162734	Monocytes
FCRL6	16	Inverse variance weighted	0.0782924	0.0327331	1.08144	1.01424	1.15309	0.0167641	Monocytes
CXCL10	12	Inverse variance weighted	0.155832	0.0655564	1.16863	1.02772	1.32886	0.017451	Monocytes
KCNN4	59	Inverse variance weighted	-0.049476	0.0208416	0.951728	0.913634	0.991411	0.017601	Monocytes
H1F0	68	Inverse variance weighted	-0.0345513	0.014708	0.966039	0.938588	0.994293	0.0188164	Monocytes
CD2	1	Wald ratio	-0.446771	0.192248	0.63969	0.438859	0.932426	0.0201292	Monocytes
SERPING1	26	Inverse variance weighted	0.0959433	0.0414109	1.1007	1.01489	1.19376	0.0205113	Monocytes
GPA33	9	Inverse variance weighted	-0.213756	0.0922902	0.807545	0.673919	0.967667	0.0205511	Monocytes
PIK3IP1	57	Inverse variance weighted	-0.0581974	0.0252791	0.943464	0.897857	0.991387	0.0213242	Monocytes
TNFRSF11A	3	Inverse variance weighted	-0.366063	0.15962	0.693459	0.507165	0.948183	0.0218285	Monocytes
DDO	31	Inverse variance weighted	0.0774878	0.0340267	1.08057	1.01085	1.15509	0.0227702	Monocytes
KIR2DL3	3	Inverse variance weighted	0.216959	0.0954521	1.24229	1.03032	1.49787	0.0230283	Monocytes
PARM1	5	Inverse variance weighted	-0.152238	0.0670283	0.858783	0.753057	0.979353	0.0231315	Monocytes
CD1E	24	Inverse variance weighted	-0.0975039	0.0429922	0.907099	0.833794	0.986848	0.0233327	Monocytes
CD55	76	Inverse variance weighted	0.0396824	0.0175221	1.04048	1.00535	1.07683	0.0235307	Monocytes
AURKB	6	Inverse variance weighted	0.130941	0.0583545	1.1399	1.0167	1.27803	0.0248392	Monocytes
KIF11	2	Inverse variance weighted	0.355565	0.159281	1.42699	1.04433	1.94986	0.0255945	Monocytes
UTS2	24	Inverse variance weighted	0.0840882	0.0378025	1.08772	1.01005	1.17138	0.0261209	Monocytes
FPR2	60	Inverse variance weighted	0.0375917	0.0171137	1.03831	1.00406	1.07373	0.0280498	Monocytes
CACNA2D3	16	Inverse variance weighted	-0.126618	0.0579658	0.88107	0.786446	0.987079	0.0289364	Monocytes
MS4A1	1	Wald ratio	0.857817	0.392822	2.35801	1.09186	5.0924	0.0289822	Monocytes
C3	3	Inverse variance weighted	0.304288	0.139464	1.35566	1.03142	1.78182	0.0291213	Monocytes
SLAMF7	6	Inverse variance weighted	0.17619	0.0810884	1.19266	1.01741	1.39811	0.0297948	Monocytes
CHI3L2	54	Inverse variance weighted	0.0416171	0.0193197	1.0425	1.00376	1.08273	0.0312299	Monocytes
SLCO5A1	1	Wald ratio	0.758232	0.353548	2.1345	1.06745	4.26818	0.0319821	Monocytes
IGLC3	6	Inverse variance weighted	0.0758811	0.0355173	1.07883	1.00629	1.15661	0.0326425	Monocytes
LTBP2	7	Inverse variance weighted	0.182341	0.0858	1.20002	1.01427	1.41979	0.0335707	Monocytes
ATP1A4	24	Inverse variance weighted	0.0751168	0.0358549	1.07801	1.00485	1.15649	0.0361688	Monocytes
EDN1	9	Inverse variance weighted	0.157954	0.0758242	1.17111	1.00938	1.35876	0.0372364	Monocytes
LTB	2	Inverse variance weighted	-0.340174	0.163341	0.711646	0.516684	0.980174	0.0372881	Monocytes
SLC40A1	40	Inverse variance weighted	-0.0579753	0.027931	0.943673	0.893401	0.996775	0.0379251	Monocytes
FCGR2B	63	Inverse variance weighted	-0.0298293	0.0144088	0.970611	0.943583	0.998413	0.038432	Monocytes
CD244	22	Inverse variance weighted	0.0880224	0.0426815	1.09201	1.00438	1.1873	0.0391786	Monocytes
FBP1	19	Inverse variance weighted	0.10319	0.0504142	1.1087	1.00439	1.22385	0.040674	Monocytes
TK1	1	Wald ratio	-0.647879	0.318397	0.523154	0.280288	0.976462	0.0418699	Monocytes
HLA-DRB5	54	Inverse variance weighted	-0.0297668	0.0149086	0.970672	0.942718	0.999454	0.0458663	Monocytes
ELANE	5	Inverse variance weighted	0.180938	0.0909258	1.19834	1.00273	1.43212	0.0465962	Monocytes
CD70	4	Inverse variance weighted	-0.223951	0.112667	0.799354	0.640966	0.996882	0.0468427	Monocytes
CHIT1	7	Inverse variance weighted	0.171228	0.0864743	1.18676	1.00174	1.40596	0.0476926	Monocytes
MMRN1	11	Inverse variance weighted	-0.154599	0.078586	0.856759	0.734454	0.99943	0.0491531	Monocytes
TYMS	6	Inverse variance weighted	-0.233587	0.118993	0.791688	0.626996	0.99964	0.0496432	Monocytes
CCR1	50	Inverse variance weighted	0.116558	0.023807	1.12362	1.0724	1.1773	9.78e-07	Stromal cells
CTSK	62	Inverse variance weighted	-0.0611565	0.0162452	0.940676	0.911196	0.97111	0.000166825	Stromal cells
CPA3	9	Inverse variance weighted	-0.313675	0.0841714	0.730756	0.619618	0.861828	0.000194058	Stromal cells
TPSAB1	32	Inverse variance weighted	-0.0910238	0.024941	0.912996	0.869438	0.958736	0.000262688	Stromal cells
CTSW	55	Inverse variance weighted	-0.0690802	0.019044	0.933252	0.899059	0.968745	0.000286292	Stromal cells
ADAMTS10	8	Inverse variance weighted	-0.233056	0.0643775	0.79211	0.69821	0.898637	0.000294441	Stromal cells
CXCL5	37	Inverse variance weighted	0.0913336	0.0263505	1.09563	1.04048	1.15371	0.000528064	Stromal cells
GPR153	2	Inverse variance weighted	0.521951	0.151433	1.68531	1.2525	2.26768	0.000567367	Stromal cells
CLEC11A	10	Inverse variance weighted	0.124183	0.0367541	1.13222	1.05353	1.2168	0.000728147	Stromal cells
TNFRSF4	9	Inverse variance weighted	0.171355	0.0522062	1.18691	1.07147	1.31479	0.00102972	Stromal cells
ADAM12	9	Inverse variance weighted	0.256762	0.0833124	1.29274	1.09798	1.52204	0.00205672	Stromal cells
CCR6	17	Inverse variance weighted	-0.162956	0.0530248	0.849629	0.765761	0.942681	0.00211774	Stromal cells
CCR4	13	Inverse variance weighted	0.181598	0.0614101	1.19913	1.06315	1.35251	0.00310507	Stromal cells
CDA	52	Inverse variance weighted	-0.0532044	0.0185238	0.948186	0.914378	0.983244	0.00407599	Stromal cells
CD36	57	Inverse variance weighted	-0.050244	0.0177446	0.950997	0.918491	0.984654	0.00463294	Stromal cells
COL4A2	1	Wald ratio	-0.708844	0.252805	0.492213	0.299889	0.807877	0.00504865	Stromal cells
CX3CR1	25	Inverse variance weighted	0.127245	0.0465975	1.1357	1.03657	1.2443	0.00631944	Stromal cells
HIST1H4H	51	Inverse variance weighted	0.0763565	0.028596	1.07935	1.02052	1.14157	0.0075811	Stromal cells
LAMA2	3	Inverse variance weighted	-0.305113	0.1178	0.73704	0.585084	0.928462	0.00959477	Stromal cells
PTGIR	22	Inverse variance weighted	0.106543	0.0415737	1.11243	1.02537	1.20687	0.010385	Stromal cells
ANGPT1	48	Inverse variance weighted	-0.05871	0.0229505	0.94298	0.901502	0.986367	0.0105242	Stromal cells
VMO1	18	Inverse variance weighted	0.0902442	0.0363317	1.09444	1.01922	1.17522	0.0129954	Stromal cells
ENTPD1	43	Inverse variance weighted	-0.0557932	0.0229138	0.945735	0.9042	0.989177	0.0148953	Stromal cells
CYP11A1	2	Inverse variance weighted	0.574359	0.238253	1.77599	1.11336	2.833	0.0159214	Stromal cells
FCRL6	16	Inverse variance weighted	0.0782924	0.0327331	1.08144	1.01424	1.15309	0.0167641	Stromal cells
CXCL10	12	Inverse variance weighted	0.155832	0.0655564	1.16863	1.02772	1.32886	0.017451	Stromal cells
ADAM8	9	Inverse variance weighted	-0.17113	0.0725305	0.842712	0.731038	0.971446	0.0183036	Stromal cells
CD2	1	Wald ratio	-0.446771	0.192248	0.63969	0.438859	0.932426	0.0201292	Stromal cells
KIR2DL3	3	Inverse variance weighted	0.216959	0.0954521	1.24229	1.03032	1.49787	0.0230283	Stromal cells
CD1E	24	Inverse variance weighted	-0.0975039	0.0429922	0.907099	0.833794	0.986848	0.0233327	Stromal cells
COL5A3	33	Inverse variance weighted	0.0837747	0.0371699	1.08738	1.01098	1.16956	0.0242067	Stromal cells
AURKB	6	Inverse variance weighted	0.130941	0.0583545	1.1399	1.0167	1.27803	0.0248392	Stromal cells
COL6A1	27	Inverse variance weighted	-0.0921232	0.0413907	0.911993	0.840928	0.989063	0.0260343	Stromal cells
MS4A1	1	Wald ratio	0.857817	0.392822	2.35801	1.09186	5.0924	0.0289822	Stromal cells
FCN1	43	Inverse variance weighted	0.0445752	0.0205418	1.04558	1.00432	1.08854	0.0300083	Stromal cells
CHI3L2	54	Inverse variance weighted	0.0416171	0.0193197	1.0425	1.00376	1.08273	0.0312299	Stromal cells
IGLC3	6	Inverse variance weighted	0.0758811	0.0355173	1.07883	1.00629	1.15661	0.0326425	Stromal cells
LTBP2	7	Inverse variance weighted	0.182341	0.0858	1.20002	1.01427	1.41979	0.0335707	Stromal cells
IGFBP7	27	Inverse variance weighted	0.0799691	0.038022	1.08325	1.00546	1.16707	0.0354453	Stromal cells
LTB	2	Inverse variance weighted	-0.340174	0.163341	0.711646	0.516684	0.980174	0.0372881	Stromal cells
CXCR4	1	Wald ratio	-0.729379	0.358321	0.482208	0.238905	0.973293	0.0417958	Stromal cells
PLOD1	41	Inverse variance weighted	0.0362927	0.0179525	1.03696	1.00111	1.0741	0.0432179	Stromal cells
ITK	19	Inverse variance weighted	0.099141	0.0496506	1.10422	1.00183	1.21708	0.0458497	Stromal cells
ELANE	5	Inverse variance weighted	0.180938	0.0909258	1.19834	1.00273	1.43212	0.0465962	Stromal cells
CD70	4	Inverse variance weighted	-0.223951	0.112667	0.799354	0.640966	0.996882	0.0468427	Stromal cells
SCNN1D	6	Inverse variance weighted	0.265753	0.133921	1.30441	1.00327	1.69594	0.0472112	Stromal cells
CHIT1	7	Inverse variance weighted	0.171228	0.0864743	1.18676	1.00174	1.40596	0.0476926	Stromal cells
ORM1	38	Inverse variance weighted	0.0387196	0.0196269	1.03948	1.00025	1.08025	0.0485196	Stromal cells
TYMS	6	Inverse variance weighted	-0.233587	0.118993	0.791688	0.626996	0.99964	0.0496432	Stromal cells
